# Supplementary material for: Transcript assembly improves expression quantification of transposable elements in single-cell RNA-seq data
Source: HighWire-hosted journal article supplement (doi:10.1101/gr.265173.120), 2020-12-21
Supplement: Supplemental_Table_S1.xlsx [file Supplemental_Table_S1.xlsx]

## Sheet: Sheet1
	Supplemental Table S1 Summary of datasets utilized in this manuscript Descriptions and accession IDs of all the datasets utilized in this manuscript are listed in Supplemental_Table_S1.xlsx.
	Descriptions and accession IDs of all the datasets utilized in this manuscript
	Data used in Figure 1A
	Type	Sequencing method	Condition	Study/Lab	Accession ID	Citation
	scRNA-seq	Drop-seq, SCRB-seq, CEL-seq2, MARS-seq, Smart-seq, Smart-seq2	mESC 2i culture	Wolfgang Enard	GSE75790	Christoph Ziegenhain et al. Comparative Analysis of Single-Cell RNA Sequencing Methods. Mol Cell. 2017 Feb 16;65(4):631-643.e4.
	scRNA-seq	Smart-seq	mESC 2i culture	Oliver Stegle	E-MTAB-2805	Florian Buettner et al. Computational analysis of cell-to-cell heterogeneity in single-cell RNA-sequencing data reveals hidden subpopulations of cells. Nat Biotechnol. 2015 Feb;33(2):155-60. doi: 10.1038/nbt.3102. Epub 2015 Jan 19.
	scRNA-seq	Smart-seq	mESC 2i or serum culture	Sarah A.Teichmann	E-MTAB-2600	Jong Kyoung Kim et al. Characterizing noise structure in single-cell RNA-seq distinguishes genuine from technical stochastic allelic expression. Nat Commun. 2015 Oct 22;6:8687. doi: 10.1038/ncomms9687.
	bulk RNA-seq	TruSeq	mESC 2i or serum culture	Sarah A.Teichmann	E-MTAB-2600
	scRNA-seq	CEL-seq	mESC 2i culture	Alexander van Oudenaarden	GSE54695	Dominic Grün et al. Validation of noise models for single-cell transcriptomics. Nat Methods. 2014 Jun;11(6):637-40. doi: 10.1038/nmeth.2930. Epub 2014 Apr 20.
	scRNA-seq	SCRB-seq, Smart-seq	mESC 2i culture, RA induced differentiation	Alexander van Oudenaarden	GSE79578	Stefan Semrau et al. Dynamics of lineage commitment revealed by single-cell transcriptomics of differentiating embryonic stem cells. Nat Commun. 2017 Oct 23;8(1):1096. doi: 10.1038/s41467-017-01076-4.
	bulk RNA-seq	bulk RNA processed with SCRB-seq protocol	mESC 2i culture, RA induced differentiation	Alexander van Oudenaarden	GSE79578
	scRNA-seq	Smart-seq2, 10X, CEL-seq, Drop-seq	human peripheral blood mononuclear cells	HCA	GSE132044	Jiarui Ding et al. Systematic comparison of single-cell and single-nucleus RNA-sequencing methods. Nat Biotechnol. 2020 Jun;38(6):737-746. doi: 10.1038/s41587-020-0465-8. Epub 2020 Apr 6.
	bulk RNA-seq	TruSeq	human peripheral blood mononuclear cells	HCA	GSE132044
	scRNA-seq	10X	GM12878 and GM18502	James J. Cai	GSE126321	Daniel Osorio et al. Single-cell RNA sequencing of a European and an African lymphoblastoid cell line. Sci Data. 2019 Jul 4;6(1):112. doi: 10.1038/s41597-019-0116-4.
	scRNA-seq	10X	GM12891	Jianbin Wang	GSE111912	Xiannian Zhang et al. Comparative Analysis of Droplet-Based Ultra-High-Throughput Single-Cell RNA-Seq Systems. Mol Cell. 2019 Jan 3;73(1):130-142.e5.
	bulk RNA-seq	bulk RNA-seq	GM12878 and GM12891	ENCODE/Caltech	ENCSR000CWK, ENCSR000EYN	We downloaded the call sets from the ENCODE portal (Sloan et al. 2016) (https://www.encodeproject.org/) with the following identifiers: ENCSR000CWK and ENCSR000EYN
	37 bulk RNA-seq samples used for Transcript assembly
	Type	Condition	Lab	Accession ID	Citation
	bulk RNA-seq	mESC_2i_rep1	Ting Wang	GSM3943127
	bulk RNA-seq	mESC_2i_rep2	Ting Wang	GSM3943128
	bulk RNA-seq	mESC_2i_rep3	Ting Wang	GSM3943129
	bulk RNA-seq	mESC_serum_rep1	Sarah A.Teichmann	ERR523093	Jong Kyoung Kim et al. Characterizing noise structure in single-cell RNA-seq distinguishes genuine from technical stochastic allelic expression. Nat Commun. 2015 Oct 22;6:8687. doi: 10.1038/ncomms9687.
	bulk RNA-seq	mESC_serum_rep2	Sarah A.Teichmann	ERR523027
	bulk RNA-seq	mESC_2i	Sarah A.Teichmann	ERR522956
	bulk RNA-seq	mESC	Kazuhiko Nakabayashi	SRR9951828	Junko Tomikawa et al. Exploring trophoblast-specific Tead4 enhancers through chromatin conformation capture assays followed by functional screening. Nucleic Acids Res . 2020 Jan 10;48(1):278-289. doi: 10.1093/nar/gkz1034.
	bulk RNA-seq	mTSC	Kazuhiko Nakabayashi	SRR9951829
	bulk RNA-seq	E7.5_exVE_cells_rep1	Dana Pe’er	SRR8261864	Sonja Nowotschin et al. The emergent landscape of the mouse gut endoderm at single-cell resolution. Nature. 2019 May;569(7756):361-367. doi: 10.1038/s41586-019-1127-1. Epub 2019 Apr 8.
	bulk RNA-seq	E7.5_exVE_cells_rep2	Dana Pe’er	SRR8261865
	bulk RNA-seq	E7.5_emVE_cells_rep1	Dana Pe’er	SRR8261855
	bulk RNA-seq	E7.5_emVE_cells_rep2	Dana Pe’er	SRR8261853
	bulk RNA-seq	E8.75_Gut_tube_dissociated_cells_rep1	Dana Pe’er	SRR8261850
	bulk RNA-seq	E8.75_Gut_tube_dissociated_cells_rep2	Dana Pe’er	SRR8261851
	bulk RNA-seq	E8.75_Gut_tube_bulk_tissue_rep1	Dana Pe’er	SRR8261852
	bulk RNA-seq	E8.75_Gut_tube_bulk_tissue_rep2	Dana Pe’er	SRR8261854
	bulk RNA-seq	E8.75_Gut_tube_anterior_rep1	Dana Pe’er	SRR8261856
	bulk RNA-seq	E8.75_Gut_tube_anterior_rep2	Dana Pe’er	SRR8261857
	bulk RNA-seq	E8.75_Gut_tube_anterior_mid_gut_rep1	Dana Pe’er	SRR8261858
	bulk RNA-seq	E8.75_Gut_tube_anterior_mid_gut_rep2	Dana Pe’er	SRR8261859
	bulk RNA-seq	E8.75_Gut_tube_mid_gut_posterior_rep1	Dana Pe’er	SRR8261860
	bulk RNA-seq	E8.75_Gut_tube_mid_gut_posterior_rep2	Dana Pe’er	SRR8261861
	bulk RNA-seq	E8.75_Gut_tube_posterior_rep1	Dana Pe’er	SRR8261862
	bulk RNA-seq	E8.75_Gut_tube_posterior_rep2	Dana Pe’er	SRR8261863
	bulk RNA-seq	E8.25_Caudal end mesoderm	Bernhard G. Herrmann	ERR332386	Martin Werber et al. The tissue-specific transcriptomic landscape of the mid-gestational mouse embryo. Development. 2014 Jun;141(11):2325-30. doi: 10.1242/dev.105858. Epub 2014 May 6.
	bulk RNA-seq	E8.25_Head	Bernhard G. Herrmann	ERR332387
	bulk RNA-seq	E8.25_Heart	Bernhard G. Herrmann	ERR332388
	bulk RNA-seq	E8.25_Presumptive_spinal_cord	Bernhard G. Herrmann	ERR332389
	bulk RNA-seq	E8.25_Somites	Bernhard G. Herrmann	ERR332390
	bulk RNA-seq	E8.25_Carcass	Bernhard G. Herrmann	ERR332391
	bulk RNA-seq	E8.5_embryo_rep1	Thomas G. Fazzio	SRR6825342	Diwash Acharya et al. TIP55, a splice isoform of the KAT5 acetyltransferase, is essential for developmental gene regulation and organogenesis. Sci Rep. 2018 Oct 8;8(1):14908. doi: 10.1038/s41598-018-33213-4.
	bulk RNA-seq	E8.5_embryo_rep2	Thomas G. Fazzio	SRR6825343
	bulk RNA-seq	E8.5_embryo_rep3	Thomas G. Fazzio	SRR6825344
	bulk RNA-seq	E8.5_embryo_rep1	Michael Weber	SRR1652561	Ghislain Auclair et al. Ontogeny of CpG island methylation and specificity of DNMT3 methyltransferases during embryonic development in the mouse. Genome Biol. 2014;15(12):545. doi: 10.1186/s13059-014-0545-5.
	bulk RNA-seq	E8.5_embryo_rep2	Michael Weber	SRR1652562
	bulk RNA-seq	E8.5_embryo_rep3	Michael Weber	SRR1652563
	bulk RNA-seq	E9.5_TGC	Terry L. Orr-Weaver	SRR808966	Noa Sher et al. Fundamental differences in endoreplication in mammals and Drosophila revealed by analysis of endocycling and endomitotic cells. Proc Natl Acad Sci U S A. 2013 Jun 4;110(23):9368-73.
	scRNA-seq data from mouse early embryogenesis
	Type	Condition	Lab	Accession ID	Citation
	scRNA-seq	zygote to late blastocyst	Rickard Sandberg	GSE45719	Qiaolin Deng et al. Single-cell RNA-seq reveals dynamic, random monoallelic gene expression in mammalian cells. Science. 2014 Jan 10;343(6167):193-6. doi: 10.1126/science.1245316.
	scRNA-seq	E3.5, E4.5, E5.5 and E6.5	Wolf Reik	GSE100597	Hisham Mohammed et al. Single-Cell Landscape of Transcriptional Heterogeneity and Cell Fate Decisions during Mouse Early Gastrulation. Cell Rep. 2017 Aug 1;20(5):1215-1228. doi: 10.1016/j.celrep.2017.07.009.
	scRNA-seq	E5.25, E5.5, E6.25 and E6.5	Qiaolin Deng	GSE109071	Shangli Cheng et al. Single-Cell RNA-Seq Reveals Cellular Heterogeneity of Pluripotency Transition and X Chromosome Dynamics during Early Mouse Development. Cell Rep. 2019 Mar 5;26(10):2593-2607.e3. doi: 10.1016/j.celrep.2019.02.031.
	scRNA-seq	E6.5 to E8.5	Berthold Göttgens	E-MTAB-6967	Blanca Pijuan-Sala et al. A single-cell molecular map of mouse gastrulation and early organogenesis. Nature. 2019 Feb;566(7745):490-495. doi: 10.1038/s41586-019-0933-9. Epub 2019 Feb 20.
	Other data
	Type	Condition	Lab	Accession ID	Citation
	ATAC-seq	mESC	Ting Wang	GSM3943130
	WGBS	mESC	Ting Wang	GSM3943126
	CAGE peaks	mouse	FANTOM5	https://fantom.gsc.riken.jp/5/datafiles/reprocessed/mm10_latest/extra/CAGE_peaks/	FANTOM Consortium and the RIKEN PMI and CLST (DGT) et al. A promoter-level mammalian expression atlas. Nature. 2014 Mar 27;507(7493):462-70. doi: 10.1038/nature13182.
