# Supplementary material for: Transcript assembly improves expression quantification of transposable elements in single-cell RNA-seq data
Source: HighWire-hosted journal article supplement (doi:10.1101/gr.265173.120), 2020-12-21
Supplement: Supplemental_Table_S2.xlsx [file Supplemental_Table_S2.xlsx]

## Sheet: Supplemental_Table_S2_assembled
Supplemental Table S2 Genomic locations of assembled TE transcripts
Genomic locations of assembled 5299 TE transcripts
Chromosome	Type	Start	End	Strand	info
chr1	transcript	4856939	4857625	-	transcript_id "te_tx_1.1"; gene_id "te_tx_1";
chr1	exon	4856939	4856961	-	transcript_id "te_tx_1.1"; gene_id "te_tx_1";
chr1	exon	4857354	4857625	-	transcript_id "te_tx_1.1"; gene_id "te_tx_1";
chr1	transcript	5082556	5082912	-	transcript_id "te_tx_2.1"; gene_id "te_tx_2";
chr1	exon	5082556	5082733	-	transcript_id "te_tx_2.1"; gene_id "te_tx_2";
chr1	exon	5082815	5082912	-	transcript_id "te_tx_2.1"; gene_id "te_tx_2";
chr1	transcript	5287584	5351347	+	transcript_id "te_tx_3.1"; gene_id "te_tx_3";
chr1	exon	5287584	5287708	+	transcript_id "te_tx_3.1"; gene_id "te_tx_3";
chr1	exon	5318250	5318415	+	transcript_id "te_tx_3.1"; gene_id "te_tx_3";
chr1	exon	5345433	5351347	+	transcript_id "te_tx_3.1"; gene_id "te_tx_3";
chr1	transcript	5296350	5307501	+	transcript_id "te_tx_4.1"; gene_id "te_tx_4";
chr1	exon	5296350	5297066	+	transcript_id "te_tx_4.1"; gene_id "te_tx_4";
chr1	exon	5307490	5307501	+	transcript_id "te_tx_4.1"; gene_id "te_tx_4";
chr1	transcript	6213287	6214478	-	transcript_id "te_tx_5.1"; gene_id "te_tx_5";
chr1	exon	6213287	6213347	-	transcript_id "te_tx_5.1"; gene_id "te_tx_5";
chr1	exon	6214233	6214478	-	transcript_id "te_tx_5.1"; gene_id "te_tx_5";
chr1	transcript	6916527	6923577	+	transcript_id "te_tx_6.1"; gene_id "te_tx_6";
chr1	exon	6916527	6916995	+	transcript_id "te_tx_6.1"; gene_id "te_tx_6";
chr1	exon	6923400	6923577	+	transcript_id "te_tx_6.1"; gene_id "te_tx_6";
chr1	transcript	6916527	6917015	+	transcript_id "te_tx_6.2"; gene_id "te_tx_6";
chr1	exon	6916527	6917015	+	transcript_id "te_tx_6.2"; gene_id "te_tx_6";
chr1	transcript	7375591	7397913	-	transcript_id "te_tx_7.2"; gene_id "te_tx_7";
chr1	exon	7375591	7376007	-	transcript_id "te_tx_7.2"; gene_id "te_tx_7";
chr1	exon	7381974	7382082	-	transcript_id "te_tx_7.2"; gene_id "te_tx_7";
chr1	exon	7397718	7397913	-	transcript_id "te_tx_7.2"; gene_id "te_tx_7";
chr1	transcript	7314701	7397913	-	transcript_id "te_tx_7.1"; gene_id "te_tx_7";
chr1	exon	7314701	7314932	-	transcript_id "te_tx_7.1"; gene_id "te_tx_7";
chr1	exon	7397718	7397913	-	transcript_id "te_tx_7.1"; gene_id "te_tx_7";
chr1	transcript	7375591	7397913	-	transcript_id "te_tx_7.3"; gene_id "te_tx_7";
chr1	exon	7375591	7376007	-	transcript_id "te_tx_7.3"; gene_id "te_tx_7";
chr1	exon	7382027	7382082	-	transcript_id "te_tx_7.3"; gene_id "te_tx_7";
chr1	exon	7397718	7397913	-	transcript_id "te_tx_7.3"; gene_id "te_tx_7";
chr1	transcript	7375591	7376776	-	transcript_id "te_tx_7.4"; gene_id "te_tx_7";
chr1	exon	7375591	7376007	-	transcript_id "te_tx_7.4"; gene_id "te_tx_7";
chr1	exon	7376659	7376776	-	transcript_id "te_tx_7.4"; gene_id "te_tx_7";
chr1	transcript	7349442	7370102	-	transcript_id "te_tx_8.1"; gene_id "te_tx_8";
chr1	exon	7349442	7370102	-	transcript_id "te_tx_8.1"; gene_id "te_tx_8";
chr1	transcript	7349442	7370102	-	transcript_id "te_tx_8.2"; gene_id "te_tx_8";
chr1	exon	7349442	7350390	-	transcript_id "te_tx_8.2"; gene_id "te_tx_8";
chr1	exon	7351771	7370102	-	transcript_id "te_tx_8.2"; gene_id "te_tx_8";
chr1	transcript	7500584	7518262	+	transcript_id "te_tx_9.2"; gene_id "te_tx_9";
chr1	exon	7500584	7500709	+	transcript_id "te_tx_9.2"; gene_id "te_tx_9";
chr1	exon	7516174	7518262	+	transcript_id "te_tx_9.2"; gene_id "te_tx_9";
chr1	transcript	7497954	7505485	+	transcript_id "te_tx_9.1"; gene_id "te_tx_9";
chr1	exon	7497954	7498055	+	transcript_id "te_tx_9.1"; gene_id "te_tx_9";
chr1	exon	7498261	7498462	+	transcript_id "te_tx_9.1"; gene_id "te_tx_9";
chr1	exon	7500585	7500709	+	transcript_id "te_tx_9.1"; gene_id "te_tx_9";
chr1	exon	7504543	7505485	+	transcript_id "te_tx_9.1"; gene_id "te_tx_9";
chr1	transcript	7924737	7943888	+	transcript_id "te_tx_10.1"; gene_id "te_tx_10";
chr1	exon	7924737	7924893	+	transcript_id "te_tx_10.1"; gene_id "te_tx_10";
chr1	exon	7942672	7943888	+	transcript_id "te_tx_10.1"; gene_id "te_tx_10";
chr1	transcript	7942670	7943888	+	transcript_id "te_tx_10.2"; gene_id "te_tx_10";
chr1	exon	7942670	7943888	+	transcript_id "te_tx_10.2"; gene_id "te_tx_10";
chr1	transcript	7995640	8158342	-	transcript_id "te_tx_11.1"; gene_id "te_tx_11";
chr1	exon	7995640	7995865	-	transcript_id "te_tx_11.1"; gene_id "te_tx_11";
chr1	exon	8158307	8158342	-	transcript_id "te_tx_11.1"; gene_id "te_tx_11";
chr1	transcript	8936290	8954243	+	transcript_id "te_tx_12.1"; gene_id "te_tx_12";
chr1	exon	8936290	8936637	+	transcript_id "te_tx_12.1"; gene_id "te_tx_12";
chr1	exon	8941608	8954243	+	transcript_id "te_tx_12.1"; gene_id "te_tx_12";
chr1	transcript	8936290	8954243	+	transcript_id "te_tx_12.2"; gene_id "te_tx_12";
chr1	exon	8936290	8941140	+	transcript_id "te_tx_12.2"; gene_id "te_tx_12";
chr1	exon	8941608	8954243	+	transcript_id "te_tx_12.2"; gene_id "te_tx_12";
chr1	transcript	8936290	8954243	+	transcript_id "te_tx_12.3"; gene_id "te_tx_12";
chr1	exon	8936290	8936637	+	transcript_id "te_tx_12.3"; gene_id "te_tx_12";
chr1	exon	8941044	8954243	+	transcript_id "te_tx_12.3"; gene_id "te_tx_12";
chr1	transcript	8936290	8954243	+	transcript_id "te_tx_12.4"; gene_id "te_tx_12";
chr1	exon	8936290	8936637	+	transcript_id "te_tx_12.4"; gene_id "te_tx_12";
chr1	exon	8941041	8954243	+	transcript_id "te_tx_12.4"; gene_id "te_tx_12";
chr1	transcript	9748519	9770886	+	transcript_id "te_tx_13.1"; gene_id "te_tx_13";
chr1	exon	9748519	9748645	+	transcript_id "te_tx_13.1"; gene_id "te_tx_13";
chr1	exon	9752449	9752564	+	transcript_id "te_tx_13.1"; gene_id "te_tx_13";
chr1	exon	9770672	9770886	+	transcript_id "te_tx_13.1"; gene_id "te_tx_13";
chr1	transcript	9752431	9771154	+	transcript_id "te_tx_13.5"; gene_id "te_tx_13";
chr1	exon	9752431	9752564	+	transcript_id "te_tx_13.5"; gene_id "te_tx_13";
chr1	exon	9770672	9770795	+	transcript_id "te_tx_13.5"; gene_id "te_tx_13";
chr1	exon	9770960	9771154	+	transcript_id "te_tx_13.5"; gene_id "te_tx_13";
chr1	transcript	9748519	9771154	+	transcript_id "te_tx_13.2"; gene_id "te_tx_13";
chr1	exon	9748519	9748604	+	transcript_id "te_tx_13.2"; gene_id "te_tx_13";
chr1	exon	9750358	9750405	+	transcript_id "te_tx_13.2"; gene_id "te_tx_13";
chr1	exon	9752449	9752564	+	transcript_id "te_tx_13.2"; gene_id "te_tx_13";
chr1	exon	9770672	9770795	+	transcript_id "te_tx_13.2"; gene_id "te_tx_13";
chr1	exon	9770960	9771154	+	transcript_id "te_tx_13.2"; gene_id "te_tx_13";
chr1	transcript	9748519	9770886	+	transcript_id "te_tx_13.3"; gene_id "te_tx_13";
chr1	exon	9748519	9748645	+	transcript_id "te_tx_13.3"; gene_id "te_tx_13";
chr1	exon	9750358	9750405	+	transcript_id "te_tx_13.3"; gene_id "te_tx_13";
chr1	exon	9752449	9752564	+	transcript_id "te_tx_13.3"; gene_id "te_tx_13";
chr1	exon	9770672	9770886	+	transcript_id "te_tx_13.3"; gene_id "te_tx_13";
chr1	transcript	9748519	9771154	+	transcript_id "te_tx_13.4"; gene_id "te_tx_13";
chr1	exon	9748519	9748645	+	transcript_id "te_tx_13.4"; gene_id "te_tx_13";
chr1	exon	9750358	9750405	+	transcript_id "te_tx_13.4"; gene_id "te_tx_13";
chr1	exon	9752449	9752564	+	transcript_id "te_tx_13.4"; gene_id "te_tx_13";
chr1	exon	9770672	9770795	+	transcript_id "te_tx_13.4"; gene_id "te_tx_13";
chr1	exon	9770960	9771154	+	transcript_id "te_tx_13.4"; gene_id "te_tx_13";
chr1	transcript	9788407	9791917	+	transcript_id "te_tx_14.1"; gene_id "te_tx_14";
chr1	exon	9788407	9788555	+	transcript_id "te_tx_14.1"; gene_id "te_tx_14";
chr1	exon	9789656	9789780	+	transcript_id "te_tx_14.1"; gene_id "te_tx_14";
chr1	exon	9791125	9791917	+	transcript_id "te_tx_14.1"; gene_id "te_tx_14";
chr1	transcript	9788407	9789781	+	transcript_id "te_tx_14.2"; gene_id "te_tx_14";
chr1	exon	9788407	9788555	+	transcript_id "te_tx_14.2"; gene_id "te_tx_14";
chr1	exon	9789656	9789781	+	transcript_id "te_tx_14.2"; gene_id "te_tx_14";
chr1	transcript	9888003	9888811	-	transcript_id "te_tx_15.1"; gene_id "te_tx_15";
chr1	exon	9888003	9888703	-	transcript_id "te_tx_15.1"; gene_id "te_tx_15";
chr1	exon	9888737	9888811	-	transcript_id "te_tx_15.1"; gene_id "te_tx_15";
chr1	transcript	9942008	9944129	-	transcript_id "te_tx_16.1"; gene_id "te_tx_16";
chr1	exon	9942008	9942155	-	transcript_id "te_tx_16.1"; gene_id "te_tx_16";
chr1	exon	9942323	9942391	-	transcript_id "te_tx_16.1"; gene_id "te_tx_16";
chr1	exon	9942610	9942717	-	transcript_id "te_tx_16.1"; gene_id "te_tx_16";
chr1	exon	9944020	9944129	-	transcript_id "te_tx_16.1"; gene_id "te_tx_16";
chr1	transcript	9942008	9944129	-	transcript_id "te_tx_16.2"; gene_id "te_tx_16";
chr1	exon	9942008	9942155	-	transcript_id "te_tx_16.2"; gene_id "te_tx_16";
chr1	exon	9942323	9942391	-	transcript_id "te_tx_16.2"; gene_id "te_tx_16";
chr1	exon	9942610	9944129	-	transcript_id "te_tx_16.2"; gene_id "te_tx_16";
chr1	transcript	9942008	9944129	-	transcript_id "te_tx_16.3"; gene_id "te_tx_16";
chr1	exon	9942008	9942149	-	transcript_id "te_tx_16.3"; gene_id "te_tx_16";
chr1	exon	9942323	9942391	-	transcript_id "te_tx_16.3"; gene_id "te_tx_16";
chr1	exon	9942610	9944129	-	transcript_id "te_tx_16.3"; gene_id "te_tx_16";
chr1	transcript	10295766	10301425	-	transcript_id "te_tx_17.1"; gene_id "te_tx_17";
chr1	exon	10295766	10296334	-	transcript_id "te_tx_17.1"; gene_id "te_tx_17";
chr1	exon	10301253	10301425	-	transcript_id "te_tx_17.1"; gene_id "te_tx_17";
chr1	transcript	10878630	10888771	+	transcript_id "te_tx_18.1"; gene_id "te_tx_18";
chr1	exon	10878630	10878668	+	transcript_id "te_tx_18.1"; gene_id "te_tx_18";
chr1	exon	10880887	10880973	+	transcript_id "te_tx_18.1"; gene_id "te_tx_18";
chr1	exon	10888348	10888771	+	transcript_id "te_tx_18.1"; gene_id "te_tx_18";
chr1	transcript	10878630	10882668	+	transcript_id "te_tx_18.2"; gene_id "te_tx_18";
chr1	exon	10878630	10878668	+	transcript_id "te_tx_18.2"; gene_id "te_tx_18";
chr1	exon	10880887	10880973	+	transcript_id "te_tx_18.2"; gene_id "te_tx_18";
chr1	exon	10882103	10882668	+	transcript_id "te_tx_18.2"; gene_id "te_tx_18";
chr1	transcript	11383984	11395533	-	transcript_id "te_tx_19.1"; gene_id "te_tx_19";
chr1	exon	11383984	11386243	-	transcript_id "te_tx_19.1"; gene_id "te_tx_19";
chr1	exon	11386789	11386885	-	transcript_id "te_tx_19.1"; gene_id "te_tx_19";
chr1	exon	11395383	11395533	-	transcript_id "te_tx_19.1"; gene_id "te_tx_19";
chr1	transcript	11386626	11401444	-	transcript_id "te_tx_19.3"; gene_id "te_tx_19";
chr1	exon	11386626	11386885	-	transcript_id "te_tx_19.3"; gene_id "te_tx_19";
chr1	exon	11400895	11401444	-	transcript_id "te_tx_19.3"; gene_id "te_tx_19";
chr1	transcript	11383984	11387026	-	transcript_id "te_tx_19.2"; gene_id "te_tx_19";
chr1	exon	11383984	11386243	-	transcript_id "te_tx_19.2"; gene_id "te_tx_19";
chr1	exon	11386789	11387026	-	transcript_id "te_tx_19.2"; gene_id "te_tx_19";
chr1	transcript	11618924	11625728	-	transcript_id "te_tx_20.1"; gene_id "te_tx_20";
chr1	exon	11618924	11619680	-	transcript_id "te_tx_20.1"; gene_id "te_tx_20";
chr1	exon	11624466	11625728	-	transcript_id "te_tx_20.1"; gene_id "te_tx_20";
chr1	transcript	11776189	11776742	-	transcript_id "te_tx_21.1"; gene_id "te_tx_21";
chr1	exon	11776189	11776349	-	transcript_id "te_tx_21.1"; gene_id "te_tx_21";
chr1	exon	11776632	11776742	-	transcript_id "te_tx_21.1"; gene_id "te_tx_21";
chr1	transcript	11887141	11948679	+	transcript_id "te_tx_22.1"; gene_id "te_tx_22";
chr1	exon	11887141	11888915	+	transcript_id "te_tx_22.1"; gene_id "te_tx_22";
chr1	exon	11948410	11948679	+	transcript_id "te_tx_22.1"; gene_id "te_tx_22";
chr1	transcript	11887141	11891668	+	transcript_id "te_tx_22.2"; gene_id "te_tx_22";
chr1	exon	11887141	11891668	+	transcript_id "te_tx_22.2"; gene_id "te_tx_22";
chr1	transcript	12657085	12658107	-	transcript_id "te_tx_23.1"; gene_id "te_tx_23";
chr1	exon	12657085	12657533	-	transcript_id "te_tx_23.1"; gene_id "te_tx_23";
chr1	exon	12657588	12658107	-	transcript_id "te_tx_23.1"; gene_id "te_tx_23";
chr1	transcript	12736204	12741352	-	transcript_id "te_tx_24.1"; gene_id "te_tx_24";
chr1	exon	12736204	12740297	-	transcript_id "te_tx_24.1"; gene_id "te_tx_24";
chr1	exon	12741238	12741352	-	transcript_id "te_tx_24.1"; gene_id "te_tx_24";
chr1	transcript	12797363	12814240	-	transcript_id "te_tx_25.1"; gene_id "te_tx_25";
chr1	exon	12797363	12798115	-	transcript_id "te_tx_25.1"; gene_id "te_tx_25";
chr1	exon	12805911	12806041	-	transcript_id "te_tx_25.1"; gene_id "te_tx_25";
chr1	exon	12814211	12814240	-	transcript_id "te_tx_25.1"; gene_id "te_tx_25";
chr1	transcript	14237721	14245732	+	transcript_id "te_tx_26.1"; gene_id "te_tx_26";
chr1	exon	14237721	14239173	+	transcript_id "te_tx_26.1"; gene_id "te_tx_26";
chr1	exon	14239350	14245732	+	transcript_id "te_tx_26.1"; gene_id "te_tx_26";
chr1	transcript	14775482	14776598	+	transcript_id "te_tx_27.1"; gene_id "te_tx_27";
chr1	exon	14775482	14775608	+	transcript_id "te_tx_27.1"; gene_id "te_tx_27";
chr1	exon	14776523	14776598	+	transcript_id "te_tx_27.1"; gene_id "te_tx_27";
chr1	transcript	15919248	16010271	+	transcript_id "te_tx_28.1"; gene_id "te_tx_28";
chr1	exon	15919248	15919549	+	transcript_id "te_tx_28.1"; gene_id "te_tx_28";
chr1	exon	15986857	15986963	+	transcript_id "te_tx_28.1"; gene_id "te_tx_28";
chr1	exon	16004379	16004487	+	transcript_id "te_tx_28.1"; gene_id "te_tx_28";
chr1	exon	16007425	16007497	+	transcript_id "te_tx_28.1"; gene_id "te_tx_28";
chr1	exon	16010251	16010271	+	transcript_id "te_tx_28.1"; gene_id "te_tx_28";
chr1	transcript	15919248	15989739	+	transcript_id "te_tx_28.2"; gene_id "te_tx_28";
chr1	exon	15919248	15919549	+	transcript_id "te_tx_28.2"; gene_id "te_tx_28";
chr1	exon	15986857	15986963	+	transcript_id "te_tx_28.2"; gene_id "te_tx_28";
chr1	exon	15987958	15989739	+	transcript_id "te_tx_28.2"; gene_id "te_tx_28";
chr1	transcript	16118106	16118884	-	transcript_id "te_tx_29.1"; gene_id "te_tx_29";
chr1	exon	16118106	16118281	-	transcript_id "te_tx_29.1"; gene_id "te_tx_29";
chr1	exon	16118824	16118884	-	transcript_id "te_tx_29.1"; gene_id "te_tx_29";
chr1	transcript	17250919	17395669	+	transcript_id "te_tx_30.1"; gene_id "te_tx_30";
chr1	exon	17250919	17251050	+	transcript_id "te_tx_30.1"; gene_id "te_tx_30";
chr1	exon	17251164	17251221	+	transcript_id "te_tx_30.1"; gene_id "te_tx_30";
chr1	exon	17394652	17395669	+	transcript_id "te_tx_30.1"; gene_id "te_tx_30";
chr1	transcript	17429802	17434132	-	transcript_id "te_tx_31.1"; gene_id "te_tx_31";
chr1	exon	17429802	17429824	-	transcript_id "te_tx_31.1"; gene_id "te_tx_31";
chr1	exon	17433441	17433537	-	transcript_id "te_tx_31.1"; gene_id "te_tx_31";
chr1	exon	17434028	17434132	-	transcript_id "te_tx_31.1"; gene_id "te_tx_31";
chr1	transcript	17634260	17641573	-	transcript_id "te_tx_32.1"; gene_id "te_tx_32";
chr1	exon	17634260	17636570	-	transcript_id "te_tx_32.1"; gene_id "te_tx_32";
chr1	exon	17637059	17637145	-	transcript_id "te_tx_32.1"; gene_id "te_tx_32";
chr1	exon	17641343	17641573	-	transcript_id "te_tx_32.1"; gene_id "te_tx_32";
chr1	transcript	17634260	17640045	-	transcript_id "te_tx_32.2"; gene_id "te_tx_32";
chr1	exon	17634260	17636570	-	transcript_id "te_tx_32.2"; gene_id "te_tx_32";
chr1	exon	17637059	17637145	-	transcript_id "te_tx_32.2"; gene_id "te_tx_32";
chr1	exon	17639283	17640045	-	transcript_id "te_tx_32.2"; gene_id "te_tx_32";
chr1	transcript	21011099	21012037	+	transcript_id "te_tx_33.1"; gene_id "te_tx_33";
chr1	exon	21011099	21011176	+	transcript_id "te_tx_33.1"; gene_id "te_tx_33";
chr1	exon	21011721	21012037	+	transcript_id "te_tx_33.1"; gene_id "te_tx_33";
chr1	transcript	21055024	21062968	+	transcript_id "te_tx_34.1"; gene_id "te_tx_34";
chr1	exon	21055024	21055140	+	transcript_id "te_tx_34.1"; gene_id "te_tx_34";
chr1	exon	21062869	21062968	+	transcript_id "te_tx_34.1"; gene_id "te_tx_34";
chr1	transcript	21189108	21202208	-	transcript_id "te_tx_35.1"; gene_id "te_tx_35";
chr1	exon	21189108	21189883	-	transcript_id "te_tx_35.1"; gene_id "te_tx_35";
chr1	exon	21193184	21193299	-	transcript_id "te_tx_35.1"; gene_id "te_tx_35";
chr1	exon	21201552	21202208	-	transcript_id "te_tx_35.1"; gene_id "te_tx_35";
chr1	transcript	21189108	21202208	-	transcript_id "te_tx_35.2"; gene_id "te_tx_35";
chr1	exon	21189108	21189883	-	transcript_id "te_tx_35.2"; gene_id "te_tx_35";
chr1	exon	21193184	21193299	-	transcript_id "te_tx_35.2"; gene_id "te_tx_35";
chr1	exon	21201764	21202208	-	transcript_id "te_tx_35.2"; gene_id "te_tx_35";
chr1	transcript	21189108	21202208	-	transcript_id "te_tx_35.3"; gene_id "te_tx_35";
chr1	exon	21189108	21189883	-	transcript_id "te_tx_35.3"; gene_id "te_tx_35";
chr1	exon	21193184	21193299	-	transcript_id "te_tx_35.3"; gene_id "te_tx_35";
chr1	exon	21201976	21202208	-	transcript_id "te_tx_35.3"; gene_id "te_tx_35";
chr1	transcript	21250444	21256014	-	transcript_id "te_tx_36.1"; gene_id "te_tx_36";
chr1	exon	21250444	21250812	-	transcript_id "te_tx_36.1"; gene_id "te_tx_36";
chr1	exon	21253399	21253444	-	transcript_id "te_tx_36.1"; gene_id "te_tx_36";
chr1	exon	21254169	21254338	-	transcript_id "te_tx_36.1"; gene_id "te_tx_36";
chr1	exon	21255887	21256014	-	transcript_id "te_tx_36.1"; gene_id "te_tx_36";
chr1	transcript	21250444	21254376	-	transcript_id "te_tx_36.2"; gene_id "te_tx_36";
chr1	exon	21250444	21250812	-	transcript_id "te_tx_36.2"; gene_id "te_tx_36";
chr1	exon	21253399	21253444	-	transcript_id "te_tx_36.2"; gene_id "te_tx_36";
chr1	exon	21254169	21254376	-	transcript_id "te_tx_36.2"; gene_id "te_tx_36";
chr1	transcript	23300742	23306356	+	transcript_id "te_tx_37.1"; gene_id "te_tx_37";
chr1	exon	23300742	23302286	+	transcript_id "te_tx_37.1"; gene_id "te_tx_37";
chr1	exon	23302314	23306356	+	transcript_id "te_tx_37.1"; gene_id "te_tx_37";
chr1	transcript	30120305	30147745	-	transcript_id "te_tx_38.1"; gene_id "te_tx_38";
chr1	exon	30120305	30121953	-	transcript_id "te_tx_38.1"; gene_id "te_tx_38";
chr1	exon	30122694	30122896	-	transcript_id "te_tx_38.1"; gene_id "te_tx_38";
chr1	exon	30130043	30130111	-	transcript_id "te_tx_38.1"; gene_id "te_tx_38";
chr1	exon	30137845	30138279	-	transcript_id "te_tx_38.1"; gene_id "te_tx_38";
chr1	exon	30147596	30147745	-	transcript_id "te_tx_38.1"; gene_id "te_tx_38";
chr1	transcript	32058245	32074557	-	transcript_id "te_tx_39.1"; gene_id "te_tx_39";
chr1	exon	32058245	32058541	-	transcript_id "te_tx_39.1"; gene_id "te_tx_39";
chr1	exon	32059313	32059421	-	transcript_id "te_tx_39.1"; gene_id "te_tx_39";
chr1	exon	32074508	32074557	-	transcript_id "te_tx_39.1"; gene_id "te_tx_39";
chr1	transcript	33669873	33671020	+	transcript_id "te_tx_40.1"; gene_id "te_tx_40";
chr1	exon	33669873	33670076	+	transcript_id "te_tx_40.1"; gene_id "te_tx_40";
chr1	exon	33670277	33671020	+	transcript_id "te_tx_40.1"; gene_id "te_tx_40";
chr1	transcript	33765196	33765539	+	transcript_id "te_tx_41.1"; gene_id "te_tx_41";
chr1	exon	33765196	33765299	+	transcript_id "te_tx_41.1"; gene_id "te_tx_41";
chr1	exon	33765325	33765539	+	transcript_id "te_tx_41.1"; gene_id "te_tx_41";
chr1	transcript	34516998	34523042	+	transcript_id "te_tx_42.1"; gene_id "te_tx_42";
chr1	exon	34516998	34517065	+	transcript_id "te_tx_42.1"; gene_id "te_tx_42";
chr1	exon	34522784	34523042	+	transcript_id "te_tx_42.1"; gene_id "te_tx_42";
chr1	transcript	34779742	34790972	-	transcript_id "te_tx_43.1"; gene_id "te_tx_43";
chr1	exon	34779742	34784970	-	transcript_id "te_tx_43.1"; gene_id "te_tx_43";
chr1	exon	34786606	34786936	-	transcript_id "te_tx_43.1"; gene_id "te_tx_43";
chr1	exon	34790790	34790972	-	transcript_id "te_tx_43.1"; gene_id "te_tx_43";
chr1	transcript	34779742	34787214	-	transcript_id "te_tx_43.2"; gene_id "te_tx_43";
chr1	exon	34779742	34784970	-	transcript_id "te_tx_43.2"; gene_id "te_tx_43";
chr1	exon	34786606	34787214	-	transcript_id "te_tx_43.2"; gene_id "te_tx_43";
chr1	transcript	35941856	35955136	+	transcript_id "te_tx_44.1"; gene_id "te_tx_44";
chr1	exon	35941856	35942232	+	transcript_id "te_tx_44.1"; gene_id "te_tx_44";
chr1	exon	35952680	35952788	+	transcript_id "te_tx_44.1"; gene_id "te_tx_44";
chr1	exon	35954747	35955136	+	transcript_id "te_tx_44.1"; gene_id "te_tx_44";
chr1	transcript	35962074	35964981	+	transcript_id "te_tx_45.1"; gene_id "te_tx_45";
chr1	exon	35962074	35962399	+	transcript_id "te_tx_45.1"; gene_id "te_tx_45";
chr1	exon	35964922	35964981	+	transcript_id "te_tx_45.1"; gene_id "te_tx_45";
chr1	transcript	35965371	35966144	-	transcript_id "te_tx_46.1"; gene_id "te_tx_46";
chr1	exon	35965371	35965430	-	transcript_id "te_tx_46.1"; gene_id "te_tx_46";
chr1	exon	35965903	35966144	-	transcript_id "te_tx_46.1"; gene_id "te_tx_46";
chr1	transcript	35981781	35984573	-	transcript_id "te_tx_47.1"; gene_id "te_tx_47";
chr1	exon	35981781	35982292	-	transcript_id "te_tx_47.1"; gene_id "te_tx_47";
chr1	exon	35984526	35984573	-	transcript_id "te_tx_47.1"; gene_id "te_tx_47";
chr1	transcript	35987483	35994386	+	transcript_id "te_tx_48.1"; gene_id "te_tx_48";
chr1	exon	35987483	35987686	+	transcript_id "te_tx_48.1"; gene_id "te_tx_48";
chr1	exon	35992101	35994386	+	transcript_id "te_tx_48.1"; gene_id "te_tx_48";
chr1	transcript	36001710	36011195	-	transcript_id "te_tx_49.1"; gene_id "te_tx_49";
chr1	exon	36001710	36003406	-	transcript_id "te_tx_49.1"; gene_id "te_tx_49";
chr1	exon	36003814	36003991	-	transcript_id "te_tx_49.1"; gene_id "te_tx_49";
chr1	exon	36010991	36011195	-	transcript_id "te_tx_49.1"; gene_id "te_tx_49";
chr1	transcript	36001710	36010951	-	transcript_id "te_tx_49.2"; gene_id "te_tx_49";
chr1	exon	36001710	36003406	-	transcript_id "te_tx_49.2"; gene_id "te_tx_49";
chr1	exon	36003814	36003991	-	transcript_id "te_tx_49.2"; gene_id "te_tx_49";
chr1	exon	36010884	36010951	-	transcript_id "te_tx_49.2"; gene_id "te_tx_49";
chr1	transcript	36001710	36005552	-	transcript_id "te_tx_49.3"; gene_id "te_tx_49";
chr1	exon	36001710	36003406	-	transcript_id "te_tx_49.3"; gene_id "te_tx_49";
chr1	exon	36003814	36003991	-	transcript_id "te_tx_49.3"; gene_id "te_tx_49";
chr1	exon	36005458	36005552	-	transcript_id "te_tx_49.3"; gene_id "te_tx_49";
chr1	transcript	36011129	36011824	+	transcript_id "te_tx_50.1"; gene_id "te_tx_50";
chr1	exon	36011129	36011195	+	transcript_id "te_tx_50.1"; gene_id "te_tx_50";
chr1	exon	36011594	36011824	+	transcript_id "te_tx_50.1"; gene_id "te_tx_50";
chr1	transcript	36018249	36021450	+	transcript_id "te_tx_51.1"; gene_id "te_tx_51";
chr1	exon	36018249	36018266	+	transcript_id "te_tx_51.1"; gene_id "te_tx_51";
chr1	exon	36021238	36021450	+	transcript_id "te_tx_51.1"; gene_id "te_tx_51";
chr1	transcript	36059404	36061102	-	transcript_id "te_tx_52.1"; gene_id "te_tx_52";
chr1	exon	36059404	36060259	-	transcript_id "te_tx_52.1"; gene_id "te_tx_52";
chr1	exon	36060860	36061102	-	transcript_id "te_tx_52.1"; gene_id "te_tx_52";
chr1	transcript	36735996	36736257	+	transcript_id "te_tx_53.2"; gene_id "te_tx_53";
chr1	exon	36735996	36736257	+	transcript_id "te_tx_53.2"; gene_id "te_tx_53";
chr1	transcript	36718822	36736257	+	transcript_id "te_tx_53.1"; gene_id "te_tx_53";
chr1	exon	36718822	36718884	+	transcript_id "te_tx_53.1"; gene_id "te_tx_53";
chr1	exon	36723365	36723451	+	transcript_id "te_tx_53.1"; gene_id "te_tx_53";
chr1	exon	36725215	36725298	+	transcript_id "te_tx_53.1"; gene_id "te_tx_53";
chr1	exon	36733848	36733949	+	transcript_id "te_tx_53.1"; gene_id "te_tx_53";
chr1	exon	36736032	36736257	+	transcript_id "te_tx_53.1"; gene_id "te_tx_53";
chr1	transcript	38628912	38635746	+	transcript_id "te_tx_54.1"; gene_id "te_tx_54";
chr1	exon	38628912	38629124	+	transcript_id "te_tx_54.1"; gene_id "te_tx_54";
chr1	exon	38630117	38631106	+	transcript_id "te_tx_54.1"; gene_id "te_tx_54";
chr1	exon	38632525	38632807	+	transcript_id "te_tx_54.1"; gene_id "te_tx_54";
chr1	exon	38635654	38635746	+	transcript_id "te_tx_54.1"; gene_id "te_tx_54";
chr1	transcript	38632522	38635746	+	transcript_id "te_tx_54.2"; gene_id "te_tx_54";
chr1	exon	38632522	38632807	+	transcript_id "te_tx_54.2"; gene_id "te_tx_54";
chr1	exon	38635654	38635746	+	transcript_id "te_tx_54.2"; gene_id "te_tx_54";
chr1	transcript	38652468	38653594	+	transcript_id "te_tx_55.1"; gene_id "te_tx_55";
chr1	exon	38652468	38652692	+	transcript_id "te_tx_55.1"; gene_id "te_tx_55";
chr1	exon	38652787	38653594	+	transcript_id "te_tx_55.1"; gene_id "te_tx_55";
chr1	transcript	39655221	39664780	+	transcript_id "te_tx_56.1"; gene_id "te_tx_56";
chr1	exon	39655221	39655563	+	transcript_id "te_tx_56.1"; gene_id "te_tx_56";
chr1	exon	39663386	39664780	+	transcript_id "te_tx_56.1"; gene_id "te_tx_56";
chr1	transcript	39839548	39840884	-	transcript_id "te_tx_57.1"; gene_id "te_tx_57";
chr1	exon	39839548	39839604	-	transcript_id "te_tx_57.1"; gene_id "te_tx_57";
chr1	exon	39840641	39840884	-	transcript_id "te_tx_57.1"; gene_id "te_tx_57";
chr1	transcript	42648201	42695188	-	transcript_id "te_tx_58.1"; gene_id "te_tx_58";
chr1	exon	42648201	42648456	-	transcript_id "te_tx_58.1"; gene_id "te_tx_58";
chr1	exon	42666841	42667003	-	transcript_id "te_tx_58.1"; gene_id "te_tx_58";
chr1	exon	42694747	42695188	-	transcript_id "te_tx_58.1"; gene_id "te_tx_58";
chr1	transcript	42939992	42952647	-	transcript_id "te_tx_59.1"; gene_id "te_tx_59";
chr1	exon	42939992	42940164	-	transcript_id "te_tx_59.1"; gene_id "te_tx_59";
chr1	exon	42952574	42952647	-	transcript_id "te_tx_59.1"; gene_id "te_tx_59";
chr1	transcript	43215909	43267315	+	transcript_id "te_tx_60.1"; gene_id "te_tx_60";
chr1	exon	43215909	43216432	+	transcript_id "te_tx_60.1"; gene_id "te_tx_60";
chr1	exon	43267203	43267315	+	transcript_id "te_tx_60.1"; gene_id "te_tx_60";
chr1	transcript	43247627	43262334	-	transcript_id "te_tx_61.2"; gene_id "te_tx_61";
chr1	exon	43247627	43247888	-	transcript_id "te_tx_61.2"; gene_id "te_tx_61";
chr1	exon	43258328	43258438	-	transcript_id "te_tx_61.2"; gene_id "te_tx_61";
chr1	exon	43260559	43260687	-	transcript_id "te_tx_61.2"; gene_id "te_tx_61";
chr1	exon	43262234	43262334	-	transcript_id "te_tx_61.2"; gene_id "te_tx_61";
chr1	transcript	43246888	43262334	-	transcript_id "te_tx_61.1"; gene_id "te_tx_61";
chr1	exon	43246888	43247500	-	transcript_id "te_tx_61.1"; gene_id "te_tx_61";
chr1	exon	43247715	43247888	-	transcript_id "te_tx_61.1"; gene_id "te_tx_61";
chr1	exon	43258328	43258438	-	transcript_id "te_tx_61.1"; gene_id "te_tx_61";
chr1	exon	43260559	43260687	-	transcript_id "te_tx_61.1"; gene_id "te_tx_61";
chr1	exon	43262234	43262334	-	transcript_id "te_tx_61.1"; gene_id "te_tx_61";
chr1	transcript	43932297	43933877	-	transcript_id "te_tx_62.1"; gene_id "te_tx_62";
chr1	exon	43932297	43932414	-	transcript_id "te_tx_62.1"; gene_id "te_tx_62";
chr1	exon	43933639	43933877	-	transcript_id "te_tx_62.1"; gene_id "te_tx_62";
chr1	transcript	44549818	44550442	-	transcript_id "te_tx_63.1"; gene_id "te_tx_63";
chr1	exon	44549818	44550080	-	transcript_id "te_tx_63.1"; gene_id "te_tx_63";
chr1	exon	44550309	44550442	-	transcript_id "te_tx_63.1"; gene_id "te_tx_63";
chr1	transcript	45564446	45566153	+	transcript_id "te_tx_64.1"; gene_id "te_tx_64";
chr1	exon	45564446	45564595	+	transcript_id "te_tx_64.1"; gene_id "te_tx_64";
chr1	exon	45565933	45566153	+	transcript_id "te_tx_64.1"; gene_id "te_tx_64";
chr1	transcript	46888023	46897740	+	transcript_id "te_tx_65.1"; gene_id "te_tx_65";
chr1	exon	46888023	46888056	+	transcript_id "te_tx_65.1"; gene_id "te_tx_65";
chr1	exon	46896253	46897740	+	transcript_id "te_tx_65.1"; gene_id "te_tx_65";
chr1	transcript	46888023	46888824	+	transcript_id "te_tx_65.2"; gene_id "te_tx_65";
chr1	exon	46888023	46888056	+	transcript_id "te_tx_65.2"; gene_id "te_tx_65";
chr1	exon	46888194	46888824	+	transcript_id "te_tx_65.2"; gene_id "te_tx_65";
chr1	transcript	46888023	46895307	+	transcript_id "te_tx_65.3"; gene_id "te_tx_65";
chr1	exon	46888023	46888056	+	transcript_id "te_tx_65.3"; gene_id "te_tx_65";
chr1	exon	46888194	46888288	+	transcript_id "te_tx_65.3"; gene_id "te_tx_65";
chr1	exon	46894798	46895307	+	transcript_id "te_tx_65.3"; gene_id "te_tx_65";
chr1	transcript	52108879	52113763	-	transcript_id "te_tx_66.1"; gene_id "te_tx_66";
chr1	exon	52108879	52109259	-	transcript_id "te_tx_66.1"; gene_id "te_tx_66";
chr1	exon	52113721	52113763	-	transcript_id "te_tx_66.1"; gene_id "te_tx_66";
chr1	transcript	52419941	52431907	-	transcript_id "te_tx_67.2"; gene_id "te_tx_67";
chr1	exon	52419941	52420414	-	transcript_id "te_tx_67.2"; gene_id "te_tx_67";
chr1	exon	52431704	52431907	-	transcript_id "te_tx_67.2"; gene_id "te_tx_67";
chr1	transcript	52374515	52431907	-	transcript_id "te_tx_67.1"; gene_id "te_tx_67";
chr1	exon	52374515	52376361	-	transcript_id "te_tx_67.1"; gene_id "te_tx_67";
chr1	exon	52376999	52377090	-	transcript_id "te_tx_67.1"; gene_id "te_tx_67";
chr1	exon	52431704	52431907	-	transcript_id "te_tx_67.1"; gene_id "te_tx_67";
chr1	transcript	52502899	52517639	-	transcript_id "te_tx_68.1"; gene_id "te_tx_68";
chr1	exon	52502899	52504276	-	transcript_id "te_tx_68.1"; gene_id "te_tx_68";
chr1	exon	52515063	52515156	-	transcript_id "te_tx_68.1"; gene_id "te_tx_68";
chr1	exon	52516960	52517041	-	transcript_id "te_tx_68.1"; gene_id "te_tx_68";
chr1	exon	52517511	52517639	-	transcript_id "te_tx_68.1"; gene_id "te_tx_68";
chr1	transcript	52555293	52565900	-	transcript_id "te_tx_69.1"; gene_id "te_tx_69";
chr1	exon	52555293	52556559	-	transcript_id "te_tx_69.1"; gene_id "te_tx_69";
chr1	exon	52565637	52565900	-	transcript_id "te_tx_69.1"; gene_id "te_tx_69";
chr1	transcript	52936266	52940812	-	transcript_id "te_tx_70.1"; gene_id "te_tx_70";
chr1	exon	52936266	52939521	-	transcript_id "te_tx_70.1"; gene_id "te_tx_70";
chr1	exon	52940369	52940812	-	transcript_id "te_tx_70.1"; gene_id "te_tx_70";
chr1	transcript	53293361	53296348	-	transcript_id "te_tx_71.1"; gene_id "te_tx_71";
chr1	exon	53293361	53293412	-	transcript_id "te_tx_71.1"; gene_id "te_tx_71";
chr1	exon	53296159	53296348	-	transcript_id "te_tx_71.1"; gene_id "te_tx_71";
chr1	transcript	54406228	54414329	+	transcript_id "te_tx_72.1"; gene_id "te_tx_72";
chr1	exon	54406228	54407378	+	transcript_id "te_tx_72.1"; gene_id "te_tx_72";
chr1	exon	54411799	54414329	+	transcript_id "te_tx_72.1"; gene_id "te_tx_72";
chr1	transcript	55233268	55234938	-	transcript_id "te_tx_73.1"; gene_id "te_tx_73";
chr1	exon	55233268	55233515	-	transcript_id "te_tx_73.1"; gene_id "te_tx_73";
chr1	exon	55234912	55234938	-	transcript_id "te_tx_73.1"; gene_id "te_tx_73";
chr1	transcript	56503735	56557394	-	transcript_id "te_tx_74.1"; gene_id "te_tx_74";
chr1	exon	56503735	56503799	-	transcript_id "te_tx_74.1"; gene_id "te_tx_74";
chr1	exon	56509604	56509718	-	transcript_id "te_tx_74.1"; gene_id "te_tx_74";
chr1	exon	56556756	56556815	-	transcript_id "te_tx_74.1"; gene_id "te_tx_74";
chr1	exon	56557372	56557394	-	transcript_id "te_tx_74.1"; gene_id "te_tx_74";
chr1	transcript	57359143	57377536	-	transcript_id "te_tx_75.1"; gene_id "te_tx_75";
chr1	exon	57359143	57360663	-	transcript_id "te_tx_75.1"; gene_id "te_tx_75";
chr1	exon	57362566	57362763	-	transcript_id "te_tx_75.1"; gene_id "te_tx_75";
chr1	exon	57375248	57375519	-	transcript_id "te_tx_75.1"; gene_id "te_tx_75";
chr1	exon	57377405	57377536	-	transcript_id "te_tx_75.1"; gene_id "te_tx_75";
chr1	transcript	57362239	57377536	-	transcript_id "te_tx_75.2"; gene_id "te_tx_75";
chr1	exon	57362239	57362763	-	transcript_id "te_tx_75.2"; gene_id "te_tx_75";
chr1	exon	57375248	57375519	-	transcript_id "te_tx_75.2"; gene_id "te_tx_75";
chr1	exon	57377405	57377536	-	transcript_id "te_tx_75.2"; gene_id "te_tx_75";
chr1	transcript	57362239	57375521	-	transcript_id "te_tx_75.3"; gene_id "te_tx_75";
chr1	exon	57362239	57362763	-	transcript_id "te_tx_75.3"; gene_id "te_tx_75";
chr1	exon	57375248	57375521	-	transcript_id "te_tx_75.3"; gene_id "te_tx_75";
chr1	transcript	58384570	58392780	-	transcript_id "te_tx_76.2"; gene_id "te_tx_76";
chr1	exon	58384570	58388967	-	transcript_id "te_tx_76.2"; gene_id "te_tx_76";
chr1	exon	58392456	58392780	-	transcript_id "te_tx_76.2"; gene_id "te_tx_76";
chr1	transcript	58366786	58390699	-	transcript_id "te_tx_76.1"; gene_id "te_tx_76";
chr1	exon	58366786	58366828	-	transcript_id "te_tx_76.1"; gene_id "te_tx_76";
chr1	exon	58388883	58390699	-	transcript_id "te_tx_76.1"; gene_id "te_tx_76";
chr1	transcript	58537732	58538710	+	transcript_id "te_tx_77.1"; gene_id "te_tx_77";
chr1	exon	58537732	58537830	+	transcript_id "te_tx_77.1"; gene_id "te_tx_77";
chr1	exon	58538499	58538710	+	transcript_id "te_tx_77.1"; gene_id "te_tx_77";
chr1	transcript	58643165	58644362	+	transcript_id "te_tx_78.1"; gene_id "te_tx_78";
chr1	exon	58643165	58643299	+	transcript_id "te_tx_78.1"; gene_id "te_tx_78";
chr1	exon	58644168	58644362	+	transcript_id "te_tx_78.1"; gene_id "te_tx_78";
chr1	transcript	58652520	58655715	+	transcript_id "te_tx_79.1"; gene_id "te_tx_79";
chr1	exon	58652520	58652689	+	transcript_id "te_tx_79.1"; gene_id "te_tx_79";
chr1	exon	58654945	58655715	+	transcript_id "te_tx_79.1"; gene_id "te_tx_79";
chr1	transcript	58766204	58769244	-	transcript_id "te_tx_80.2"; gene_id "te_tx_80";
chr1	exon	58766204	58767695	-	transcript_id "te_tx_80.2"; gene_id "te_tx_80";
chr1	exon	58768884	58769244	-	transcript_id "te_tx_80.2"; gene_id "te_tx_80";
chr1	transcript	58762035	58769244	-	transcript_id "te_tx_80.1"; gene_id "te_tx_80";
chr1	exon	58762035	58762704	-	transcript_id "te_tx_80.1"; gene_id "te_tx_80";
chr1	exon	58767240	58767695	-	transcript_id "te_tx_80.1"; gene_id "te_tx_80";
chr1	exon	58768884	58769244	-	transcript_id "te_tx_80.1"; gene_id "te_tx_80";
chr1	transcript	58789426	58801089	+	transcript_id "te_tx_81.1"; gene_id "te_tx_81";
chr1	exon	58789426	58789471	+	transcript_id "te_tx_81.1"; gene_id "te_tx_81";
chr1	exon	58800932	58801089	+	transcript_id "te_tx_81.1"; gene_id "te_tx_81";
chr1	transcript	58800885	58801089	+	transcript_id "te_tx_81.2"; gene_id "te_tx_81";
chr1	exon	58800885	58801089	+	transcript_id "te_tx_81.2"; gene_id "te_tx_81";
chr1	transcript	59586677	59591812	-	transcript_id "te_tx_82.1"; gene_id "te_tx_82";
chr1	exon	59586677	59586694	-	transcript_id "te_tx_82.1"; gene_id "te_tx_82";
chr1	exon	59591368	59591478	-	transcript_id "te_tx_82.1"; gene_id "te_tx_82";
chr1	exon	59591676	59591812	-	transcript_id "te_tx_82.1"; gene_id "te_tx_82";
chr1	transcript	63119710	63131970	+	transcript_id "te_tx_83.2"; gene_id "te_tx_83";
chr1	exon	63119710	63122297	+	transcript_id "te_tx_83.2"; gene_id "te_tx_83";
chr1	exon	63131786	63131970	+	transcript_id "te_tx_83.2"; gene_id "te_tx_83";
chr1	transcript	63117835	63123422	+	transcript_id "te_tx_83.1"; gene_id "te_tx_83";
chr1	exon	63117835	63118669	+	transcript_id "te_tx_83.1"; gene_id "te_tx_83";
chr1	exon	63120947	63123422	+	transcript_id "te_tx_83.1"; gene_id "te_tx_83";
chr1	transcript	63132179	63139517	-	transcript_id "te_tx_84.1"; gene_id "te_tx_84";
chr1	exon	63132179	63132423	-	transcript_id "te_tx_84.1"; gene_id "te_tx_84";
chr1	exon	63133145	63133354	-	transcript_id "te_tx_84.1"; gene_id "te_tx_84";
chr1	exon	63139410	63139517	-	transcript_id "te_tx_84.1"; gene_id "te_tx_84";
chr1	transcript	63132179	63139020	-	transcript_id "te_tx_84.2"; gene_id "te_tx_84";
chr1	exon	63132179	63132423	-	transcript_id "te_tx_84.2"; gene_id "te_tx_84";
chr1	exon	63133145	63133354	-	transcript_id "te_tx_84.2"; gene_id "te_tx_84";
chr1	exon	63138996	63139020	-	transcript_id "te_tx_84.2"; gene_id "te_tx_84";
chr1	transcript	63139247	63139855	+	transcript_id "te_tx_85.1"; gene_id "te_tx_85";
chr1	exon	63139247	63139271	+	transcript_id "te_tx_85.1"; gene_id "te_tx_85";
chr1	exon	63139576	63139855	+	transcript_id "te_tx_85.1"; gene_id "te_tx_85";
chr1	transcript	63439087	63445453	+	transcript_id "te_tx_86.1"; gene_id "te_tx_86";
chr1	exon	63439087	63439266	+	transcript_id "te_tx_86.1"; gene_id "te_tx_86";
chr1	exon	63445212	63445453	+	transcript_id "te_tx_86.1"; gene_id "te_tx_86";
chr1	transcript	65180083	65181909	-	transcript_id "te_tx_87.1"; gene_id "te_tx_87";
chr1	exon	65180083	65180139	-	transcript_id "te_tx_87.1"; gene_id "te_tx_87";
chr1	exon	65181628	65181909	-	transcript_id "te_tx_87.1"; gene_id "te_tx_87";
chr1	transcript	65207980	65209322	+	transcript_id "te_tx_88.1"; gene_id "te_tx_88";
chr1	exon	65207980	65208570	+	transcript_id "te_tx_88.1"; gene_id "te_tx_88";
chr1	exon	65208783	65209322	+	transcript_id "te_tx_88.1"; gene_id "te_tx_88";
chr1	transcript	66700220	66700688	+	transcript_id "te_tx_89.1"; gene_id "te_tx_89";
chr1	exon	66700220	66700421	+	transcript_id "te_tx_89.1"; gene_id "te_tx_89";
chr1	exon	66700649	66700688	+	transcript_id "te_tx_89.1"; gene_id "te_tx_89";
chr1	transcript	72161227	72161801	+	transcript_id "te_tx_90.1"; gene_id "te_tx_90";
chr1	exon	72161227	72161449	+	transcript_id "te_tx_90.1"; gene_id "te_tx_90";
chr1	exon	72161618	72161801	+	transcript_id "te_tx_90.1"; gene_id "te_tx_90";
chr1	transcript	72161227	72161801	+	transcript_id "te_tx_90.2"; gene_id "te_tx_90";
chr1	exon	72161227	72161297	+	transcript_id "te_tx_90.2"; gene_id "te_tx_90";
chr1	exon	72161434	72161801	+	transcript_id "te_tx_90.2"; gene_id "te_tx_90";
chr1	transcript	72161227	72161801	+	transcript_id "te_tx_90.3"; gene_id "te_tx_90";
chr1	exon	72161227	72161403	+	transcript_id "te_tx_90.3"; gene_id "te_tx_90";
chr1	exon	72161568	72161801	+	transcript_id "te_tx_90.3"; gene_id "te_tx_90";
chr1	transcript	72236278	72239242	+	transcript_id "te_tx_91.1"; gene_id "te_tx_91";
chr1	exon	72236278	72236528	+	transcript_id "te_tx_91.1"; gene_id "te_tx_91";
chr1	exon	72237866	72239242	+	transcript_id "te_tx_91.1"; gene_id "te_tx_91";
chr1	transcript	72236278	72245511	+	transcript_id "te_tx_91.2"; gene_id "te_tx_91";
chr1	exon	72236278	72236528	+	transcript_id "te_tx_91.2"; gene_id "te_tx_91";
chr1	exon	72237866	72237923	+	transcript_id "te_tx_91.2"; gene_id "te_tx_91";
chr1	exon	72241371	72241473	+	transcript_id "te_tx_91.2"; gene_id "te_tx_91";
chr1	exon	72243643	72245511	+	transcript_id "te_tx_91.2"; gene_id "te_tx_91";
chr1	transcript	72254832	72257307	+	transcript_id "te_tx_92.1"; gene_id "te_tx_92";
chr1	exon	72254832	72257307	+	transcript_id "te_tx_92.1"; gene_id "te_tx_92";
chr1	transcript	72614789	72623240	-	transcript_id "te_tx_93.1"; gene_id "te_tx_93";
chr1	exon	72614789	72615004	-	transcript_id "te_tx_93.1"; gene_id "te_tx_93";
chr1	exon	72622268	72623240	-	transcript_id "te_tx_93.1"; gene_id "te_tx_93";
chr1	transcript	72718688	72719859	+	transcript_id "te_tx_94.1"; gene_id "te_tx_94";
chr1	exon	72718688	72718839	+	transcript_id "te_tx_94.1"; gene_id "te_tx_94";
chr1	exon	72719120	72719859	+	transcript_id "te_tx_94.1"; gene_id "te_tx_94";
chr1	transcript	72937151	72937593	+	transcript_id "te_tx_95.1"; gene_id "te_tx_95";
chr1	exon	72937151	72937177	+	transcript_id "te_tx_95.1"; gene_id "te_tx_95";
chr1	exon	72937356	72937593	+	transcript_id "te_tx_95.1"; gene_id "te_tx_95";
chr1	transcript	72937151	72938734	+	transcript_id "te_tx_95.2"; gene_id "te_tx_95";
chr1	exon	72937151	72937177	+	transcript_id "te_tx_95.2"; gene_id "te_tx_95";
chr1	exon	72937356	72937493	+	transcript_id "te_tx_95.2"; gene_id "te_tx_95";
chr1	exon	72938558	72938734	+	transcript_id "te_tx_95.2"; gene_id "te_tx_95";
chr1	transcript	73363942	73371418	+	transcript_id "te_tx_96.1"; gene_id "te_tx_96";
chr1	exon	73363942	73364043	+	transcript_id "te_tx_96.1"; gene_id "te_tx_96";
chr1	exon	73365083	73365295	+	transcript_id "te_tx_96.1"; gene_id "te_tx_96";
chr1	exon	73366859	73367115	+	transcript_id "te_tx_96.1"; gene_id "te_tx_96";
chr1	exon	73370436	73371418	+	transcript_id "te_tx_96.1"; gene_id "te_tx_96";
chr1	transcript	73399007	73401518	+	transcript_id "te_tx_97.1"; gene_id "te_tx_97";
chr1	exon	73399007	73399101	+	transcript_id "te_tx_97.1"; gene_id "te_tx_97";
chr1	exon	73400530	73400598	+	transcript_id "te_tx_97.1"; gene_id "te_tx_97";
chr1	exon	73401319	73401518	+	transcript_id "te_tx_97.1"; gene_id "te_tx_97";
chr1	transcript	73399007	73430572	+	transcript_id "te_tx_97.2"; gene_id "te_tx_97";
chr1	exon	73399007	73399101	+	transcript_id "te_tx_97.2"; gene_id "te_tx_97";
chr1	exon	73402587	73402715	+	transcript_id "te_tx_97.2"; gene_id "te_tx_97";
chr1	exon	73430492	73430572	+	transcript_id "te_tx_97.2"; gene_id "te_tx_97";
chr1	transcript	73402522	73430572	+	transcript_id "te_tx_97.3"; gene_id "te_tx_97";
chr1	exon	73402522	73402715	+	transcript_id "te_tx_97.3"; gene_id "te_tx_97";
chr1	exon	73430492	73430572	+	transcript_id "te_tx_97.3"; gene_id "te_tx_97";
chr1	transcript	73618419	73673426	-	transcript_id "te_tx_98.1"; gene_id "te_tx_98";
chr1	exon	73618419	73618666	-	transcript_id "te_tx_98.1"; gene_id "te_tx_98";
chr1	exon	73620196	73620424	-	transcript_id "te_tx_98.1"; gene_id "te_tx_98";
chr1	exon	73672996	73673066	-	transcript_id "te_tx_98.1"; gene_id "te_tx_98";
chr1	exon	73673166	73673426	-	transcript_id "te_tx_98.1"; gene_id "te_tx_98";
chr1	transcript	73664701	73673426	-	transcript_id "te_tx_98.2"; gene_id "te_tx_98";
chr1	exon	73664701	73664817	-	transcript_id "te_tx_98.2"; gene_id "te_tx_98";
chr1	exon	73672996	73673066	-	transcript_id "te_tx_98.2"; gene_id "te_tx_98";
chr1	exon	73673166	73673426	-	transcript_id "te_tx_98.2"; gene_id "te_tx_98";
chr1	transcript	74395047	74398318	-	transcript_id "te_tx_99.1"; gene_id "te_tx_99";
chr1	exon	74395047	74395226	-	transcript_id "te_tx_99.1"; gene_id "te_tx_99";
chr1	exon	74398248	74398318	-	transcript_id "te_tx_99.1"; gene_id "te_tx_99";
chr1	transcript	75455541	75459556	-	transcript_id "te_tx_100.1"; gene_id "te_tx_100";
chr1	exon	75455541	75455859	-	transcript_id "te_tx_100.1"; gene_id "te_tx_100";
chr1	exon	75456515	75456642	-	transcript_id "te_tx_100.1"; gene_id "te_tx_100";
chr1	exon	75456831	75456964	-	transcript_id "te_tx_100.1"; gene_id "te_tx_100";
chr1	exon	75459318	75459556	-	transcript_id "te_tx_100.1"; gene_id "te_tx_100";
chr1	transcript	75455541	75457715	-	transcript_id "te_tx_100.2"; gene_id "te_tx_100";
chr1	exon	75455541	75455859	-	transcript_id "te_tx_100.2"; gene_id "te_tx_100";
chr1	exon	75456515	75456642	-	transcript_id "te_tx_100.2"; gene_id "te_tx_100";
chr1	exon	75456831	75456964	-	transcript_id "te_tx_100.2"; gene_id "te_tx_100";
chr1	exon	75457309	75457715	-	transcript_id "te_tx_100.2"; gene_id "te_tx_100";
chr1	transcript	75508766	75512074	-	transcript_id "te_tx_101.1"; gene_id "te_tx_101";
chr1	exon	75508766	75509088	-	transcript_id "te_tx_101.1"; gene_id "te_tx_101";
chr1	exon	75511673	75512074	-	transcript_id "te_tx_101.1"; gene_id "te_tx_101";
chr1	transcript	76773364	76777744	-	transcript_id "te_tx_102.1"; gene_id "te_tx_102";
chr1	exon	76773364	76777379	-	transcript_id "te_tx_102.1"; gene_id "te_tx_102";
chr1	exon	76777459	76777744	-	transcript_id "te_tx_102.1"; gene_id "te_tx_102";
chr1	transcript	77087564	77093490	-	transcript_id "te_tx_103.1"; gene_id "te_tx_103";
chr1	exon	77087564	77087758	-	transcript_id "te_tx_103.1"; gene_id "te_tx_103";
chr1	exon	77093427	77093490	-	transcript_id "te_tx_103.1"; gene_id "te_tx_103";
chr1	transcript	77140706	77173644	+	transcript_id "te_tx_104.1"; gene_id "te_tx_104";
chr1	exon	77140706	77140757	+	transcript_id "te_tx_104.1"; gene_id "te_tx_104";
chr1	exon	77172998	77173644	+	transcript_id "te_tx_104.1"; gene_id "te_tx_104";
chr1	transcript	77152387	77173644	+	transcript_id "te_tx_104.2"; gene_id "te_tx_104";
chr1	exon	77152387	77152498	+	transcript_id "te_tx_104.2"; gene_id "te_tx_104";
chr1	exon	77172998	77173644	+	transcript_id "te_tx_104.2"; gene_id "te_tx_104";
chr1	transcript	77522265	77556642	+	transcript_id "te_tx_105.1"; gene_id "te_tx_105";
chr1	exon	77522265	77522472	+	transcript_id "te_tx_105.1"; gene_id "te_tx_105";
chr1	exon	77528848	77528913	+	transcript_id "te_tx_105.1"; gene_id "te_tx_105";
chr1	exon	77555185	77555328	+	transcript_id "te_tx_105.1"; gene_id "te_tx_105";
chr1	exon	77555949	77556642	+	transcript_id "te_tx_105.1"; gene_id "te_tx_105";
chr1	transcript	77552592	77584839	+	transcript_id "te_tx_105.3"; gene_id "te_tx_105";
chr1	exon	77552592	77552625	+	transcript_id "te_tx_105.3"; gene_id "te_tx_105";
chr1	exon	77555185	77555328	+	transcript_id "te_tx_105.3"; gene_id "te_tx_105";
chr1	exon	77584807	77584839	+	transcript_id "te_tx_105.3"; gene_id "te_tx_105";
chr1	transcript	77522265	77528949	+	transcript_id "te_tx_105.2"; gene_id "te_tx_105";
chr1	exon	77522265	77522472	+	transcript_id "te_tx_105.2"; gene_id "te_tx_105";
chr1	exon	77528848	77528949	+	transcript_id "te_tx_105.2"; gene_id "te_tx_105";
chr1	transcript	77636568	77640755	+	transcript_id "te_tx_106.1"; gene_id "te_tx_106";
chr1	exon	77636568	77636615	+	transcript_id "te_tx_106.1"; gene_id "te_tx_106";
chr1	exon	77637374	77637558	+	transcript_id "te_tx_106.1"; gene_id "te_tx_106";
chr1	exon	77639882	77639925	+	transcript_id "te_tx_106.1"; gene_id "te_tx_106";
chr1	exon	77640606	77640755	+	transcript_id "te_tx_106.1"; gene_id "te_tx_106";
chr1	transcript	77708483	77712340	+	transcript_id "te_tx_107.1"; gene_id "te_tx_107";
chr1	exon	77708483	77708966	+	transcript_id "te_tx_107.1"; gene_id "te_tx_107";
chr1	exon	77709990	77710079	+	transcript_id "te_tx_107.1"; gene_id "te_tx_107";
chr1	exon	77710318	77710402	+	transcript_id "te_tx_107.1"; gene_id "te_tx_107";
chr1	exon	77711874	77712340	+	transcript_id "te_tx_107.1"; gene_id "te_tx_107";
chr1	transcript	78306947	78310248	-	transcript_id "te_tx_108.1"; gene_id "te_tx_108";
chr1	exon	78306947	78309874	-	transcript_id "te_tx_108.1"; gene_id "te_tx_108";
chr1	exon	78310030	78310248	-	transcript_id "te_tx_108.1"; gene_id "te_tx_108";
chr1	transcript	78594962	78608062	-	transcript_id "te_tx_109.1"; gene_id "te_tx_109";
chr1	exon	78594962	78596859	-	transcript_id "te_tx_109.1"; gene_id "te_tx_109";
chr1	exon	78607923	78608062	-	transcript_id "te_tx_109.1"; gene_id "te_tx_109";
chr1	transcript	78594962	78609275	-	transcript_id "te_tx_109.2"; gene_id "te_tx_109";
chr1	exon	78594962	78596859	-	transcript_id "te_tx_109.2"; gene_id "te_tx_109";
chr1	exon	78609246	78609275	-	transcript_id "te_tx_109.2"; gene_id "te_tx_109";
chr1	transcript	78597705	78599336	-	transcript_id "te_tx_110.1"; gene_id "te_tx_110";
chr1	exon	78597705	78597871	-	transcript_id "te_tx_110.1"; gene_id "te_tx_110";
chr1	exon	78599160	78599336	-	transcript_id "te_tx_110.1"; gene_id "te_tx_110";
chr1	transcript	78668525	78671505	-	transcript_id "te_tx_111.1"; gene_id "te_tx_111";
chr1	exon	78668525	78668664	-	transcript_id "te_tx_111.1"; gene_id "te_tx_111";
chr1	exon	78668836	78671505	-	transcript_id "te_tx_111.1"; gene_id "te_tx_111";
chr1	transcript	79673809	79675054	-	transcript_id "te_tx_112.1"; gene_id "te_tx_112";
chr1	exon	79673809	79673974	-	transcript_id "te_tx_112.1"; gene_id "te_tx_112";
chr1	exon	79674487	79675054	-	transcript_id "te_tx_112.1"; gene_id "te_tx_112";
chr1	transcript	80476511	80479855	+	transcript_id "te_tx_113.1"; gene_id "te_tx_113";
chr1	exon	80476511	80476688	+	transcript_id "te_tx_113.1"; gene_id "te_tx_113";
chr1	exon	80479369	80479855	+	transcript_id "te_tx_113.1"; gene_id "te_tx_113";
chr1	transcript	81610943	81616079	+	transcript_id "te_tx_114.1"; gene_id "te_tx_114";
chr1	exon	81610943	81611015	+	transcript_id "te_tx_114.1"; gene_id "te_tx_114";
chr1	exon	81615950	81616079	+	transcript_id "te_tx_114.1"; gene_id "te_tx_114";
chr1	transcript	81618753	81619124	+	transcript_id "te_tx_115.1"; gene_id "te_tx_115";
chr1	exon	81618753	81618867	+	transcript_id "te_tx_115.1"; gene_id "te_tx_115";
chr1	exon	81619010	81619124	+	transcript_id "te_tx_115.1"; gene_id "te_tx_115";
chr1	transcript	82389987	82392243	-	transcript_id "te_tx_116.1"; gene_id "te_tx_116";
chr1	exon	82389987	82390474	-	transcript_id "te_tx_116.1"; gene_id "te_tx_116";
chr1	exon	82392105	82392243	-	transcript_id "te_tx_116.1"; gene_id "te_tx_116";
chr1	transcript	82393598	82402781	-	transcript_id "te_tx_117.1"; gene_id "te_tx_117";
chr1	exon	82393598	82393854	-	transcript_id "te_tx_117.1"; gene_id "te_tx_117";
chr1	exon	82402632	82402781	-	transcript_id "te_tx_117.1"; gene_id "te_tx_117";
chr1	transcript	83880792	83881520	-	transcript_id "te_tx_118.1"; gene_id "te_tx_118";
chr1	exon	83880792	83880856	-	transcript_id "te_tx_118.1"; gene_id "te_tx_118";
chr1	exon	83881381	83881520	-	transcript_id "te_tx_118.1"; gene_id "te_tx_118";
chr1	transcript	83981187	83989512	-	transcript_id "te_tx_119.1"; gene_id "te_tx_119";
chr1	exon	83981187	83989512	-	transcript_id "te_tx_119.1"; gene_id "te_tx_119";
chr1	transcript	83981187	83989512	-	transcript_id "te_tx_119.2"; gene_id "te_tx_119";
chr1	exon	83981187	83985767	-	transcript_id "te_tx_119.2"; gene_id "te_tx_119";
chr1	exon	83985849	83989512	-	transcript_id "te_tx_119.2"; gene_id "te_tx_119";
chr1	transcript	83981187	83989512	-	transcript_id "te_tx_119.3"; gene_id "te_tx_119";
chr1	exon	83981187	83983716	-	transcript_id "te_tx_119.3"; gene_id "te_tx_119";
chr1	exon	83989035	83989512	-	transcript_id "te_tx_119.3"; gene_id "te_tx_119";
chr1	transcript	84303594	84332841	-	transcript_id "te_tx_120.1"; gene_id "te_tx_120";
chr1	exon	84303594	84306351	-	transcript_id "te_tx_120.1"; gene_id "te_tx_120";
chr1	exon	84309813	84309878	-	transcript_id "te_tx_120.1"; gene_id "te_tx_120";
chr1	exon	84332109	84332841	-	transcript_id "te_tx_120.1"; gene_id "te_tx_120";
chr1	transcript	85169052	85169255	+	transcript_id "te_tx_121.1"; gene_id "te_tx_121";
chr1	exon	85169052	85169255	+	transcript_id "te_tx_121.1"; gene_id "te_tx_121";
chr1	transcript	85496141	85496344	+	transcript_id "te_tx_122.1"; gene_id "te_tx_122";
chr1	exon	85496141	85496344	+	transcript_id "te_tx_122.1"; gene_id "te_tx_122";
chr1	transcript	85890447	85892431	-	transcript_id "te_tx_123.1"; gene_id "te_tx_123";
chr1	exon	85890447	85890609	-	transcript_id "te_tx_123.1"; gene_id "te_tx_123";
chr1	exon	85892320	85892431	-	transcript_id "te_tx_123.1"; gene_id "te_tx_123";
chr1	transcript	86359571	86374390	+	transcript_id "te_tx_124.1"; gene_id "te_tx_124";
chr1	exon	86359571	86360007	+	transcript_id "te_tx_124.1"; gene_id "te_tx_124";
chr1	exon	86367310	86367719	+	transcript_id "te_tx_124.1"; gene_id "te_tx_124";
chr1	exon	86371980	86374390	+	transcript_id "te_tx_124.1"; gene_id "te_tx_124";
chr1	transcript	86366817	86379786	-	transcript_id "te_tx_125.1"; gene_id "te_tx_125";
chr1	exon	86366817	86367590	-	transcript_id "te_tx_125.1"; gene_id "te_tx_125";
chr1	exon	86377164	86377528	-	transcript_id "te_tx_125.1"; gene_id "te_tx_125";
chr1	exon	86379657	86379786	-	transcript_id "te_tx_125.1"; gene_id "te_tx_125";
chr1	transcript	86465607	86472688	-	transcript_id "te_tx_126.1"; gene_id "te_tx_126";
chr1	exon	86465607	86465984	-	transcript_id "te_tx_126.1"; gene_id "te_tx_126";
chr1	exon	86466093	86466236	-	transcript_id "te_tx_126.1"; gene_id "te_tx_126";
chr1	exon	86472584	86472688	-	transcript_id "te_tx_126.1"; gene_id "te_tx_126";
chr1	transcript	86465607	86467184	-	transcript_id "te_tx_126.2"; gene_id "te_tx_126";
chr1	exon	86465607	86465984	-	transcript_id "te_tx_126.2"; gene_id "te_tx_126";
chr1	exon	86466093	86466236	-	transcript_id "te_tx_126.2"; gene_id "te_tx_126";
chr1	exon	86466971	86467184	-	transcript_id "te_tx_126.2"; gene_id "te_tx_126";
chr1	transcript	87075445	87076095	-	transcript_id "te_tx_127.1"; gene_id "te_tx_127";
chr1	exon	87075445	87075835	-	transcript_id "te_tx_127.1"; gene_id "te_tx_127";
chr1	exon	87075920	87076095	-	transcript_id "te_tx_127.1"; gene_id "te_tx_127";
chr1	transcript	87212960	87213676	-	transcript_id "te_tx_128.1"; gene_id "te_tx_128";
chr1	exon	87212960	87213229	-	transcript_id "te_tx_128.1"; gene_id "te_tx_128";
chr1	exon	87213570	87213676	-	transcript_id "te_tx_128.1"; gene_id "te_tx_128";
chr1	transcript	87460131	87464364	+	transcript_id "te_tx_129.1"; gene_id "te_tx_129";
chr1	exon	87460131	87461300	+	transcript_id "te_tx_129.1"; gene_id "te_tx_129";
chr1	exon	87461340	87464364	+	transcript_id "te_tx_129.1"; gene_id "te_tx_129";
chr1	transcript	87671779	87672820	-	transcript_id "te_tx_130.1"; gene_id "te_tx_130";
chr1	exon	87671779	87672036	-	transcript_id "te_tx_130.1"; gene_id "te_tx_130";
chr1	exon	87672751	87672820	-	transcript_id "te_tx_130.1"; gene_id "te_tx_130";
chr1	transcript	88613649	88617369	+	transcript_id "te_tx_131.1"; gene_id "te_tx_131";
chr1	exon	88613649	88617369	+	transcript_id "te_tx_131.1"; gene_id "te_tx_131";
chr1	transcript	88613649	88622046	+	transcript_id "te_tx_131.2"; gene_id "te_tx_131";
chr1	exon	88613649	88615177	+	transcript_id "te_tx_131.2"; gene_id "te_tx_131";
chr1	exon	88618705	88622046	+	transcript_id "te_tx_131.2"; gene_id "te_tx_131";
chr1	transcript	88652894	88657909	+	transcript_id "te_tx_132.1"; gene_id "te_tx_132";
chr1	exon	88652894	88653002	+	transcript_id "te_tx_132.1"; gene_id "te_tx_132";
chr1	exon	88657668	88657909	+	transcript_id "te_tx_132.1"; gene_id "te_tx_132";
chr1	transcript	88754880	88755739	+	transcript_id "te_tx_133.1"; gene_id "te_tx_133";
chr1	exon	88754880	88755290	+	transcript_id "te_tx_133.1"; gene_id "te_tx_133";
chr1	exon	88755534	88755739	+	transcript_id "te_tx_133.1"; gene_id "te_tx_133";
chr1	transcript	88754880	88755739	+	transcript_id "te_tx_133.2"; gene_id "te_tx_133";
chr1	exon	88754880	88755051	+	transcript_id "te_tx_133.2"; gene_id "te_tx_133";
chr1	exon	88755534	88755739	+	transcript_id "te_tx_133.2"; gene_id "te_tx_133";
chr1	transcript	88754880	88755739	+	transcript_id "te_tx_133.3"; gene_id "te_tx_133";
chr1	exon	88754880	88754958	+	transcript_id "te_tx_133.3"; gene_id "te_tx_133";
chr1	exon	88755084	88755271	+	transcript_id "te_tx_133.3"; gene_id "te_tx_133";
chr1	exon	88755534	88755739	+	transcript_id "te_tx_133.3"; gene_id "te_tx_133";
chr1	transcript	88761450	88763153	+	transcript_id "te_tx_134.1"; gene_id "te_tx_134";
chr1	exon	88761450	88761531	+	transcript_id "te_tx_134.1"; gene_id "te_tx_134";
chr1	exon	88762995	88763153	+	transcript_id "te_tx_134.1"; gene_id "te_tx_134";
chr1	transcript	89001183	89016203	-	transcript_id "te_tx_135.1"; gene_id "te_tx_135";
chr1	exon	89001183	89001416	-	transcript_id "te_tx_135.1"; gene_id "te_tx_135";
chr1	exon	89003012	89003143	-	transcript_id "te_tx_135.1"; gene_id "te_tx_135";
chr1	exon	89015973	89016203	-	transcript_id "te_tx_135.1"; gene_id "te_tx_135";
chr1	transcript	89096842	89103735	-	transcript_id "te_tx_136.1"; gene_id "te_tx_136";
chr1	exon	89096842	89102540	-	transcript_id "te_tx_136.1"; gene_id "te_tx_136";
chr1	exon	89102694	89103735	-	transcript_id "te_tx_136.1"; gene_id "te_tx_136";
chr1	transcript	89096842	89103735	-	transcript_id "te_tx_136.2"; gene_id "te_tx_136";
chr1	exon	89096842	89103735	-	transcript_id "te_tx_136.2"; gene_id "te_tx_136";
chr1	transcript	89096842	89103735	-	transcript_id "te_tx_136.3"; gene_id "te_tx_136";
chr1	exon	89096842	89102294	-	transcript_id "te_tx_136.3"; gene_id "te_tx_136";
chr1	exon	89102394	89102540	-	transcript_id "te_tx_136.3"; gene_id "te_tx_136";
chr1	exon	89102694	89103735	-	transcript_id "te_tx_136.3"; gene_id "te_tx_136";
chr1	transcript	89096842	89103735	-	transcript_id "te_tx_136.4"; gene_id "te_tx_136";
chr1	exon	89096842	89102309	-	transcript_id "te_tx_136.4"; gene_id "te_tx_136";
chr1	exon	89102394	89102540	-	transcript_id "te_tx_136.4"; gene_id "te_tx_136";
chr1	exon	89102694	89103735	-	transcript_id "te_tx_136.4"; gene_id "te_tx_136";
chr1	transcript	90518290	90520486	-	transcript_id "te_tx_137.1"; gene_id "te_tx_137";
chr1	exon	90518290	90518412	-	transcript_id "te_tx_137.1"; gene_id "te_tx_137";
chr1	exon	90520172	90520302	-	transcript_id "te_tx_137.1"; gene_id "te_tx_137";
chr1	exon	90520443	90520486	-	transcript_id "te_tx_137.1"; gene_id "te_tx_137";
chr1	transcript	90518290	90522842	-	transcript_id "te_tx_137.2"; gene_id "te_tx_137";
chr1	exon	90518290	90518412	-	transcript_id "te_tx_137.2"; gene_id "te_tx_137";
chr1	exon	90520172	90520302	-	transcript_id "te_tx_137.2"; gene_id "te_tx_137";
chr1	exon	90521141	90522842	-	transcript_id "te_tx_137.2"; gene_id "te_tx_137";
chr1	transcript	90543568	90543973	+	transcript_id "te_tx_138.1"; gene_id "te_tx_138";
chr1	exon	90543568	90543757	+	transcript_id "te_tx_138.1"; gene_id "te_tx_138";
chr1	exon	90543913	90543973	+	transcript_id "te_tx_138.1"; gene_id "te_tx_138";
chr1	transcript	90623180	90628682	-	transcript_id "te_tx_139.1"; gene_id "te_tx_139";
chr1	exon	90623180	90628682	-	transcript_id "te_tx_139.1"; gene_id "te_tx_139";
chr1	transcript	90623180	90628682	-	transcript_id "te_tx_139.2"; gene_id "te_tx_139";
chr1	exon	90623180	90623925	-	transcript_id "te_tx_139.2"; gene_id "te_tx_139";
chr1	exon	90625957	90628682	-	transcript_id "te_tx_139.2"; gene_id "te_tx_139";
chr1	transcript	90887865	90891769	-	transcript_id "te_tx_140.1"; gene_id "te_tx_140";
chr1	exon	90887865	90888114	-	transcript_id "te_tx_140.1"; gene_id "te_tx_140";
chr1	exon	90891598	90891769	-	transcript_id "te_tx_140.1"; gene_id "te_tx_140";
chr1	transcript	91831175	91833903	+	transcript_id "te_tx_141.1"; gene_id "te_tx_141";
chr1	exon	91831175	91831485	+	transcript_id "te_tx_141.1"; gene_id "te_tx_141";
chr1	exon	91832921	91833903	+	transcript_id "te_tx_141.1"; gene_id "te_tx_141";
chr1	transcript	92180631	92189885	+	transcript_id "te_tx_142.1"; gene_id "te_tx_142";
chr1	exon	92180631	92180865	+	transcript_id "te_tx_142.1"; gene_id "te_tx_142";
chr1	exon	92188115	92188387	+	transcript_id "te_tx_142.1"; gene_id "te_tx_142";
chr1	exon	92189770	92189885	+	transcript_id "te_tx_142.1"; gene_id "te_tx_142";
chr1	transcript	92839247	92840158	-	transcript_id "te_tx_143.1"; gene_id "te_tx_143";
chr1	exon	92839247	92839273	-	transcript_id "te_tx_143.1"; gene_id "te_tx_143";
chr1	exon	92839376	92840158	-	transcript_id "te_tx_143.1"; gene_id "te_tx_143";
chr1	transcript	93306083	93307279	+	transcript_id "te_tx_144.1"; gene_id "te_tx_144";
chr1	exon	93306083	93306107	+	transcript_id "te_tx_144.1"; gene_id "te_tx_144";
chr1	exon	93306543	93307279	+	transcript_id "te_tx_144.1"; gene_id "te_tx_144";
chr1	transcript	93468656	93473776	+	transcript_id "te_tx_145.1"; gene_id "te_tx_145";
chr1	exon	93468656	93469246	+	transcript_id "te_tx_145.1"; gene_id "te_tx_145";
chr1	exon	93472836	93473776	+	transcript_id "te_tx_145.1"; gene_id "te_tx_145";
chr1	transcript	93911215	93918036	+	transcript_id "te_tx_146.2"; gene_id "te_tx_146";
chr1	exon	93911215	93911359	+	transcript_id "te_tx_146.2"; gene_id "te_tx_146";
chr1	exon	93914048	93914213	+	transcript_id "te_tx_146.2"; gene_id "te_tx_146";
chr1	exon	93916512	93918036	+	transcript_id "te_tx_146.2"; gene_id "te_tx_146";
chr1	transcript	93910355	93918036	+	transcript_id "te_tx_146.1"; gene_id "te_tx_146";
chr1	exon	93910355	93910735	+	transcript_id "te_tx_146.1"; gene_id "te_tx_146";
chr1	exon	93911217	93911359	+	transcript_id "te_tx_146.1"; gene_id "te_tx_146";
chr1	exon	93914048	93914213	+	transcript_id "te_tx_146.1"; gene_id "te_tx_146";
chr1	exon	93916512	93918036	+	transcript_id "te_tx_146.1"; gene_id "te_tx_146";
chr1	transcript	93914037	93918036	+	transcript_id "te_tx_146.3"; gene_id "te_tx_146";
chr1	exon	93914037	93914213	+	transcript_id "te_tx_146.3"; gene_id "te_tx_146";
chr1	exon	93916512	93918036	+	transcript_id "te_tx_146.3"; gene_id "te_tx_146";
chr1	transcript	93980272	93987237	+	transcript_id "te_tx_147.2"; gene_id "te_tx_147";
chr1	exon	93980272	93980416	+	transcript_id "te_tx_147.2"; gene_id "te_tx_147";
chr1	exon	93983046	93983211	+	transcript_id "te_tx_147.2"; gene_id "te_tx_147";
chr1	exon	93985560	93987237	+	transcript_id "te_tx_147.2"; gene_id "te_tx_147";
chr1	transcript	93979413	93983338	+	transcript_id "te_tx_147.1"; gene_id "te_tx_147";
chr1	exon	93979413	93979793	+	transcript_id "te_tx_147.1"; gene_id "te_tx_147";
chr1	exon	93980274	93980416	+	transcript_id "te_tx_147.1"; gene_id "te_tx_147";
chr1	exon	93983046	93983338	+	transcript_id "te_tx_147.1"; gene_id "te_tx_147";
chr1	transcript	93980272	93983338	+	transcript_id "te_tx_147.3"; gene_id "te_tx_147";
chr1	exon	93980272	93980416	+	transcript_id "te_tx_147.3"; gene_id "te_tx_147";
chr1	exon	93983046	93983338	+	transcript_id "te_tx_147.3"; gene_id "te_tx_147";
chr1	transcript	95160132	95165447	+	transcript_id "te_tx_148.1"; gene_id "te_tx_148";
chr1	exon	95160132	95160226	+	transcript_id "te_tx_148.1"; gene_id "te_tx_148";
chr1	exon	95164630	95164767	+	transcript_id "te_tx_148.1"; gene_id "te_tx_148";
chr1	exon	95165284	95165447	+	transcript_id "te_tx_148.1"; gene_id "te_tx_148";
chr1	transcript	95162448	95165447	+	transcript_id "te_tx_148.2"; gene_id "te_tx_148";
chr1	exon	95162448	95162512	+	transcript_id "te_tx_148.2"; gene_id "te_tx_148";
chr1	exon	95164630	95164767	+	transcript_id "te_tx_148.2"; gene_id "te_tx_148";
chr1	exon	95165284	95165447	+	transcript_id "te_tx_148.2"; gene_id "te_tx_148";
chr1	transcript	95667633	95675468	+	transcript_id "te_tx_149.1"; gene_id "te_tx_149";
chr1	exon	95667633	95668156	+	transcript_id "te_tx_149.1"; gene_id "te_tx_149";
chr1	exon	95671411	95671642	+	transcript_id "te_tx_149.1"; gene_id "te_tx_149";
chr1	exon	95675336	95675468	+	transcript_id "te_tx_149.1"; gene_id "te_tx_149";
chr1	transcript	95671406	95675468	+	transcript_id "te_tx_149.2"; gene_id "te_tx_149";
chr1	exon	95671406	95671642	+	transcript_id "te_tx_149.2"; gene_id "te_tx_149";
chr1	exon	95675336	95675468	+	transcript_id "te_tx_149.2"; gene_id "te_tx_149";
chr1	transcript	95717021	95754107	-	transcript_id "te_tx_150.1"; gene_id "te_tx_150";
chr1	exon	95717021	95717371	-	transcript_id "te_tx_150.1"; gene_id "te_tx_150";
chr1	exon	95745929	95746021	-	transcript_id "te_tx_150.1"; gene_id "te_tx_150";
chr1	exon	95754027	95754107	-	transcript_id "te_tx_150.1"; gene_id "te_tx_150";
chr1	transcript	96871015	96881318	+	transcript_id "te_tx_151.1"; gene_id "te_tx_151";
chr1	exon	96871015	96871256	+	transcript_id "te_tx_151.1"; gene_id "te_tx_151";
chr1	exon	96872190	96872668	+	transcript_id "te_tx_151.1"; gene_id "te_tx_151";
chr1	exon	96877834	96881318	+	transcript_id "te_tx_151.1"; gene_id "te_tx_151";
chr1	transcript	96877538	96881318	+	transcript_id "te_tx_151.3"; gene_id "te_tx_151";
chr1	exon	96877538	96881318	+	transcript_id "te_tx_151.3"; gene_id "te_tx_151";
chr1	transcript	96871015	96881318	+	transcript_id "te_tx_151.2"; gene_id "te_tx_151";
chr1	exon	96871015	96871256	+	transcript_id "te_tx_151.2"; gene_id "te_tx_151";
chr1	exon	96872190	96872390	+	transcript_id "te_tx_151.2"; gene_id "te_tx_151";
chr1	exon	96872485	96872668	+	transcript_id "te_tx_151.2"; gene_id "te_tx_151";
chr1	exon	96877834	96881318	+	transcript_id "te_tx_151.2"; gene_id "te_tx_151";
chr1	transcript	97605018	97615594	+	transcript_id "te_tx_152.1"; gene_id "te_tx_152";
chr1	exon	97605018	97605270	+	transcript_id "te_tx_152.1"; gene_id "te_tx_152";
chr1	exon	97606150	97606210	+	transcript_id "te_tx_152.1"; gene_id "te_tx_152";
chr1	exon	97615330	97615594	+	transcript_id "te_tx_152.1"; gene_id "te_tx_152";
chr1	transcript	97627145	97630140	+	transcript_id "te_tx_153.1"; gene_id "te_tx_153";
chr1	exon	97627145	97627259	+	transcript_id "te_tx_153.1"; gene_id "te_tx_153";
chr1	exon	97629646	97630140	+	transcript_id "te_tx_153.1"; gene_id "te_tx_153";
chr1	transcript	98084591	98085564	+	transcript_id "te_tx_154.1"; gene_id "te_tx_154";
chr1	exon	98084591	98084946	+	transcript_id "te_tx_154.1"; gene_id "te_tx_154";
chr1	exon	98085410	98085564	+	transcript_id "te_tx_154.1"; gene_id "te_tx_154";
chr1	transcript	98542717	98607333	+	transcript_id "te_tx_155.1"; gene_id "te_tx_155";
chr1	exon	98542717	98543045	+	transcript_id "te_tx_155.1"; gene_id "te_tx_155";
chr1	exon	98605131	98605187	+	transcript_id "te_tx_155.1"; gene_id "te_tx_155";
chr1	exon	98606943	98607333	+	transcript_id "te_tx_155.1"; gene_id "te_tx_155";
chr1	transcript	98542717	98587475	+	transcript_id "te_tx_155.2"; gene_id "te_tx_155";
chr1	exon	98542717	98543045	+	transcript_id "te_tx_155.2"; gene_id "te_tx_155";
chr1	exon	98587377	98587475	+	transcript_id "te_tx_155.2"; gene_id "te_tx_155";
chr1	transcript	100223878	100232164	-	transcript_id "te_tx_156.1"; gene_id "te_tx_156";
chr1	exon	100223878	100226385	-	transcript_id "te_tx_156.1"; gene_id "te_tx_156";
chr1	exon	100231690	100232164	-	transcript_id "te_tx_156.1"; gene_id "te_tx_156";
chr1	transcript	105004911	105005362	-	transcript_id "te_tx_157.1"; gene_id "te_tx_157";
chr1	exon	105004911	105005092	-	transcript_id "te_tx_157.1"; gene_id "te_tx_157";
chr1	exon	105005198	105005362	-	transcript_id "te_tx_157.1"; gene_id "te_tx_157";
chr1	transcript	105017240	105046840	+	transcript_id "te_tx_158.1"; gene_id "te_tx_158";
chr1	exon	105017240	105017396	+	transcript_id "te_tx_158.1"; gene_id "te_tx_158";
chr1	exon	105046682	105046840	+	transcript_id "te_tx_158.1"; gene_id "te_tx_158";
chr1	transcript	105574414	105574908	-	transcript_id "te_tx_159.1"; gene_id "te_tx_159";
chr1	exon	105574414	105574908	-	transcript_id "te_tx_159.1"; gene_id "te_tx_159";
chr1	transcript	106793934	106794429	+	transcript_id "te_tx_160.1"; gene_id "te_tx_160";
chr1	exon	106793934	106794060	+	transcript_id "te_tx_160.1"; gene_id "te_tx_160";
chr1	exon	106794083	106794429	+	transcript_id "te_tx_160.1"; gene_id "te_tx_160";
chr1	transcript	108371560	108371915	-	transcript_id "te_tx_161.1"; gene_id "te_tx_161";
chr1	exon	108371560	108371676	-	transcript_id "te_tx_161.1"; gene_id "te_tx_161";
chr1	exon	108371758	108371915	-	transcript_id "te_tx_161.1"; gene_id "te_tx_161";
chr1	transcript	108413542	108415784	-	transcript_id "te_tx_162.1"; gene_id "te_tx_162";
chr1	exon	108413542	108414789	-	transcript_id "te_tx_162.1"; gene_id "te_tx_162";
chr1	exon	108414856	108415784	-	transcript_id "te_tx_162.1"; gene_id "te_tx_162";
chr1	transcript	113891688	113964187	-	transcript_id "te_tx_163.1"; gene_id "te_tx_163";
chr1	exon	113891688	113892048	-	transcript_id "te_tx_163.1"; gene_id "te_tx_163";
chr1	exon	113963819	113964187	-	transcript_id "te_tx_163.1"; gene_id "te_tx_163";
chr1	transcript	113934262	113940967	-	transcript_id "te_tx_164.1"; gene_id "te_tx_164";
chr1	exon	113934262	113935319	-	transcript_id "te_tx_164.1"; gene_id "te_tx_164";
chr1	exon	113938213	113940967	-	transcript_id "te_tx_164.1"; gene_id "te_tx_164";
chr1	transcript	114844402	114856858	+	transcript_id "te_tx_165.1"; gene_id "te_tx_165";
chr1	exon	114844402	114844486	+	transcript_id "te_tx_165.1"; gene_id "te_tx_165";
chr1	exon	114850494	114850529	+	transcript_id "te_tx_165.1"; gene_id "te_tx_165";
chr1	exon	114852286	114852374	+	transcript_id "te_tx_165.1"; gene_id "te_tx_165";
chr1	exon	114856583	114856858	+	transcript_id "te_tx_165.1"; gene_id "te_tx_165";
chr1	transcript	115449824	115801884	-	transcript_id "te_tx_166.1"; gene_id "te_tx_166";
chr1	exon	115449824	115449995	-	transcript_id "te_tx_166.1"; gene_id "te_tx_166";
chr1	exon	115594491	115594608	-	transcript_id "te_tx_166.1"; gene_id "te_tx_166";
chr1	exon	115801807	115801884	-	transcript_id "te_tx_166.1"; gene_id "te_tx_166";
chr1	transcript	117706920	117748863	+	transcript_id "te_tx_167.1"; gene_id "te_tx_167";
chr1	exon	117706920	117708182	+	transcript_id "te_tx_167.1"; gene_id "te_tx_167";
chr1	exon	117748746	117748863	+	transcript_id "te_tx_167.1"; gene_id "te_tx_167";
chr1	transcript	119069892	119078049	-	transcript_id "te_tx_168.1"; gene_id "te_tx_168";
chr1	exon	119069892	119071261	-	transcript_id "te_tx_168.1"; gene_id "te_tx_168";
chr1	exon	119076940	119078049	-	transcript_id "te_tx_168.1"; gene_id "te_tx_168";
chr1	transcript	119074377	119078049	-	transcript_id "te_tx_168.2"; gene_id "te_tx_168";
chr1	exon	119074377	119074434	-	transcript_id "te_tx_168.2"; gene_id "te_tx_168";
chr1	exon	119076940	119078049	-	transcript_id "te_tx_168.2"; gene_id "te_tx_168";
chr1	transcript	119083779	119101496	+	transcript_id "te_tx_169.1"; gene_id "te_tx_169";
chr1	exon	119083779	119083940	+	transcript_id "te_tx_169.1"; gene_id "te_tx_169";
chr1	exon	119084025	119084152	+	transcript_id "te_tx_169.1"; gene_id "te_tx_169";
chr1	exon	119092605	119092684	+	transcript_id "te_tx_169.1"; gene_id "te_tx_169";
chr1	exon	119100176	119101496	+	transcript_id "te_tx_169.1"; gene_id "te_tx_169";
chr1	transcript	119305508	119320576	+	transcript_id "te_tx_170.2"; gene_id "te_tx_170";
chr1	exon	119305508	119305707	+	transcript_id "te_tx_170.2"; gene_id "te_tx_170";
chr1	exon	119319312	119320576	+	transcript_id "te_tx_170.2"; gene_id "te_tx_170";
chr1	transcript	119310144	119320576	+	transcript_id "te_tx_170.4"; gene_id "te_tx_170";
chr1	exon	119310144	119310170	+	transcript_id "te_tx_170.4"; gene_id "te_tx_170";
chr1	exon	119319312	119320576	+	transcript_id "te_tx_170.4"; gene_id "te_tx_170";
chr1	transcript	119306206	119320576	+	transcript_id "te_tx_170.3"; gene_id "te_tx_170";
chr1	exon	119306206	119306597	+	transcript_id "te_tx_170.3"; gene_id "te_tx_170";
chr1	exon	119319312	119320576	+	transcript_id "te_tx_170.3"; gene_id "te_tx_170";
chr1	transcript	119303009	119320576	+	transcript_id "te_tx_170.1"; gene_id "te_tx_170";
chr1	exon	119303009	119303112	+	transcript_id "te_tx_170.1"; gene_id "te_tx_170";
chr1	exon	119319312	119320576	+	transcript_id "te_tx_170.1"; gene_id "te_tx_170";
chr1	transcript	119440054	119444351	-	transcript_id "te_tx_171.1"; gene_id "te_tx_171";
chr1	exon	119440054	119440619	-	transcript_id "te_tx_171.1"; gene_id "te_tx_171";
chr1	exon	119444037	119444351	-	transcript_id "te_tx_171.1"; gene_id "te_tx_171";
chr1	transcript	119440054	119443762	-	transcript_id "te_tx_171.2"; gene_id "te_tx_171";
chr1	exon	119440054	119440619	-	transcript_id "te_tx_171.2"; gene_id "te_tx_171";
chr1	exon	119443626	119443762	-	transcript_id "te_tx_171.2"; gene_id "te_tx_171";
chr1	transcript	119522997	119525284	+	transcript_id "te_tx_172.1"; gene_id "te_tx_172";
chr1	exon	119522997	119523207	+	transcript_id "te_tx_172.1"; gene_id "te_tx_172";
chr1	exon	119523435	119525284	+	transcript_id "te_tx_172.1"; gene_id "te_tx_172";
chr1	transcript	119889797	119897832	-	transcript_id "te_tx_173.1"; gene_id "te_tx_173";
chr1	exon	119889797	119889865	-	transcript_id "te_tx_173.1"; gene_id "te_tx_173";
chr1	exon	119893956	119894170	-	transcript_id "te_tx_173.1"; gene_id "te_tx_173";
chr1	exon	119896833	119897036	-	transcript_id "te_tx_173.1"; gene_id "te_tx_173";
chr1	exon	119897635	119897832	-	transcript_id "te_tx_173.1"; gene_id "te_tx_173";
chr1	transcript	120076084	120089310	-	transcript_id "te_tx_174.1"; gene_id "te_tx_174";
chr1	exon	120076084	120076266	-	transcript_id "te_tx_174.1"; gene_id "te_tx_174";
chr1	exon	120088272	120088483	-	transcript_id "te_tx_174.1"; gene_id "te_tx_174";
chr1	exon	120088571	120088667	-	transcript_id "te_tx_174.1"; gene_id "te_tx_174";
chr1	exon	120089254	120089310	-	transcript_id "te_tx_174.1"; gene_id "te_tx_174";
chr1	transcript	120292496	120300828	-	transcript_id "te_tx_175.1"; gene_id "te_tx_175";
chr1	exon	120292496	120293355	-	transcript_id "te_tx_175.1"; gene_id "te_tx_175";
chr1	exon	120293526	120293629	-	transcript_id "te_tx_175.1"; gene_id "te_tx_175";
chr1	exon	120295187	120295470	-	transcript_id "te_tx_175.1"; gene_id "te_tx_175";
chr1	exon	120296051	120296177	-	transcript_id "te_tx_175.1"; gene_id "te_tx_175";
chr1	exon	120296275	120296385	-	transcript_id "te_tx_175.1"; gene_id "te_tx_175";
chr1	exon	120300519	120300574	-	transcript_id "te_tx_175.1"; gene_id "te_tx_175";
chr1	exon	120300675	120300828	-	transcript_id "te_tx_175.1"; gene_id "te_tx_175";
chr1	transcript	120292496	120300578	-	transcript_id "te_tx_175.2"; gene_id "te_tx_175";
chr1	exon	120292496	120293207	-	transcript_id "te_tx_175.2"; gene_id "te_tx_175";
chr1	exon	120293526	120293629	-	transcript_id "te_tx_175.2"; gene_id "te_tx_175";
chr1	exon	120295187	120295470	-	transcript_id "te_tx_175.2"; gene_id "te_tx_175";
chr1	exon	120296051	120296177	-	transcript_id "te_tx_175.2"; gene_id "te_tx_175";
chr1	exon	120296275	120296385	-	transcript_id "te_tx_175.2"; gene_id "te_tx_175";
chr1	exon	120300519	120300578	-	transcript_id "te_tx_175.2"; gene_id "te_tx_175";
chr1	transcript	120614416	120663674	+	transcript_id "te_tx_176.1"; gene_id "te_tx_176";
chr1	exon	120614416	120614739	+	transcript_id "te_tx_176.1"; gene_id "te_tx_176";
chr1	exon	120619387	120619472	+	transcript_id "te_tx_176.1"; gene_id "te_tx_176";
chr1	exon	120663384	120663674	+	transcript_id "te_tx_176.1"; gene_id "te_tx_176";
chr1	transcript	120614416	120617380	+	transcript_id "te_tx_176.2"; gene_id "te_tx_176";
chr1	exon	120614416	120614739	+	transcript_id "te_tx_176.2"; gene_id "te_tx_176";
chr1	exon	120617222	120617380	+	transcript_id "te_tx_176.2"; gene_id "te_tx_176";
chr1	transcript	120614416	120648015	+	transcript_id "te_tx_176.3"; gene_id "te_tx_176";
chr1	exon	120614416	120614739	+	transcript_id "te_tx_176.3"; gene_id "te_tx_176";
chr1	exon	120647732	120648015	+	transcript_id "te_tx_176.3"; gene_id "te_tx_176";
chr1	transcript	126939172	126944384	+	transcript_id "te_tx_177.1"; gene_id "te_tx_177";
chr1	exon	126939172	126939768	+	transcript_id "te_tx_177.1"; gene_id "te_tx_177";
chr1	exon	126942846	126944384	+	transcript_id "te_tx_177.1"; gene_id "te_tx_177";
chr1	transcript	127876021	127894084	-	transcript_id "te_tx_178.1"; gene_id "te_tx_178";
chr1	exon	127876021	127876354	-	transcript_id "te_tx_178.1"; gene_id "te_tx_178";
chr1	exon	127893318	127894084	-	transcript_id "te_tx_178.1"; gene_id "te_tx_178";
chr1	transcript	127876021	127882184	-	transcript_id "te_tx_178.2"; gene_id "te_tx_178";
chr1	exon	127876021	127876610	-	transcript_id "te_tx_178.2"; gene_id "te_tx_178";
chr1	exon	127881645	127882184	-	transcript_id "te_tx_178.2"; gene_id "te_tx_178";
chr1	transcript	127928504	127928960	+	transcript_id "te_tx_179.1"; gene_id "te_tx_179";
chr1	exon	127928504	127928734	+	transcript_id "te_tx_179.1"; gene_id "te_tx_179";
chr1	exon	127928907	127928960	+	transcript_id "te_tx_179.1"; gene_id "te_tx_179";
chr1	transcript	128675645	128677028	+	transcript_id "te_tx_180.1"; gene_id "te_tx_180";
chr1	exon	128675645	128675759	+	transcript_id "te_tx_180.1"; gene_id "te_tx_180";
chr1	exon	128676921	128677028	+	transcript_id "te_tx_180.1"; gene_id "te_tx_180";
chr1	transcript	128701217	128702324	+	transcript_id "te_tx_181.2"; gene_id "te_tx_181";
chr1	exon	128701217	128701531	+	transcript_id "te_tx_181.2"; gene_id "te_tx_181";
chr1	exon	128702297	128702324	+	transcript_id "te_tx_181.2"; gene_id "te_tx_181";
chr1	transcript	128698020	128701706	+	transcript_id "te_tx_181.1"; gene_id "te_tx_181";
chr1	exon	128698020	128698357	+	transcript_id "te_tx_181.1"; gene_id "te_tx_181";
chr1	exon	128701363	128701706	+	transcript_id "te_tx_181.1"; gene_id "te_tx_181";
chr1	transcript	130272343	130281458	+	transcript_id "te_tx_182.1"; gene_id "te_tx_182";
chr1	exon	130272343	130272478	+	transcript_id "te_tx_182.1"; gene_id "te_tx_182";
chr1	exon	130274395	130274500	+	transcript_id "te_tx_182.1"; gene_id "te_tx_182";
chr1	exon	130281278	130281458	+	transcript_id "te_tx_182.1"; gene_id "te_tx_182";
chr1	transcript	130424131	130424439	-	transcript_id "te_tx_183.1"; gene_id "te_tx_183";
chr1	exon	130424131	130424244	-	transcript_id "te_tx_183.1"; gene_id "te_tx_183";
chr1	exon	130424269	130424439	-	transcript_id "te_tx_183.1"; gene_id "te_tx_183";
chr1	transcript	130431283	130438047	-	transcript_id "te_tx_184.1"; gene_id "te_tx_184";
chr1	exon	130431283	130432225	-	transcript_id "te_tx_184.1"; gene_id "te_tx_184";
chr1	exon	130435672	130435820	-	transcript_id "te_tx_184.1"; gene_id "te_tx_184";
chr1	exon	130436105	130438047	-	transcript_id "te_tx_184.1"; gene_id "te_tx_184";
chr1	transcript	130534278	130539607	+	transcript_id "te_tx_185.1"; gene_id "te_tx_185";
chr1	exon	130534278	130534303	+	transcript_id "te_tx_185.1"; gene_id "te_tx_185";
chr1	exon	130539230	130539607	+	transcript_id "te_tx_185.1"; gene_id "te_tx_185";
chr1	transcript	130541032	130541785	+	transcript_id "te_tx_186.1"; gene_id "te_tx_186";
chr1	exon	130541032	130541224	+	transcript_id "te_tx_186.1"; gene_id "te_tx_186";
chr1	exon	130541476	130541785	+	transcript_id "te_tx_186.1"; gene_id "te_tx_186";
chr1	transcript	131994629	132010603	-	transcript_id "te_tx_187.1"; gene_id "te_tx_187";
chr1	exon	131994629	131994735	-	transcript_id "te_tx_187.1"; gene_id "te_tx_187";
chr1	exon	132010448	132010603	-	transcript_id "te_tx_187.1"; gene_id "te_tx_187";
chr1	transcript	132267458	132278489	-	transcript_id "te_tx_188.1"; gene_id "te_tx_188";
chr1	exon	132267458	132268666	-	transcript_id "te_tx_188.1"; gene_id "te_tx_188";
chr1	exon	132274716	132274821	-	transcript_id "te_tx_188.1"; gene_id "te_tx_188";
chr1	exon	132275024	132275136	-	transcript_id "te_tx_188.1"; gene_id "te_tx_188";
chr1	exon	132278340	132278489	-	transcript_id "te_tx_188.1"; gene_id "te_tx_188";
chr1	transcript	132279261	132280582	-	transcript_id "te_tx_189.1"; gene_id "te_tx_189";
chr1	exon	132279261	132279483	-	transcript_id "te_tx_189.1"; gene_id "te_tx_189";
chr1	exon	132280374	132280582	-	transcript_id "te_tx_189.1"; gene_id "te_tx_189";
chr1	transcript	132279261	132291265	-	transcript_id "te_tx_189.2"; gene_id "te_tx_189";
chr1	exon	132279261	132279483	-	transcript_id "te_tx_189.2"; gene_id "te_tx_189";
chr1	exon	132280374	132280528	-	transcript_id "te_tx_189.2"; gene_id "te_tx_189";
chr1	exon	132291046	132291265	-	transcript_id "te_tx_189.2"; gene_id "te_tx_189";
chr1	transcript	132293384	132297366	+	transcript_id "te_tx_190.1"; gene_id "te_tx_190";
chr1	exon	132293384	132293401	+	transcript_id "te_tx_190.1"; gene_id "te_tx_190";
chr1	exon	132293552	132293677	+	transcript_id "te_tx_190.1"; gene_id "te_tx_190";
chr1	exon	132296820	132297366	+	transcript_id "te_tx_190.1"; gene_id "te_tx_190";
chr1	transcript	132470238	132472345	+	transcript_id "te_tx_191.1"; gene_id "te_tx_191";
chr1	exon	132470238	132470387	+	transcript_id "te_tx_191.1"; gene_id "te_tx_191";
chr1	exon	132472022	132472345	+	transcript_id "te_tx_191.1"; gene_id "te_tx_191";
chr1	transcript	133649516	133651166	+	transcript_id "te_tx_192.1"; gene_id "te_tx_192";
chr1	exon	133649516	133649766	+	transcript_id "te_tx_192.1"; gene_id "te_tx_192";
chr1	exon	133651107	133651166	+	transcript_id "te_tx_192.1"; gene_id "te_tx_192";
chr1	transcript	133667986	133677145	+	transcript_id "te_tx_193.1"; gene_id "te_tx_193";
chr1	exon	133667986	133668068	+	transcript_id "te_tx_193.1"; gene_id "te_tx_193";
chr1	exon	133675991	133677145	+	transcript_id "te_tx_193.1"; gene_id "te_tx_193";
chr1	transcript	133691732	133692723	+	transcript_id "te_tx_194.1"; gene_id "te_tx_194";
chr1	exon	133691732	133692309	+	transcript_id "te_tx_194.1"; gene_id "te_tx_194";
chr1	exon	133692405	133692723	+	transcript_id "te_tx_194.1"; gene_id "te_tx_194";
chr1	transcript	134059893	134060952	-	transcript_id "te_tx_195.1"; gene_id "te_tx_195";
chr1	exon	134059893	134060453	-	transcript_id "te_tx_195.1"; gene_id "te_tx_195";
chr1	exon	134060793	134060952	-	transcript_id "te_tx_195.1"; gene_id "te_tx_195";
chr1	transcript	134059893	134070037	-	transcript_id "te_tx_195.2"; gene_id "te_tx_195";
chr1	exon	134059893	134060453	-	transcript_id "te_tx_195.2"; gene_id "te_tx_195";
chr1	exon	134070009	134070037	-	transcript_id "te_tx_195.2"; gene_id "te_tx_195";
chr1	transcript	134082962	134084589	+	transcript_id "te_tx_196.1"; gene_id "te_tx_196";
chr1	exon	134082962	134083009	+	transcript_id "te_tx_196.1"; gene_id "te_tx_196";
chr1	exon	134083963	134084589	+	transcript_id "te_tx_196.1"; gene_id "te_tx_196";
chr1	transcript	134435649	134454968	+	transcript_id "te_tx_197.1"; gene_id "te_tx_197";
chr1	exon	134435649	134435870	+	transcript_id "te_tx_197.1"; gene_id "te_tx_197";
chr1	exon	134454784	134454968	+	transcript_id "te_tx_197.1"; gene_id "te_tx_197";
chr1	transcript	135515457	135532161	+	transcript_id "te_tx_198.1"; gene_id "te_tx_198";
chr1	exon	135515457	135515598	+	transcript_id "te_tx_198.1"; gene_id "te_tx_198";
chr1	exon	135520888	135521043	+	transcript_id "te_tx_198.1"; gene_id "te_tx_198";
chr1	exon	135527648	135528005	+	transcript_id "te_tx_198.1"; gene_id "te_tx_198";
chr1	exon	135532002	135532161	+	transcript_id "te_tx_198.1"; gene_id "te_tx_198";
chr1	transcript	135515457	135523060	+	transcript_id "te_tx_198.2"; gene_id "te_tx_198";
chr1	exon	135515457	135515598	+	transcript_id "te_tx_198.2"; gene_id "te_tx_198";
chr1	exon	135520888	135521043	+	transcript_id "te_tx_198.2"; gene_id "te_tx_198";
chr1	exon	135523043	135523060	+	transcript_id "te_tx_198.2"; gene_id "te_tx_198";
chr1	transcript	135515457	135521089	+	transcript_id "te_tx_198.3"; gene_id "te_tx_198";
chr1	exon	135515457	135515598	+	transcript_id "te_tx_198.3"; gene_id "te_tx_198";
chr1	exon	135520888	135521089	+	transcript_id "te_tx_198.3"; gene_id "te_tx_198";
chr1	transcript	136102544	136103842	-	transcript_id "te_tx_199.1"; gene_id "te_tx_199";
chr1	exon	136102544	136102625	-	transcript_id "te_tx_199.1"; gene_id "te_tx_199";
chr1	exon	136103580	136103842	-	transcript_id "te_tx_199.1"; gene_id "te_tx_199";
chr1	transcript	136375715	136400995	+	transcript_id "te_tx_200.1"; gene_id "te_tx_200";
chr1	exon	136375715	136375868	+	transcript_id "te_tx_200.1"; gene_id "te_tx_200";
chr1	exon	136399075	136400995	+	transcript_id "te_tx_200.1"; gene_id "te_tx_200";
chr1	transcript	136541608	136542996	+	transcript_id "te_tx_201.1"; gene_id "te_tx_201";
chr1	exon	136541608	136541823	+	transcript_id "te_tx_201.1"; gene_id "te_tx_201";
chr1	exon	136542850	136542996	+	transcript_id "te_tx_201.1"; gene_id "te_tx_201";
chr1	transcript	136545042	136555918	+	transcript_id "te_tx_202.1"; gene_id "te_tx_202";
chr1	exon	136545042	136545160	+	transcript_id "te_tx_202.1"; gene_id "te_tx_202";
chr1	exon	136555592	136555918	+	transcript_id "te_tx_202.1"; gene_id "te_tx_202";
chr1	transcript	136678900	136690761	+	transcript_id "te_tx_203.13"; gene_id "te_tx_203";
chr1	exon	136678900	136679527	+	transcript_id "te_tx_203.13"; gene_id "te_tx_203";
chr1	exon	136681469	136681562	+	transcript_id "te_tx_203.13"; gene_id "te_tx_203";
chr1	exon	136688744	136690196	+	transcript_id "te_tx_203.13"; gene_id "te_tx_203";
chr1	exon	136690537	136690761	+	transcript_id "te_tx_203.13"; gene_id "te_tx_203";
chr1	transcript	136689450	136690761	+	transcript_id "te_tx_203.19"; gene_id "te_tx_203";
chr1	exon	136689450	136690196	+	transcript_id "te_tx_203.19"; gene_id "te_tx_203";
chr1	exon	136690537	136690761	+	transcript_id "te_tx_203.19"; gene_id "te_tx_203";
chr1	transcript	136662071	136690761	+	transcript_id "te_tx_203.1"; gene_id "te_tx_203";
chr1	exon	136662071	136662264	+	transcript_id "te_tx_203.1"; gene_id "te_tx_203";
chr1	exon	136675142	136677261	+	transcript_id "te_tx_203.1"; gene_id "te_tx_203";
chr1	exon	136681469	136681562	+	transcript_id "te_tx_203.1"; gene_id "te_tx_203";
chr1	exon	136688744	136690196	+	transcript_id "te_tx_203.1"; gene_id "te_tx_203";
chr1	exon	136690537	136690761	+	transcript_id "te_tx_203.1"; gene_id "te_tx_203";
chr1	transcript	136670535	136690761	+	transcript_id "te_tx_203.4"; gene_id "te_tx_203";
chr1	exon	136670535	136670932	+	transcript_id "te_tx_203.4"; gene_id "te_tx_203";
chr1	exon	136675142	136675283	+	transcript_id "te_tx_203.4"; gene_id "te_tx_203";
chr1	exon	136676248	136676686	+	transcript_id "te_tx_203.4"; gene_id "te_tx_203";
chr1	exon	136677123	136677261	+	transcript_id "te_tx_203.4"; gene_id "te_tx_203";
chr1	exon	136681469	136681562	+	transcript_id "te_tx_203.4"; gene_id "te_tx_203";
chr1	exon	136688744	136688810	+	transcript_id "te_tx_203.4"; gene_id "te_tx_203";
chr1	exon	136690147	136690196	+	transcript_id "te_tx_203.4"; gene_id "te_tx_203";
chr1	exon	136690537	136690761	+	transcript_id "te_tx_203.4"; gene_id "te_tx_203";
chr1	transcript	136675112	136690761	+	transcript_id "te_tx_203.12"; gene_id "te_tx_203";
chr1	exon	136675112	136675283	+	transcript_id "te_tx_203.12"; gene_id "te_tx_203";
chr1	exon	136677123	136677261	+	transcript_id "te_tx_203.12"; gene_id "te_tx_203";
chr1	exon	136681469	136681562	+	transcript_id "te_tx_203.12"; gene_id "te_tx_203";
chr1	exon	136688744	136688810	+	transcript_id "te_tx_203.12"; gene_id "te_tx_203";
chr1	exon	136690537	136690761	+	transcript_id "te_tx_203.12"; gene_id "te_tx_203";
chr1	transcript	136662071	136690761	+	transcript_id "te_tx_203.2"; gene_id "te_tx_203";
chr1	exon	136662071	136662264	+	transcript_id "te_tx_203.2"; gene_id "te_tx_203";
chr1	exon	136675142	136675283	+	transcript_id "te_tx_203.2"; gene_id "te_tx_203";
chr1	exon	136677123	136677261	+	transcript_id "te_tx_203.2"; gene_id "te_tx_203";
chr1	exon	136681469	136681562	+	transcript_id "te_tx_203.2"; gene_id "te_tx_203";
chr1	exon	136688744	136688810	+	transcript_id "te_tx_203.2"; gene_id "te_tx_203";
chr1	exon	136690537	136690761	+	transcript_id "te_tx_203.2"; gene_id "te_tx_203";
chr1	transcript	136662071	136690761	+	transcript_id "te_tx_203.3"; gene_id "te_tx_203";
chr1	exon	136662071	136662264	+	transcript_id "te_tx_203.3"; gene_id "te_tx_203";
chr1	exon	136667264	136667325	+	transcript_id "te_tx_203.3"; gene_id "te_tx_203";
chr1	exon	136669624	136669714	+	transcript_id "te_tx_203.3"; gene_id "te_tx_203";
chr1	exon	136675139	136677266	+	transcript_id "te_tx_203.3"; gene_id "te_tx_203";
chr1	exon	136681469	136681562	+	transcript_id "te_tx_203.3"; gene_id "te_tx_203";
chr1	exon	136688744	136688810	+	transcript_id "te_tx_203.3"; gene_id "te_tx_203";
chr1	exon	136690537	136690761	+	transcript_id "te_tx_203.3"; gene_id "te_tx_203";
chr1	transcript	136674528	136690761	+	transcript_id "te_tx_203.10"; gene_id "te_tx_203";
chr1	exon	136674528	136674924	+	transcript_id "te_tx_203.10"; gene_id "te_tx_203";
chr1	exon	136675142	136675283	+	transcript_id "te_tx_203.10"; gene_id "te_tx_203";
chr1	exon	136677123	136677266	+	transcript_id "te_tx_203.10"; gene_id "te_tx_203";
chr1	exon	136681469	136681562	+	transcript_id "te_tx_203.10"; gene_id "te_tx_203";
chr1	exon	136688744	136688810	+	transcript_id "te_tx_203.10"; gene_id "te_tx_203";
chr1	exon	136690147	136690196	+	transcript_id "te_tx_203.10"; gene_id "te_tx_203";
chr1	exon	136690537	136690761	+	transcript_id "te_tx_203.10"; gene_id "te_tx_203";
chr1	transcript	136683324	136690761	+	transcript_id "te_tx_203.15"; gene_id "te_tx_203";
chr1	exon	136683324	136683473	+	transcript_id "te_tx_203.15"; gene_id "te_tx_203";
chr1	exon	136688744	136688810	+	transcript_id "te_tx_203.15"; gene_id "te_tx_203";
chr1	exon	136690147	136690196	+	transcript_id "te_tx_203.15"; gene_id "te_tx_203";
chr1	exon	136690537	136690761	+	transcript_id "te_tx_203.15"; gene_id "te_tx_203";
chr1	transcript	136689450	136690805	+	transcript_id "te_tx_203.20"; gene_id "te_tx_203";
chr1	exon	136689450	136690196	+	transcript_id "te_tx_203.20"; gene_id "te_tx_203";
chr1	exon	136690537	136690805	+	transcript_id "te_tx_203.20"; gene_id "te_tx_203";
chr1	transcript	136670535	136690761	+	transcript_id "te_tx_203.5"; gene_id "te_tx_203";
chr1	exon	136670535	136670932	+	transcript_id "te_tx_203.5"; gene_id "te_tx_203";
chr1	exon	136675139	136675283	+	transcript_id "te_tx_203.5"; gene_id "te_tx_203";
chr1	exon	136677123	136677266	+	transcript_id "te_tx_203.5"; gene_id "te_tx_203";
chr1	exon	136681469	136681562	+	transcript_id "te_tx_203.5"; gene_id "te_tx_203";
chr1	exon	136688744	136688810	+	transcript_id "te_tx_203.5"; gene_id "te_tx_203";
chr1	exon	136690537	136690761	+	transcript_id "te_tx_203.5"; gene_id "te_tx_203";
chr1	transcript	136673081	136682835	+	transcript_id "te_tx_203.8"; gene_id "te_tx_203";
chr1	exon	136673081	136673210	+	transcript_id "te_tx_203.8"; gene_id "te_tx_203";
chr1	exon	136675139	136675283	+	transcript_id "te_tx_203.8"; gene_id "te_tx_203";
chr1	exon	136676248	136677261	+	transcript_id "te_tx_203.8"; gene_id "te_tx_203";
chr1	exon	136681469	136681562	+	transcript_id "te_tx_203.8"; gene_id "te_tx_203";
chr1	exon	136682502	136682835	+	transcript_id "te_tx_203.8"; gene_id "te_tx_203";
chr1	transcript	136674528	136690761	+	transcript_id "te_tx_203.11"; gene_id "te_tx_203";
chr1	exon	136674528	136674924	+	transcript_id "te_tx_203.11"; gene_id "te_tx_203";
chr1	exon	136675142	136675283	+	transcript_id "te_tx_203.11"; gene_id "te_tx_203";
chr1	exon	136677123	136677261	+	transcript_id "te_tx_203.11"; gene_id "te_tx_203";
chr1	exon	136681469	136681562	+	transcript_id "te_tx_203.11"; gene_id "te_tx_203";
chr1	exon	136683339	136683473	+	transcript_id "te_tx_203.11"; gene_id "te_tx_203";
chr1	exon	136688744	136688810	+	transcript_id "te_tx_203.11"; gene_id "te_tx_203";
chr1	exon	136690537	136690761	+	transcript_id "te_tx_203.11"; gene_id "te_tx_203";
chr1	transcript	136681430	136690761	+	transcript_id "te_tx_203.14"; gene_id "te_tx_203";
chr1	exon	136681430	136681562	+	transcript_id "te_tx_203.14"; gene_id "te_tx_203";
chr1	exon	136688744	136688810	+	transcript_id "te_tx_203.14"; gene_id "te_tx_203";
chr1	exon	136690537	136690761	+	transcript_id "te_tx_203.14"; gene_id "te_tx_203";
chr1	transcript	136673081	136682835	+	transcript_id "te_tx_203.9"; gene_id "te_tx_203";
chr1	exon	136673081	136673210	+	transcript_id "te_tx_203.9"; gene_id "te_tx_203";
chr1	exon	136675142	136675283	+	transcript_id "te_tx_203.9"; gene_id "te_tx_203";
chr1	exon	136677123	136677266	+	transcript_id "te_tx_203.9"; gene_id "te_tx_203";
chr1	exon	136681469	136681562	+	transcript_id "te_tx_203.9"; gene_id "te_tx_203";
chr1	exon	136682502	136682835	+	transcript_id "te_tx_203.9"; gene_id "te_tx_203";
chr1	transcript	136683526	136690761	+	transcript_id "te_tx_203.17"; gene_id "te_tx_203";
chr1	exon	136683526	136683703	+	transcript_id "te_tx_203.17"; gene_id "te_tx_203";
chr1	exon	136688744	136688810	+	transcript_id "te_tx_203.17"; gene_id "te_tx_203";
chr1	exon	136690537	136690761	+	transcript_id "te_tx_203.17"; gene_id "te_tx_203";
chr1	transcript	136683526	136690805	+	transcript_id "te_tx_203.18"; gene_id "te_tx_203";
chr1	exon	136683526	136683703	+	transcript_id "te_tx_203.18"; gene_id "te_tx_203";
chr1	exon	136688744	136688810	+	transcript_id "te_tx_203.18"; gene_id "te_tx_203";
chr1	exon	136690537	136690805	+	transcript_id "te_tx_203.18"; gene_id "te_tx_203";
chr1	transcript	136683324	136690761	+	transcript_id "te_tx_203.16"; gene_id "te_tx_203";
chr1	exon	136683324	136683473	+	transcript_id "te_tx_203.16"; gene_id "te_tx_203";
chr1	exon	136688744	136688810	+	transcript_id "te_tx_203.16"; gene_id "te_tx_203";
chr1	exon	136690537	136690761	+	transcript_id "te_tx_203.16"; gene_id "te_tx_203";
chr1	transcript	136670535	136682835	+	transcript_id "te_tx_203.6"; gene_id "te_tx_203";
chr1	exon	136670535	136670932	+	transcript_id "te_tx_203.6"; gene_id "te_tx_203";
chr1	exon	136675139	136677266	+	transcript_id "te_tx_203.6"; gene_id "te_tx_203";
chr1	exon	136681469	136682835	+	transcript_id "te_tx_203.6"; gene_id "te_tx_203";
chr1	transcript	136670535	136690761	+	transcript_id "te_tx_203.7"; gene_id "te_tx_203";
chr1	exon	136670535	136670932	+	transcript_id "te_tx_203.7"; gene_id "te_tx_203";
chr1	exon	136675139	136677261	+	transcript_id "te_tx_203.7"; gene_id "te_tx_203";
chr1	exon	136681469	136681562	+	transcript_id "te_tx_203.7"; gene_id "te_tx_203";
chr1	exon	136688744	136688810	+	transcript_id "te_tx_203.7"; gene_id "te_tx_203";
chr1	exon	136690537	136690761	+	transcript_id "te_tx_203.7"; gene_id "te_tx_203";
chr1	transcript	136675973	136680826	-	transcript_id "te_tx_204.1"; gene_id "te_tx_204";
chr1	exon	136675973	136676460	-	transcript_id "te_tx_204.1"; gene_id "te_tx_204";
chr1	exon	136680476	136680569	-	transcript_id "te_tx_204.1"; gene_id "te_tx_204";
chr1	exon	136680677	136680826	-	transcript_id "te_tx_204.1"; gene_id "te_tx_204";
chr1	transcript	136684146	136686962	-	transcript_id "te_tx_205.1"; gene_id "te_tx_205";
chr1	exon	136684146	136684598	-	transcript_id "te_tx_205.1"; gene_id "te_tx_205";
chr1	exon	136686817	136686962	-	transcript_id "te_tx_205.1"; gene_id "te_tx_205";
chr1	transcript	136696115	136714447	+	transcript_id "te_tx_206.1"; gene_id "te_tx_206";
chr1	exon	136696115	136696391	+	transcript_id "te_tx_206.1"; gene_id "te_tx_206";
chr1	exon	136705539	136714447	+	transcript_id "te_tx_206.1"; gene_id "te_tx_206";
chr1	transcript	136696115	136729101	+	transcript_id "te_tx_206.2"; gene_id "te_tx_206";
chr1	exon	136696115	136696391	+	transcript_id "te_tx_206.2"; gene_id "te_tx_206";
chr1	exon	136705539	136705642	+	transcript_id "te_tx_206.2"; gene_id "te_tx_206";
chr1	exon	136724971	136729101	+	transcript_id "te_tx_206.2"; gene_id "te_tx_206";
chr1	transcript	136696115	136729101	+	transcript_id "te_tx_206.3"; gene_id "te_tx_206";
chr1	exon	136696115	136696391	+	transcript_id "te_tx_206.3"; gene_id "te_tx_206";
chr1	exon	136705539	136705642	+	transcript_id "te_tx_206.3"; gene_id "te_tx_206";
chr1	exon	136724489	136724678	+	transcript_id "te_tx_206.3"; gene_id "te_tx_206";
chr1	exon	136724788	136724839	+	transcript_id "te_tx_206.3"; gene_id "te_tx_206";
chr1	exon	136724971	136729101	+	transcript_id "te_tx_206.3"; gene_id "te_tx_206";
chr1	transcript	136724480	136729101	+	transcript_id "te_tx_206.7"; gene_id "te_tx_206";
chr1	exon	136724480	136724678	+	transcript_id "te_tx_206.7"; gene_id "te_tx_206";
chr1	exon	136724788	136724839	+	transcript_id "te_tx_206.7"; gene_id "te_tx_206";
chr1	exon	136724971	136729101	+	transcript_id "te_tx_206.7"; gene_id "te_tx_206";
chr1	transcript	136724715	136729101	+	transcript_id "te_tx_206.8"; gene_id "te_tx_206";
chr1	exon	136724715	136724839	+	transcript_id "te_tx_206.8"; gene_id "te_tx_206";
chr1	exon	136724971	136729101	+	transcript_id "te_tx_206.8"; gene_id "te_tx_206";
chr1	transcript	136696115	136729101	+	transcript_id "te_tx_206.4"; gene_id "te_tx_206";
chr1	exon	136696115	136696391	+	transcript_id "te_tx_206.4"; gene_id "te_tx_206";
chr1	exon	136705539	136705642	+	transcript_id "te_tx_206.4"; gene_id "te_tx_206";
chr1	exon	136724485	136724678	+	transcript_id "te_tx_206.4"; gene_id "te_tx_206";
chr1	exon	136724788	136729101	+	transcript_id "te_tx_206.4"; gene_id "te_tx_206";
chr1	transcript	136696115	136779151	+	transcript_id "te_tx_206.5"; gene_id "te_tx_206";
chr1	exon	136696115	136696391	+	transcript_id "te_tx_206.5"; gene_id "te_tx_206";
chr1	exon	136705539	136705642	+	transcript_id "te_tx_206.5"; gene_id "te_tx_206";
chr1	exon	136769268	136769370	+	transcript_id "te_tx_206.5"; gene_id "te_tx_206";
chr1	exon	136776138	136779151	+	transcript_id "te_tx_206.5"; gene_id "te_tx_206";
chr1	transcript	136696115	136729101	+	transcript_id "te_tx_206.6"; gene_id "te_tx_206";
chr1	exon	136696115	136696391	+	transcript_id "te_tx_206.6"; gene_id "te_tx_206";
chr1	exon	136724971	136729101	+	transcript_id "te_tx_206.6"; gene_id "te_tx_206";
chr1	transcript	137898605	137944319	+	transcript_id "te_tx_207.1"; gene_id "te_tx_207";
chr1	exon	137898605	137898785	+	transcript_id "te_tx_207.1"; gene_id "te_tx_207";
chr1	exon	137930915	137931039	+	transcript_id "te_tx_207.1"; gene_id "te_tx_207";
chr1	exon	137932962	137933021	+	transcript_id "te_tx_207.1"; gene_id "te_tx_207";
chr1	exon	137944108	137944319	+	transcript_id "te_tx_207.1"; gene_id "te_tx_207";
chr1	transcript	137898605	137931093	+	transcript_id "te_tx_207.2"; gene_id "te_tx_207";
chr1	exon	137898605	137898785	+	transcript_id "te_tx_207.2"; gene_id "te_tx_207";
chr1	exon	137930915	137931093	+	transcript_id "te_tx_207.2"; gene_id "te_tx_207";
chr1	transcript	137932680	137934299	+	transcript_id "te_tx_207.4"; gene_id "te_tx_207";
chr1	exon	137932680	137934299	+	transcript_id "te_tx_207.4"; gene_id "te_tx_207";
chr1	transcript	137898605	137934299	+	transcript_id "te_tx_207.3"; gene_id "te_tx_207";
chr1	exon	137898605	137898785	+	transcript_id "te_tx_207.3"; gene_id "te_tx_207";
chr1	exon	137930915	137931039	+	transcript_id "te_tx_207.3"; gene_id "te_tx_207";
chr1	exon	137932962	137934299	+	transcript_id "te_tx_207.3"; gene_id "te_tx_207";
chr1	transcript	139927919	139929682	-	transcript_id "te_tx_208.1"; gene_id "te_tx_208";
chr1	exon	139927919	139929682	-	transcript_id "te_tx_208.1"; gene_id "te_tx_208";
chr1	transcript	139927919	139930780	-	transcript_id "te_tx_208.2"; gene_id "te_tx_208";
chr1	exon	139927919	139929671	-	transcript_id "te_tx_208.2"; gene_id "te_tx_208";
chr1	exon	139930727	139930780	-	transcript_id "te_tx_208.2"; gene_id "te_tx_208";
chr1	transcript	140639115	140656425	-	transcript_id "te_tx_209.1"; gene_id "te_tx_209";
chr1	exon	140639115	140639950	-	transcript_id "te_tx_209.1"; gene_id "te_tx_209";
chr1	exon	140656328	140656425	-	transcript_id "te_tx_209.1"; gene_id "te_tx_209";
chr1	transcript	142359745	142590150	-	transcript_id "te_tx_210.1"; gene_id "te_tx_210";
chr1	exon	142359745	142360338	-	transcript_id "te_tx_210.1"; gene_id "te_tx_210";
chr1	exon	142589187	142590150	-	transcript_id "te_tx_210.1"; gene_id "te_tx_210";
chr1	transcript	143734643	143739508	-	transcript_id "te_tx_211.1"; gene_id "te_tx_211";
chr1	exon	143734643	143735299	-	transcript_id "te_tx_211.1"; gene_id "te_tx_211";
chr1	exon	143739477	143739508	-	transcript_id "te_tx_211.1"; gene_id "te_tx_211";
chr1	transcript	148274897	148279612	+	transcript_id "te_tx_212.1"; gene_id "te_tx_212";
chr1	exon	148274897	148279612	+	transcript_id "te_tx_212.1"; gene_id "te_tx_212";
chr1	transcript	148274897	148459559	+	transcript_id "te_tx_212.2"; gene_id "te_tx_212";
chr1	exon	148274897	148276842	+	transcript_id "te_tx_212.2"; gene_id "te_tx_212";
chr1	exon	148459390	148459559	+	transcript_id "te_tx_212.2"; gene_id "te_tx_212";
chr1	transcript	149506444	149508769	-	transcript_id "te_tx_213.1"; gene_id "te_tx_213";
chr1	exon	149506444	149508769	-	transcript_id "te_tx_213.1"; gene_id "te_tx_213";
chr1	transcript	150162147	150165057	-	transcript_id "te_tx_214.2"; gene_id "te_tx_214";
chr1	exon	150162147	150163151	-	transcript_id "te_tx_214.2"; gene_id "te_tx_214";
chr1	exon	150164814	150165057	-	transcript_id "te_tx_214.2"; gene_id "te_tx_214";
chr1	transcript	150158836	150165057	-	transcript_id "te_tx_214.1"; gene_id "te_tx_214";
chr1	exon	150158836	150158979	-	transcript_id "te_tx_214.1"; gene_id "te_tx_214";
chr1	exon	150162979	150163151	-	transcript_id "te_tx_214.1"; gene_id "te_tx_214";
chr1	exon	150164814	150165057	-	transcript_id "te_tx_214.1"; gene_id "te_tx_214";
chr1	transcript	151015343	151017588	-	transcript_id "te_tx_215.1"; gene_id "te_tx_215";
chr1	exon	151015343	151015472	-	transcript_id "te_tx_215.1"; gene_id "te_tx_215";
chr1	exon	151017484	151017588	-	transcript_id "te_tx_215.1"; gene_id "te_tx_215";
chr1	transcript	151133317	151155196	-	transcript_id "te_tx_216.1"; gene_id "te_tx_216";
chr1	exon	151133317	151133932	-	transcript_id "te_tx_216.1"; gene_id "te_tx_216";
chr1	exon	151154898	151155196	-	transcript_id "te_tx_216.1"; gene_id "te_tx_216";
chr1	transcript	151154896	151155196	-	transcript_id "te_tx_216.2"; gene_id "te_tx_216";
chr1	exon	151154896	151155196	-	transcript_id "te_tx_216.2"; gene_id "te_tx_216";
chr1	transcript	151139157	151142581	+	transcript_id "te_tx_217.1"; gene_id "te_tx_217";
chr1	exon	151139157	151141293	+	transcript_id "te_tx_217.1"; gene_id "te_tx_217";
chr1	exon	151141527	151141705	+	transcript_id "te_tx_217.1"; gene_id "te_tx_217";
chr1	exon	151142202	151142581	+	transcript_id "te_tx_217.1"; gene_id "te_tx_217";
chr1	transcript	151241466	151250815	-	transcript_id "te_tx_218.1"; gene_id "te_tx_218";
chr1	exon	151241466	151243019	-	transcript_id "te_tx_218.1"; gene_id "te_tx_218";
chr1	exon	151250559	151250815	-	transcript_id "te_tx_218.1"; gene_id "te_tx_218";
chr1	transcript	151569521	151571157	-	transcript_id "te_tx_219.1"; gene_id "te_tx_219";
chr1	exon	151569521	151570385	-	transcript_id "te_tx_219.1"; gene_id "te_tx_219";
chr1	exon	151571133	151571157	-	transcript_id "te_tx_219.1"; gene_id "te_tx_219";
chr1	transcript	151748673	151755224	-	transcript_id "te_tx_220.1"; gene_id "te_tx_220";
chr1	exon	151748673	151750228	-	transcript_id "te_tx_220.1"; gene_id "te_tx_220";
chr1	exon	151754918	151755224	-	transcript_id "te_tx_220.1"; gene_id "te_tx_220";
chr1	transcript	151748673	151750231	-	transcript_id "te_tx_220.2"; gene_id "te_tx_220";
chr1	exon	151748673	151750231	-	transcript_id "te_tx_220.2"; gene_id "te_tx_220";
chr1	transcript	152784549	152791391	-	transcript_id "te_tx_221.2"; gene_id "te_tx_221";
chr1	exon	152784549	152785133	-	transcript_id "te_tx_221.2"; gene_id "te_tx_221";
chr1	exon	152785248	152785427	-	transcript_id "te_tx_221.2"; gene_id "te_tx_221";
chr1	exon	152791084	152791160	-	transcript_id "te_tx_221.2"; gene_id "te_tx_221";
chr1	exon	152791271	152791391	-	transcript_id "te_tx_221.2"; gene_id "te_tx_221";
chr1	transcript	152777745	152791391	-	transcript_id "te_tx_221.1"; gene_id "te_tx_221";
chr1	exon	152777745	152777963	-	transcript_id "te_tx_221.1"; gene_id "te_tx_221";
chr1	exon	152791084	152791160	-	transcript_id "te_tx_221.1"; gene_id "te_tx_221";
chr1	exon	152791271	152791391	-	transcript_id "te_tx_221.1"; gene_id "te_tx_221";
chr1	transcript	152790936	152791205	-	transcript_id "te_tx_221.3"; gene_id "te_tx_221";
chr1	exon	152790936	152791205	-	transcript_id "te_tx_221.3"; gene_id "te_tx_221";
chr1	transcript	153378786	153387241	+	transcript_id "te_tx_222.1"; gene_id "te_tx_222";
chr1	exon	153378786	153379111	+	transcript_id "te_tx_222.1"; gene_id "te_tx_222";
chr1	exon	153386031	153387241	+	transcript_id "te_tx_222.1"; gene_id "te_tx_222";
chr1	transcript	153404238	153407792	-	transcript_id "te_tx_223.1"; gene_id "te_tx_223";
chr1	exon	153404238	153406601	-	transcript_id "te_tx_223.1"; gene_id "te_tx_223";
chr1	exon	153407602	153407792	-	transcript_id "te_tx_223.1"; gene_id "te_tx_223";
chr1	transcript	153897783	153899700	-	transcript_id "te_tx_224.1"; gene_id "te_tx_224";
chr1	exon	153897783	153898035	-	transcript_id "te_tx_224.1"; gene_id "te_tx_224";
chr1	exon	153899595	153899700	-	transcript_id "te_tx_224.1"; gene_id "te_tx_224";
chr1	transcript	154112290	154117609	-	transcript_id "te_tx_225.1"; gene_id "te_tx_225";
chr1	exon	154112290	154112329	-	transcript_id "te_tx_225.1"; gene_id "te_tx_225";
chr1	exon	154117440	154117609	-	transcript_id "te_tx_225.1"; gene_id "te_tx_225";
chr1	transcript	155036679	155055600	+	transcript_id "te_tx_226.1"; gene_id "te_tx_226";
chr1	exon	155036679	155036830	+	transcript_id "te_tx_226.1"; gene_id "te_tx_226";
chr1	exon	155055060	155055600	+	transcript_id "te_tx_226.1"; gene_id "te_tx_226";
chr1	transcript	155064846	155065991	-	transcript_id "te_tx_227.1"; gene_id "te_tx_227";
chr1	exon	155064846	155065020	-	transcript_id "te_tx_227.1"; gene_id "te_tx_227";
chr1	exon	155065216	155065395	-	transcript_id "te_tx_227.1"; gene_id "te_tx_227";
chr1	exon	155065722	155065991	-	transcript_id "te_tx_227.1"; gene_id "te_tx_227";
chr1	transcript	155065215	155079735	-	transcript_id "te_tx_227.2"; gene_id "te_tx_227";
chr1	exon	155065215	155065427	-	transcript_id "te_tx_227.2"; gene_id "te_tx_227";
chr1	exon	155079703	155079735	-	transcript_id "te_tx_227.2"; gene_id "te_tx_227";
chr1	transcript	155431642	155438586	-	transcript_id "te_tx_228.1"; gene_id "te_tx_228";
chr1	exon	155431642	155432265	-	transcript_id "te_tx_228.1"; gene_id "te_tx_228";
chr1	exon	155438410	155438586	-	transcript_id "te_tx_228.1"; gene_id "te_tx_228";
chr1	transcript	155520237	155527973	-	transcript_id "te_tx_229.1"; gene_id "te_tx_229";
chr1	exon	155520237	155521737	-	transcript_id "te_tx_229.1"; gene_id "te_tx_229";
chr1	exon	155527026	155527135	-	transcript_id "te_tx_229.1"; gene_id "te_tx_229";
chr1	exon	155527602	155527973	-	transcript_id "te_tx_229.1"; gene_id "te_tx_229";
chr1	transcript	155520237	155528364	-	transcript_id "te_tx_229.2"; gene_id "te_tx_229";
chr1	exon	155520237	155521737	-	transcript_id "te_tx_229.2"; gene_id "te_tx_229";
chr1	exon	155527026	155527135	-	transcript_id "te_tx_229.2"; gene_id "te_tx_229";
chr1	exon	155528198	155528364	-	transcript_id "te_tx_229.2"; gene_id "te_tx_229";
chr1	transcript	155971520	155986228	+	transcript_id "te_tx_230.1"; gene_id "te_tx_230";
chr1	exon	155971520	155972556	+	transcript_id "te_tx_230.1"; gene_id "te_tx_230";
chr1	exon	155986059	155986228	+	transcript_id "te_tx_230.1"; gene_id "te_tx_230";
chr1	transcript	156754711	156766537	+	transcript_id "te_tx_231.1"; gene_id "te_tx_231";
chr1	exon	156754711	156754921	+	transcript_id "te_tx_231.1"; gene_id "te_tx_231";
chr1	exon	156763004	156766537	+	transcript_id "te_tx_231.1"; gene_id "te_tx_231";
chr1	transcript	157412748	157420267	+	transcript_id "te_tx_232.1"; gene_id "te_tx_232";
chr1	exon	157412748	157413125	+	transcript_id "te_tx_232.1"; gene_id "te_tx_232";
chr1	exon	157413744	157413795	+	transcript_id "te_tx_232.1"; gene_id "te_tx_232";
chr1	exon	157419869	157420267	+	transcript_id "te_tx_232.1"; gene_id "te_tx_232";
chr1	transcript	157491074	157492525	+	transcript_id "te_tx_233.1"; gene_id "te_tx_233";
chr1	exon	157491074	157491721	+	transcript_id "te_tx_233.1"; gene_id "te_tx_233";
chr1	exon	157491908	157492525	+	transcript_id "te_tx_233.1"; gene_id "te_tx_233";
chr1	transcript	161315663	161333748	+	transcript_id "te_tx_234.1"; gene_id "te_tx_234";
chr1	exon	161315663	161315833	+	transcript_id "te_tx_234.1"; gene_id "te_tx_234";
chr1	exon	161333594	161333748	+	transcript_id "te_tx_234.1"; gene_id "te_tx_234";
chr1	transcript	161725678	161727687	-	transcript_id "te_tx_235.2"; gene_id "te_tx_235";
chr1	exon	161725678	161727014	-	transcript_id "te_tx_235.2"; gene_id "te_tx_235";
chr1	exon	161727132	161727687	-	transcript_id "te_tx_235.2"; gene_id "te_tx_235";
chr1	transcript	161725767	161727687	-	transcript_id "te_tx_235.3"; gene_id "te_tx_235";
chr1	exon	161725767	161727014	-	transcript_id "te_tx_235.3"; gene_id "te_tx_235";
chr1	exon	161727132	161727687	-	transcript_id "te_tx_235.3"; gene_id "te_tx_235";
chr1	transcript	161725767	161727687	-	transcript_id "te_tx_235.4"; gene_id "te_tx_235";
chr1	exon	161725767	161726306	-	transcript_id "te_tx_235.4"; gene_id "te_tx_235";
chr1	exon	161726640	161727014	-	transcript_id "te_tx_235.4"; gene_id "te_tx_235";
chr1	exon	161727132	161727687	-	transcript_id "te_tx_235.4"; gene_id "te_tx_235";
chr1	transcript	161725546	161727687	-	transcript_id "te_tx_235.1"; gene_id "te_tx_235";
chr1	exon	161725546	161726306	-	transcript_id "te_tx_235.1"; gene_id "te_tx_235";
chr1	exon	161726640	161727014	-	transcript_id "te_tx_235.1"; gene_id "te_tx_235";
chr1	exon	161727132	161727687	-	transcript_id "te_tx_235.1"; gene_id "te_tx_235";
chr1	transcript	161877486	161892854	+	transcript_id "te_tx_236.1"; gene_id "te_tx_236";
chr1	exon	161877486	161878040	+	transcript_id "te_tx_236.1"; gene_id "te_tx_236";
chr1	exon	161881202	161881449	+	transcript_id "te_tx_236.1"; gene_id "te_tx_236";
chr1	exon	161892147	161892223	+	transcript_id "te_tx_236.1"; gene_id "te_tx_236";
chr1	exon	161892734	161892854	+	transcript_id "te_tx_236.1"; gene_id "te_tx_236";
chr1	transcript	161877486	161883511	+	transcript_id "te_tx_236.2"; gene_id "te_tx_236";
chr1	exon	161877486	161878040	+	transcript_id "te_tx_236.2"; gene_id "te_tx_236";
chr1	exon	161881202	161883511	+	transcript_id "te_tx_236.2"; gene_id "te_tx_236";
chr1	transcript	162871624	162873266	+	transcript_id "te_tx_237.1"; gene_id "te_tx_237";
chr1	exon	162871624	162871698	+	transcript_id "te_tx_237.1"; gene_id "te_tx_237";
chr1	exon	162871811	162871891	+	transcript_id "te_tx_237.1"; gene_id "te_tx_237";
chr1	exon	162873165	162873266	+	transcript_id "te_tx_237.1"; gene_id "te_tx_237";
chr1	transcript	162871624	162873854	+	transcript_id "te_tx_237.2"; gene_id "te_tx_237";
chr1	exon	162871624	162871698	+	transcript_id "te_tx_237.2"; gene_id "te_tx_237";
chr1	exon	162871811	162871891	+	transcript_id "te_tx_237.2"; gene_id "te_tx_237";
chr1	exon	162873165	162873265	+	transcript_id "te_tx_237.2"; gene_id "te_tx_237";
chr1	exon	162873581	162873854	+	transcript_id "te_tx_237.2"; gene_id "te_tx_237";
chr1	transcript	164458478	164464531	+	transcript_id "te_tx_238.1"; gene_id "te_tx_238";
chr1	exon	164458478	164459740	+	transcript_id "te_tx_238.1"; gene_id "te_tx_238";
chr1	exon	164462376	164462598	+	transcript_id "te_tx_238.1"; gene_id "te_tx_238";
chr1	exon	164462757	164462837	+	transcript_id "te_tx_238.1"; gene_id "te_tx_238";
chr1	exon	164463688	164464531	+	transcript_id "te_tx_238.1"; gene_id "te_tx_238";
chr1	transcript	164460043	164464531	+	transcript_id "te_tx_238.2"; gene_id "te_tx_238";
chr1	exon	164460043	164462598	+	transcript_id "te_tx_238.2"; gene_id "te_tx_238";
chr1	exon	164462757	164462837	+	transcript_id "te_tx_238.2"; gene_id "te_tx_238";
chr1	exon	164463688	164464531	+	transcript_id "te_tx_238.2"; gene_id "te_tx_238";
chr1	transcript	164503178	164514458	+	transcript_id "te_tx_239.1"; gene_id "te_tx_239";
chr1	exon	164503178	164503544	+	transcript_id "te_tx_239.1"; gene_id "te_tx_239";
chr1	exon	164508205	164508335	+	transcript_id "te_tx_239.1"; gene_id "te_tx_239";
chr1	exon	164513227	164514458	+	transcript_id "te_tx_239.1"; gene_id "te_tx_239";
chr1	transcript	164503178	164569358	+	transcript_id "te_tx_239.2"; gene_id "te_tx_239";
chr1	exon	164503178	164503544	+	transcript_id "te_tx_239.2"; gene_id "te_tx_239";
chr1	exon	164508205	164508335	+	transcript_id "te_tx_239.2"; gene_id "te_tx_239";
chr1	exon	164568963	164569358	+	transcript_id "te_tx_239.2"; gene_id "te_tx_239";
chr1	transcript	164705437	164712560	-	transcript_id "te_tx_240.1"; gene_id "te_tx_240";
chr1	exon	164705437	164705920	-	transcript_id "te_tx_240.1"; gene_id "te_tx_240";
chr1	exon	164712316	164712560	-	transcript_id "te_tx_240.1"; gene_id "te_tx_240";
chr1	transcript	164707512	164712560	-	transcript_id "te_tx_240.2"; gene_id "te_tx_240";
chr1	exon	164707512	164707780	-	transcript_id "te_tx_240.2"; gene_id "te_tx_240";
chr1	exon	164712316	164712560	-	transcript_id "te_tx_240.2"; gene_id "te_tx_240";
chr1	transcript	165067827	165069043	-	transcript_id "te_tx_241.1"; gene_id "te_tx_241";
chr1	exon	165067827	165068092	-	transcript_id "te_tx_241.1"; gene_id "te_tx_241";
chr1	exon	165068458	165069043	-	transcript_id "te_tx_241.1"; gene_id "te_tx_241";
chr1	transcript	165102593	165113302	-	transcript_id "te_tx_242.1"; gene_id "te_tx_242";
chr1	exon	165102593	165103383	-	transcript_id "te_tx_242.1"; gene_id "te_tx_242";
chr1	exon	165108116	165113302	-	transcript_id "te_tx_242.1"; gene_id "te_tx_242";
chr1	transcript	165276306	165277770	-	transcript_id "te_tx_243.1"; gene_id "te_tx_243";
chr1	exon	165276306	165276571	-	transcript_id "te_tx_243.1"; gene_id "te_tx_243";
chr1	exon	165277748	165277770	-	transcript_id "te_tx_243.1"; gene_id "te_tx_243";
chr1	transcript	165720366	165724568	-	transcript_id "te_tx_244.1"; gene_id "te_tx_244";
chr1	exon	165720366	165724018	-	transcript_id "te_tx_244.1"; gene_id "te_tx_244";
chr1	exon	165724391	165724568	-	transcript_id "te_tx_244.1"; gene_id "te_tx_244";
chr1	transcript	165720366	165724821	-	transcript_id "te_tx_244.2"; gene_id "te_tx_244";
chr1	exon	165720366	165724018	-	transcript_id "te_tx_244.2"; gene_id "te_tx_244";
chr1	exon	165724391	165724542	-	transcript_id "te_tx_244.2"; gene_id "te_tx_244";
chr1	exon	165724640	165724821	-	transcript_id "te_tx_244.2"; gene_id "te_tx_244";
chr1	transcript	165723762	165724730	+	transcript_id "te_tx_245.1"; gene_id "te_tx_245";
chr1	exon	165723762	165723814	+	transcript_id "te_tx_245.1"; gene_id "te_tx_245";
chr1	exon	165724363	165724730	+	transcript_id "te_tx_245.1"; gene_id "te_tx_245";
chr1	transcript	166047685	166049436	-	transcript_id "te_tx_246.1"; gene_id "te_tx_246";
chr1	exon	166047685	166048881	-	transcript_id "te_tx_246.1"; gene_id "te_tx_246";
chr1	exon	166048994	166049436	-	transcript_id "te_tx_246.1"; gene_id "te_tx_246";
chr1	transcript	166047685	166048916	-	transcript_id "te_tx_246.2"; gene_id "te_tx_246";
chr1	exon	166047685	166048546	-	transcript_id "te_tx_246.2"; gene_id "te_tx_246";
chr1	exon	166048678	166048916	-	transcript_id "te_tx_246.2"; gene_id "te_tx_246";
chr1	transcript	166047685	166049436	-	transcript_id "te_tx_246.3"; gene_id "te_tx_246";
chr1	exon	166047685	166048546	-	transcript_id "te_tx_246.3"; gene_id "te_tx_246";
chr1	exon	166048678	166048881	-	transcript_id "te_tx_246.3"; gene_id "te_tx_246";
chr1	exon	166048990	166049436	-	transcript_id "te_tx_246.3"; gene_id "te_tx_246";
chr1	transcript	166047685	166049436	-	transcript_id "te_tx_246.4"; gene_id "te_tx_246";
chr1	exon	166047685	166048881	-	transcript_id "te_tx_246.4"; gene_id "te_tx_246";
chr1	exon	166048990	166049436	-	transcript_id "te_tx_246.4"; gene_id "te_tx_246";
chr1	transcript	166049302	166050975	+	transcript_id "te_tx_247.1"; gene_id "te_tx_247";
chr1	exon	166049302	166049436	+	transcript_id "te_tx_247.1"; gene_id "te_tx_247";
chr1	exon	166049711	166049789	+	transcript_id "te_tx_247.1"; gene_id "te_tx_247";
chr1	exon	166050750	166050975	+	transcript_id "te_tx_247.1"; gene_id "te_tx_247";
chr1	transcript	166049302	166053224	+	transcript_id "te_tx_247.2"; gene_id "te_tx_247";
chr1	exon	166049302	166049436	+	transcript_id "te_tx_247.2"; gene_id "te_tx_247";
chr1	exon	166049711	166049829	+	transcript_id "te_tx_247.2"; gene_id "te_tx_247";
chr1	exon	166053185	166053224	+	transcript_id "te_tx_247.2"; gene_id "te_tx_247";
chr1	transcript	168405528	168405847	-	transcript_id "te_tx_248.1"; gene_id "te_tx_248";
chr1	exon	168405528	168405847	-	transcript_id "te_tx_248.1"; gene_id "te_tx_248";
chr1	transcript	169257198	169259200	+	transcript_id "te_tx_249.1"; gene_id "te_tx_249";
chr1	exon	169257198	169257329	+	transcript_id "te_tx_249.1"; gene_id "te_tx_249";
chr1	exon	169257981	169259200	+	transcript_id "te_tx_249.1"; gene_id "te_tx_249";
chr1	transcript	169543474	169543843	+	transcript_id "te_tx_250.1"; gene_id "te_tx_250";
chr1	exon	169543474	169543570	+	transcript_id "te_tx_250.1"; gene_id "te_tx_250";
chr1	exon	169543601	169543843	+	transcript_id "te_tx_250.1"; gene_id "te_tx_250";
chr1	transcript	170229970	170232153	+	transcript_id "te_tx_251.1"; gene_id "te_tx_251";
chr1	exon	170229970	170230803	+	transcript_id "te_tx_251.1"; gene_id "te_tx_251";
chr1	exon	170230882	170231155	+	transcript_id "te_tx_251.1"; gene_id "te_tx_251";
chr1	exon	170231195	170232153	+	transcript_id "te_tx_251.1"; gene_id "te_tx_251";
chr1	transcript	170630723	170631467	+	transcript_id "te_tx_252.1"; gene_id "te_tx_252";
chr1	exon	170630723	170631049	+	transcript_id "te_tx_252.1"; gene_id "te_tx_252";
chr1	exon	170631164	170631467	+	transcript_id "te_tx_252.1"; gene_id "te_tx_252";
chr1	transcript	170977570	170986466	+	transcript_id "te_tx_253.1"; gene_id "te_tx_253";
chr1	exon	170977570	170978904	+	transcript_id "te_tx_253.1"; gene_id "te_tx_253";
chr1	exon	170983734	170983962	+	transcript_id "te_tx_253.1"; gene_id "te_tx_253";
chr1	exon	170985651	170986466	+	transcript_id "te_tx_253.1"; gene_id "te_tx_253";
chr1	transcript	170979798	170986466	+	transcript_id "te_tx_253.2"; gene_id "te_tx_253";
chr1	exon	170979798	170979884	+	transcript_id "te_tx_253.2"; gene_id "te_tx_253";
chr1	exon	170983734	170983962	+	transcript_id "te_tx_253.2"; gene_id "te_tx_253";
chr1	exon	170985651	170986466	+	transcript_id "te_tx_253.2"; gene_id "te_tx_253";
chr1	transcript	171305072	171327899	-	transcript_id "te_tx_254.1"; gene_id "te_tx_254";
chr1	exon	171305072	171305562	-	transcript_id "te_tx_254.1"; gene_id "te_tx_254";
chr1	exon	171327469	171327899	-	transcript_id "te_tx_254.1"; gene_id "te_tx_254";
chr1	transcript	171305072	171305732	-	transcript_id "te_tx_254.2"; gene_id "te_tx_254";
chr1	exon	171305072	171305732	-	transcript_id "te_tx_254.2"; gene_id "te_tx_254";
chr1	transcript	171312411	171314806	+	transcript_id "te_tx_255.1"; gene_id "te_tx_255";
chr1	exon	171312411	171312992	+	transcript_id "te_tx_255.1"; gene_id "te_tx_255";
chr1	exon	171313844	171314806	+	transcript_id "te_tx_255.1"; gene_id "te_tx_255";
chr1	transcript	171423720	171437356	-	transcript_id "te_tx_256.1"; gene_id "te_tx_256";
chr1	exon	171423720	171424061	-	transcript_id "te_tx_256.1"; gene_id "te_tx_256";
chr1	exon	171437242	171437356	-	transcript_id "te_tx_256.1"; gene_id "te_tx_256";
chr1	transcript	171423720	171424108	-	transcript_id "te_tx_256.2"; gene_id "te_tx_256";
chr1	exon	171423720	171424108	-	transcript_id "te_tx_256.2"; gene_id "te_tx_256";
chr1	transcript	172206932	172209746	+	transcript_id "te_tx_257.1"; gene_id "te_tx_257";
chr1	exon	172206932	172209254	+	transcript_id "te_tx_257.1"; gene_id "te_tx_257";
chr1	exon	172209630	172209746	+	transcript_id "te_tx_257.1"; gene_id "te_tx_257";
chr1	transcript	172206932	172209746	+	transcript_id "te_tx_257.2"; gene_id "te_tx_257";
chr1	exon	172206932	172207702	+	transcript_id "te_tx_257.2"; gene_id "te_tx_257";
chr1	exon	172208917	172208956	+	transcript_id "te_tx_257.2"; gene_id "te_tx_257";
chr1	exon	172209149	172209254	+	transcript_id "te_tx_257.2"; gene_id "te_tx_257";
chr1	exon	172209630	172209746	+	transcript_id "te_tx_257.2"; gene_id "te_tx_257";
chr1	transcript	172388327	172390971	-	transcript_id "te_tx_258.1"; gene_id "te_tx_258";
chr1	exon	172388327	172389519	-	transcript_id "te_tx_258.1"; gene_id "te_tx_258";
chr1	exon	172390877	172390971	-	transcript_id "te_tx_258.1"; gene_id "te_tx_258";
chr1	transcript	172995976	172997793	+	transcript_id "te_tx_259.1"; gene_id "te_tx_259";
chr1	exon	172995976	172996108	+	transcript_id "te_tx_259.1"; gene_id "te_tx_259";
chr1	exon	172997169	172997793	+	transcript_id "te_tx_259.1"; gene_id "te_tx_259";
chr1	transcript	173260356	173261086	+	transcript_id "te_tx_260.1"; gene_id "te_tx_260";
chr1	exon	173260356	173260540	+	transcript_id "te_tx_260.1"; gene_id "te_tx_260";
chr1	exon	173260957	173261086	+	transcript_id "te_tx_260.1"; gene_id "te_tx_260";
chr1	transcript	173821991	173822323	+	transcript_id "te_tx_261.1"; gene_id "te_tx_261";
chr1	exon	173821991	173822323	+	transcript_id "te_tx_261.1"; gene_id "te_tx_261";
chr1	transcript	174383137	174383724	-	transcript_id "te_tx_262.1"; gene_id "te_tx_262";
chr1	exon	174383137	174383518	-	transcript_id "te_tx_262.1"; gene_id "te_tx_262";
chr1	exon	174383585	174383724	-	transcript_id "te_tx_262.1"; gene_id "te_tx_262";
chr1	transcript	177701794	177705425	-	transcript_id "te_tx_263.1"; gene_id "te_tx_263";
chr1	exon	177701794	177701881	-	transcript_id "te_tx_263.1"; gene_id "te_tx_263";
chr1	exon	177705242	177705425	-	transcript_id "te_tx_263.1"; gene_id "te_tx_263";
chr1	transcript	177983260	177988992	+	transcript_id "te_tx_264.1"; gene_id "te_tx_264";
chr1	exon	177983260	177988992	+	transcript_id "te_tx_264.1"; gene_id "te_tx_264";
chr1	transcript	178058267	178061179	+	transcript_id "te_tx_265.1"; gene_id "te_tx_265";
chr1	exon	178058267	178059196	+	transcript_id "te_tx_265.1"; gene_id "te_tx_265";
chr1	exon	178059236	178061179	+	transcript_id "te_tx_265.1"; gene_id "te_tx_265";
chr1	transcript	178062697	178065039	+	transcript_id "te_tx_266.1"; gene_id "te_tx_266";
chr1	exon	178062697	178065039	+	transcript_id "te_tx_266.1"; gene_id "te_tx_266";
chr1	transcript	178062697	178180184	+	transcript_id "te_tx_266.2"; gene_id "te_tx_266";
chr1	exon	178062697	178063996	+	transcript_id "te_tx_266.2"; gene_id "te_tx_266";
chr1	exon	178179927	178180184	+	transcript_id "te_tx_266.2"; gene_id "te_tx_266";
chr1	transcript	178313930	178318649	-	transcript_id "te_tx_267.1"; gene_id "te_tx_267";
chr1	exon	178313930	178315448	-	transcript_id "te_tx_267.1"; gene_id "te_tx_267";
chr1	exon	178318111	178318649	-	transcript_id "te_tx_267.1"; gene_id "te_tx_267";
chr1	transcript	178589308	178590958	-	transcript_id "te_tx_268.1"; gene_id "te_tx_268";
chr1	exon	178589308	178589945	-	transcript_id "te_tx_268.1"; gene_id "te_tx_268";
chr1	exon	178590332	178590958	-	transcript_id "te_tx_268.1"; gene_id "te_tx_268";
chr1	transcript	178809514	178810455	-	transcript_id "te_tx_269.1"; gene_id "te_tx_269";
chr1	exon	178809514	178809887	-	transcript_id "te_tx_269.1"; gene_id "te_tx_269";
chr1	exon	178810224	178810455	-	transcript_id "te_tx_269.1"; gene_id "te_tx_269";
chr1	transcript	179694071	179715114	-	transcript_id "te_tx_270.1"; gene_id "te_tx_270";
chr1	exon	179694071	179695814	-	transcript_id "te_tx_270.1"; gene_id "te_tx_270";
chr1	exon	179697777	179697952	-	transcript_id "te_tx_270.1"; gene_id "te_tx_270";
chr1	exon	179699294	179699460	-	transcript_id "te_tx_270.1"; gene_id "te_tx_270";
chr1	exon	179700237	179700371	-	transcript_id "te_tx_270.1"; gene_id "te_tx_270";
chr1	exon	179702382	179702656	-	transcript_id "te_tx_270.1"; gene_id "te_tx_270";
chr1	exon	179705110	179705217	-	transcript_id "te_tx_270.1"; gene_id "te_tx_270";
chr1	exon	179705749	179705867	-	transcript_id "te_tx_270.1"; gene_id "te_tx_270";
chr1	exon	179708397	179708541	-	transcript_id "te_tx_270.1"; gene_id "te_tx_270";
chr1	exon	179709351	179709474	-	transcript_id "te_tx_270.1"; gene_id "te_tx_270";
chr1	exon	179711291	179711345	-	transcript_id "te_tx_270.1"; gene_id "te_tx_270";
chr1	exon	179712452	179712542	-	transcript_id "te_tx_270.1"; gene_id "te_tx_270";
chr1	exon	179712828	179712940	-	transcript_id "te_tx_270.1"; gene_id "te_tx_270";
chr1	exon	179713873	179713979	-	transcript_id "te_tx_270.1"; gene_id "te_tx_270";
chr1	exon	179715056	179715114	-	transcript_id "te_tx_270.1"; gene_id "te_tx_270";
chr1	transcript	179705520	179708542	-	transcript_id "te_tx_270.4"; gene_id "te_tx_270";
chr1	exon	179705520	179705867	-	transcript_id "te_tx_270.4"; gene_id "te_tx_270";
chr1	exon	179708397	179708542	-	transcript_id "te_tx_270.4"; gene_id "te_tx_270";
chr1	transcript	179694071	179708542	-	transcript_id "te_tx_270.2"; gene_id "te_tx_270";
chr1	exon	179694071	179695814	-	transcript_id "te_tx_270.2"; gene_id "te_tx_270";
chr1	exon	179697777	179697952	-	transcript_id "te_tx_270.2"; gene_id "te_tx_270";
chr1	exon	179699294	179699460	-	transcript_id "te_tx_270.2"; gene_id "te_tx_270";
chr1	exon	179700237	179700371	-	transcript_id "te_tx_270.2"; gene_id "te_tx_270";
chr1	exon	179702382	179702656	-	transcript_id "te_tx_270.2"; gene_id "te_tx_270";
chr1	exon	179705110	179705217	-	transcript_id "te_tx_270.2"; gene_id "te_tx_270";
chr1	exon	179705749	179705867	-	transcript_id "te_tx_270.2"; gene_id "te_tx_270";
chr1	exon	179708397	179708542	-	transcript_id "te_tx_270.2"; gene_id "te_tx_270";
chr1	transcript	179702381	179708542	-	transcript_id "te_tx_270.3"; gene_id "te_tx_270";
chr1	exon	179702381	179702656	-	transcript_id "te_tx_270.3"; gene_id "te_tx_270";
chr1	exon	179705110	179705217	-	transcript_id "te_tx_270.3"; gene_id "te_tx_270";
chr1	exon	179705749	179705867	-	transcript_id "te_tx_270.3"; gene_id "te_tx_270";
chr1	exon	179708397	179708542	-	transcript_id "te_tx_270.3"; gene_id "te_tx_270";
chr1	transcript	180637765	180640860	+	transcript_id "te_tx_271.1"; gene_id "te_tx_271";
chr1	exon	180637765	180640860	+	transcript_id "te_tx_271.1"; gene_id "te_tx_271";
chr1	transcript	180762569	180768651	-	transcript_id "te_tx_272.1"; gene_id "te_tx_272";
chr1	exon	180762569	180763920	-	transcript_id "te_tx_272.1"; gene_id "te_tx_272";
chr1	exon	180768481	180768651	-	transcript_id "te_tx_272.1"; gene_id "te_tx_272";
chr1	transcript	180877374	180885586	-	transcript_id "te_tx_273.1"; gene_id "te_tx_273";
chr1	exon	180877374	180879062	-	transcript_id "te_tx_273.1"; gene_id "te_tx_273";
chr1	exon	180882512	180882600	-	transcript_id "te_tx_273.1"; gene_id "te_tx_273";
chr1	exon	180885424	180885586	-	transcript_id "te_tx_273.1"; gene_id "te_tx_273";
chr1	transcript	180877374	180885586	-	transcript_id "te_tx_273.2"; gene_id "te_tx_273";
chr1	exon	180877374	180879062	-	transcript_id "te_tx_273.2"; gene_id "te_tx_273";
chr1	exon	180885424	180885586	-	transcript_id "te_tx_273.2"; gene_id "te_tx_273";
chr1	transcript	180877374	180885586	-	transcript_id "te_tx_273.3"; gene_id "te_tx_273";
chr1	exon	180877374	180879062	-	transcript_id "te_tx_273.3"; gene_id "te_tx_273";
chr1	exon	180879285	180882600	-	transcript_id "te_tx_273.3"; gene_id "te_tx_273";
chr1	exon	180885424	180885586	-	transcript_id "te_tx_273.3"; gene_id "te_tx_273";
chr1	transcript	180920835	180924758	-	transcript_id "te_tx_274.1"; gene_id "te_tx_274";
chr1	exon	180920835	180921090	-	transcript_id "te_tx_274.1"; gene_id "te_tx_274";
chr1	exon	180924058	180924758	-	transcript_id "te_tx_274.1"; gene_id "te_tx_274";
chr1	transcript	180920835	180928288	-	transcript_id "te_tx_274.2"; gene_id "te_tx_274";
chr1	exon	180920835	180921090	-	transcript_id "te_tx_274.2"; gene_id "te_tx_274";
chr1	exon	180922929	180923085	-	transcript_id "te_tx_274.2"; gene_id "te_tx_274";
chr1	exon	180927988	180928288	-	transcript_id "te_tx_274.2"; gene_id "te_tx_274";
chr1	transcript	181144242	181147114	+	transcript_id "te_tx_275.1"; gene_id "te_tx_275";
chr1	exon	181144242	181144901	+	transcript_id "te_tx_275.1"; gene_id "te_tx_275";
chr1	exon	181146141	181147114	+	transcript_id "te_tx_275.1"; gene_id "te_tx_275";
chr1	transcript	181293700	181295884	+	transcript_id "te_tx_276.1"; gene_id "te_tx_276";
chr1	exon	181293700	181293819	+	transcript_id "te_tx_276.1"; gene_id "te_tx_276";
chr1	exon	181295774	181295884	+	transcript_id "te_tx_276.1"; gene_id "te_tx_276";
chr1	transcript	181617116	181627209	-	transcript_id "te_tx_277.1"; gene_id "te_tx_277";
chr1	exon	181617116	181621879	-	transcript_id "te_tx_277.1"; gene_id "te_tx_277";
chr1	exon	181626618	181626740	-	transcript_id "te_tx_277.1"; gene_id "te_tx_277";
chr1	exon	181627126	181627209	-	transcript_id "te_tx_277.1"; gene_id "te_tx_277";
chr1	transcript	181776614	181778218	-	transcript_id "te_tx_278.1"; gene_id "te_tx_278";
chr1	exon	181776614	181776671	-	transcript_id "te_tx_278.1"; gene_id "te_tx_278";
chr1	exon	181778063	181778218	-	transcript_id "te_tx_278.1"; gene_id "te_tx_278";
chr1	transcript	181840410	181842051	+	transcript_id "te_tx_279.1"; gene_id "te_tx_279";
chr1	exon	181840410	181841874	+	transcript_id "te_tx_279.1"; gene_id "te_tx_279";
chr1	exon	181842026	181842051	+	transcript_id "te_tx_279.1"; gene_id "te_tx_279";
chr1	transcript	181881161	181886744	+	transcript_id "te_tx_280.1"; gene_id "te_tx_280";
chr1	exon	181881161	181881294	+	transcript_id "te_tx_280.1"; gene_id "te_tx_280";
chr1	exon	181885966	181886744	+	transcript_id "te_tx_280.1"; gene_id "te_tx_280";
chr1	transcript	182020444	182024341	-	transcript_id "te_tx_281.1"; gene_id "te_tx_281";
chr1	exon	182020444	182020541	-	transcript_id "te_tx_281.1"; gene_id "te_tx_281";
chr1	exon	182024224	182024341	-	transcript_id "te_tx_281.1"; gene_id "te_tx_281";
chr1	transcript	182024666	182031323	-	transcript_id "te_tx_282.1"; gene_id "te_tx_282";
chr1	exon	182024666	182028891	-	transcript_id "te_tx_282.1"; gene_id "te_tx_282";
chr1	exon	182031043	182031323	-	transcript_id "te_tx_282.1"; gene_id "te_tx_282";
chr1	transcript	182679931	182681887	+	transcript_id "te_tx_283.1"; gene_id "te_tx_283";
chr1	exon	182679931	182680170	+	transcript_id "te_tx_283.1"; gene_id "te_tx_283";
chr1	exon	182681150	182681887	+	transcript_id "te_tx_283.1"; gene_id "te_tx_283";
chr1	transcript	183773028	183802559	+	transcript_id "te_tx_284.1"; gene_id "te_tx_284";
chr1	exon	183773028	183773271	+	transcript_id "te_tx_284.1"; gene_id "te_tx_284";
chr1	exon	183782137	183782274	+	transcript_id "te_tx_284.1"; gene_id "te_tx_284";
chr1	exon	183802487	183802559	+	transcript_id "te_tx_284.1"; gene_id "te_tx_284";
chr1	transcript	184428960	184432177	+	transcript_id "te_tx_285.1"; gene_id "te_tx_285";
chr1	exon	184428960	184429074	+	transcript_id "te_tx_285.1"; gene_id "te_tx_285";
chr1	exon	184431690	184432177	+	transcript_id "te_tx_285.1"; gene_id "te_tx_285";
chr1	transcript	184665173	184666362	-	transcript_id "te_tx_286.1"; gene_id "te_tx_286";
chr1	exon	184665173	184665570	-	transcript_id "te_tx_286.1"; gene_id "te_tx_286";
chr1	exon	184666026	184666362	-	transcript_id "te_tx_286.1"; gene_id "te_tx_286";
chr1	transcript	184722388	184723768	-	transcript_id "te_tx_287.1"; gene_id "te_tx_287";
chr1	exon	184722388	184722452	-	transcript_id "te_tx_287.1"; gene_id "te_tx_287";
chr1	exon	184723414	184723768	-	transcript_id "te_tx_287.1"; gene_id "te_tx_287";
chr1	transcript	184782425	184785662	+	transcript_id "te_tx_288.1"; gene_id "te_tx_288";
chr1	exon	184782425	184782797	+	transcript_id "te_tx_288.1"; gene_id "te_tx_288";
chr1	exon	184783954	184785662	+	transcript_id "te_tx_288.1"; gene_id "te_tx_288";
chr1	transcript	184783953	184785662	+	transcript_id "te_tx_288.2"; gene_id "te_tx_288";
chr1	exon	184783953	184785662	+	transcript_id "te_tx_288.2"; gene_id "te_tx_288";
chr1	transcript	184848911	184855181	+	transcript_id "te_tx_289.1"; gene_id "te_tx_289";
chr1	exon	184848911	184849034	+	transcript_id "te_tx_289.1"; gene_id "te_tx_289";
chr1	exon	184852048	184855181	+	transcript_id "te_tx_289.1"; gene_id "te_tx_289";
chr1	transcript	185390031	185392695	-	transcript_id "te_tx_290.1"; gene_id "te_tx_290";
chr1	exon	185390031	185390720	-	transcript_id "te_tx_290.1"; gene_id "te_tx_290";
chr1	exon	185390992	185392695	-	transcript_id "te_tx_290.1"; gene_id "te_tx_290";
chr1	transcript	185448453	185449942	-	transcript_id "te_tx_291.1"; gene_id "te_tx_291";
chr1	exon	185448453	185449214	-	transcript_id "te_tx_291.1"; gene_id "te_tx_291";
chr1	exon	185449831	185449942	-	transcript_id "te_tx_291.1"; gene_id "te_tx_291";
chr1	transcript	185500266	185502904	+	transcript_id "te_tx_292.1"; gene_id "te_tx_292";
chr1	exon	185500266	185500406	+	transcript_id "te_tx_292.1"; gene_id "te_tx_292";
chr1	exon	185501627	185502904	+	transcript_id "te_tx_292.1"; gene_id "te_tx_292";
chr1	transcript	185538522	185541340	-	transcript_id "te_tx_293.1"; gene_id "te_tx_293";
chr1	exon	185538522	185538819	-	transcript_id "te_tx_293.1"; gene_id "te_tx_293";
chr1	exon	185541098	185541340	-	transcript_id "te_tx_293.1"; gene_id "te_tx_293";
chr1	transcript	186028967	186034182	-	transcript_id "te_tx_294.1"; gene_id "te_tx_294";
chr1	exon	186028967	186031788	-	transcript_id "te_tx_294.1"; gene_id "te_tx_294";
chr1	exon	186033919	186034182	-	transcript_id "te_tx_294.1"; gene_id "te_tx_294";
chr1	transcript	186049489	186051036	-	transcript_id "te_tx_295.1"; gene_id "te_tx_295";
chr1	exon	186049489	186049827	-	transcript_id "te_tx_295.1"; gene_id "te_tx_295";
chr1	exon	186051014	186051036	-	transcript_id "te_tx_295.1"; gene_id "te_tx_295";
chr1	transcript	186587237	186599915	+	transcript_id "te_tx_296.1"; gene_id "te_tx_296";
chr1	exon	186587237	186587420	+	transcript_id "te_tx_296.1"; gene_id "te_tx_296";
chr1	exon	186588998	186589587	+	transcript_id "te_tx_296.1"; gene_id "te_tx_296";
chr1	exon	186589805	186589958	+	transcript_id "te_tx_296.1"; gene_id "te_tx_296";
chr1	exon	186599453	186599915	+	transcript_id "te_tx_296.1"; gene_id "te_tx_296";
chr1	transcript	186587237	186614877	+	transcript_id "te_tx_296.2"; gene_id "te_tx_296";
chr1	exon	186587237	186587420	+	transcript_id "te_tx_296.2"; gene_id "te_tx_296";
chr1	exon	186588998	186589587	+	transcript_id "te_tx_296.2"; gene_id "te_tx_296";
chr1	exon	186589805	186589958	+	transcript_id "te_tx_296.2"; gene_id "te_tx_296";
chr1	exon	186613573	186614877	+	transcript_id "te_tx_296.2"; gene_id "te_tx_296";
chr1	transcript	186749393	186752836	+	transcript_id "te_tx_297.1"; gene_id "te_tx_297";
chr1	exon	186749393	186749633	+	transcript_id "te_tx_297.1"; gene_id "te_tx_297";
chr1	exon	186752417	186752836	+	transcript_id "te_tx_297.1"; gene_id "te_tx_297";
chr1	transcript	186749393	186752836	+	transcript_id "te_tx_297.2"; gene_id "te_tx_297";
chr1	exon	186749393	186750165	+	transcript_id "te_tx_297.2"; gene_id "te_tx_297";
chr1	exon	186752417	186752836	+	transcript_id "te_tx_297.2"; gene_id "te_tx_297";
chr1	transcript	186749393	186752836	+	transcript_id "te_tx_297.3"; gene_id "te_tx_297";
chr1	exon	186749393	186749659	+	transcript_id "te_tx_297.3"; gene_id "te_tx_297";
chr1	exon	186752417	186752836	+	transcript_id "te_tx_297.3"; gene_id "te_tx_297";
chr1	transcript	187037436	187037999	-	transcript_id "te_tx_298.1"; gene_id "te_tx_298";
chr1	exon	187037436	187037620	-	transcript_id "te_tx_298.1"; gene_id "te_tx_298";
chr1	exon	187037911	187037999	-	transcript_id "te_tx_298.1"; gene_id "te_tx_298";
chr1	transcript	187037640	187037999	-	transcript_id "te_tx_298.2"; gene_id "te_tx_298";
chr1	exon	187037640	187037823	-	transcript_id "te_tx_298.2"; gene_id "te_tx_298";
chr1	exon	187037911	187037999	-	transcript_id "te_tx_298.2"; gene_id "te_tx_298";
chr1	transcript	189494686	189500281	-	transcript_id "te_tx_299.1"; gene_id "te_tx_299";
chr1	exon	189494686	189494799	-	transcript_id "te_tx_299.1"; gene_id "te_tx_299";
chr1	exon	189495247	189495309	-	transcript_id "te_tx_299.1"; gene_id "te_tx_299";
chr1	exon	189500159	189500281	-	transcript_id "te_tx_299.1"; gene_id "te_tx_299";
chr1	transcript	190007793	190009015	-	transcript_id "te_tx_300.1"; gene_id "te_tx_300";
chr1	exon	190007793	190008242	-	transcript_id "te_tx_300.1"; gene_id "te_tx_300";
chr1	exon	190008936	190009015	-	transcript_id "te_tx_300.1"; gene_id "te_tx_300";
chr1	transcript	190009099	190067206	-	transcript_id "te_tx_301.1"; gene_id "te_tx_301";
chr1	exon	190009099	190009505	-	transcript_id "te_tx_301.1"; gene_id "te_tx_301";
chr1	exon	190012691	190012826	-	transcript_id "te_tx_301.1"; gene_id "te_tx_301";
chr1	exon	190067086	190067206	-	transcript_id "te_tx_301.1"; gene_id "te_tx_301";
chr1	transcript	190012205	190067206	-	transcript_id "te_tx_301.2"; gene_id "te_tx_301";
chr1	exon	190012205	190012447	-	transcript_id "te_tx_301.2"; gene_id "te_tx_301";
chr1	exon	190012691	190012826	-	transcript_id "te_tx_301.2"; gene_id "te_tx_301";
chr1	exon	190067086	190067206	-	transcript_id "te_tx_301.2"; gene_id "te_tx_301";
chr1	transcript	190416438	190419824	+	transcript_id "te_tx_302.1"; gene_id "te_tx_302";
chr1	exon	190416438	190416466	+	transcript_id "te_tx_302.1"; gene_id "te_tx_302";
chr1	exon	190419640	190419824	+	transcript_id "te_tx_302.1"; gene_id "te_tx_302";
chr1	transcript	190955414	190957262	+	transcript_id "te_tx_303.1"; gene_id "te_tx_303";
chr1	exon	190955414	190957112	+	transcript_id "te_tx_303.1"; gene_id "te_tx_303";
chr1	exon	190957147	190957262	+	transcript_id "te_tx_303.1"; gene_id "te_tx_303";
chr1	transcript	191430657	191432682	-	transcript_id "te_tx_304.1"; gene_id "te_tx_304";
chr1	exon	191430657	191431616	-	transcript_id "te_tx_304.1"; gene_id "te_tx_304";
chr1	exon	191432058	191432148	-	transcript_id "te_tx_304.1"; gene_id "te_tx_304";
chr1	exon	191432299	191432682	-	transcript_id "te_tx_304.1"; gene_id "te_tx_304";
chr1	transcript	191431752	191432682	-	transcript_id "te_tx_304.2"; gene_id "te_tx_304";
chr1	exon	191431752	191432148	-	transcript_id "te_tx_304.2"; gene_id "te_tx_304";
chr1	exon	191432299	191432682	-	transcript_id "te_tx_304.2"; gene_id "te_tx_304";
chr1	transcript	191436433	191454756	-	transcript_id "te_tx_305.1"; gene_id "te_tx_305";
chr1	exon	191436433	191437980	-	transcript_id "te_tx_305.1"; gene_id "te_tx_305";
chr1	exon	191441651	191441807	-	transcript_id "te_tx_305.1"; gene_id "te_tx_305";
chr1	exon	191442512	191442773	-	transcript_id "te_tx_305.1"; gene_id "te_tx_305";
chr1	exon	191454047	191454217	-	transcript_id "te_tx_305.1"; gene_id "te_tx_305";
chr1	exon	191454599	191454756	-	transcript_id "te_tx_305.1"; gene_id "te_tx_305";
chr1	transcript	191454046	191465428	-	transcript_id "te_tx_305.2"; gene_id "te_tx_305";
chr1	exon	191454046	191454217	-	transcript_id "te_tx_305.2"; gene_id "te_tx_305";
chr1	exon	191464303	191464381	-	transcript_id "te_tx_305.2"; gene_id "te_tx_305";
chr1	exon	191464824	191465428	-	transcript_id "te_tx_305.2"; gene_id "te_tx_305";
chr1	transcript	191454046	191454756	-	transcript_id "te_tx_305.3"; gene_id "te_tx_305";
chr1	exon	191454046	191454217	-	transcript_id "te_tx_305.3"; gene_id "te_tx_305";
chr1	exon	191454599	191454756	-	transcript_id "te_tx_305.3"; gene_id "te_tx_305";
chr1	transcript	191898806	191900917	-	transcript_id "te_tx_306.1"; gene_id "te_tx_306";
chr1	exon	191898806	191898826	-	transcript_id "te_tx_306.1"; gene_id "te_tx_306";
chr1	exon	191900680	191900917	-	transcript_id "te_tx_306.1"; gene_id "te_tx_306";
chr1	transcript	191928434	191942442	+	transcript_id "te_tx_307.1"; gene_id "te_tx_307";
chr1	exon	191928434	191928796	+	transcript_id "te_tx_307.1"; gene_id "te_tx_307";
chr1	exon	191939648	191942442	+	transcript_id "te_tx_307.1"; gene_id "te_tx_307";
chr1	transcript	192854474	192856937	+	transcript_id "te_tx_308.1"; gene_id "te_tx_308";
chr1	exon	192854474	192855078	+	transcript_id "te_tx_308.1"; gene_id "te_tx_308";
chr1	exon	192856015	192856937	+	transcript_id "te_tx_308.1"; gene_id "te_tx_308";
chr1	transcript	193279615	193281155	+	transcript_id "te_tx_309.1"; gene_id "te_tx_309";
chr1	exon	193279615	193280275	+	transcript_id "te_tx_309.1"; gene_id "te_tx_309";
chr1	exon	193280371	193281155	+	transcript_id "te_tx_309.1"; gene_id "te_tx_309";
chr1	transcript	195095322	195096241	+	transcript_id "te_tx_310.1"; gene_id "te_tx_310";
chr1	exon	195095322	195095686	+	transcript_id "te_tx_310.1"; gene_id "te_tx_310";
chr1	exon	195096102	195096241	+	transcript_id "te_tx_310.1"; gene_id "te_tx_310";
chr10	transcript	3212806	3234995	-	transcript_id "te_tx_311.1"; gene_id "te_tx_311";
chr10	exon	3212806	3213020	-	transcript_id "te_tx_311.1"; gene_id "te_tx_311";
chr10	exon	3213355	3213612	-	transcript_id "te_tx_311.1"; gene_id "te_tx_311";
chr10	exon	3214664	3214751	-	transcript_id "te_tx_311.1"; gene_id "te_tx_311";
chr10	exon	3234946	3234995	-	transcript_id "te_tx_311.1"; gene_id "te_tx_311";
chr10	transcript	3337769	3353267	+	transcript_id "te_tx_312.1"; gene_id "te_tx_312";
chr10	exon	3337769	3337848	+	transcript_id "te_tx_312.1"; gene_id "te_tx_312";
chr10	exon	3352254	3352396	+	transcript_id "te_tx_312.1"; gene_id "te_tx_312";
chr10	exon	3353095	3353267	+	transcript_id "te_tx_312.1"; gene_id "te_tx_312";
chr10	transcript	4433320	4433931	-	transcript_id "te_tx_313.1"; gene_id "te_tx_313";
chr10	exon	4433320	4433535	-	transcript_id "te_tx_313.1"; gene_id "te_tx_313";
chr10	exon	4433835	4433931	-	transcript_id "te_tx_313.1"; gene_id "te_tx_313";
chr10	transcript	7234152	7243922	+	transcript_id "te_tx_314.1"; gene_id "te_tx_314";
chr10	exon	7234152	7234240	+	transcript_id "te_tx_314.1"; gene_id "te_tx_314";
chr10	exon	7241555	7243922	+	transcript_id "te_tx_314.1"; gene_id "te_tx_314";
chr10	transcript	7474467	7482597	-	transcript_id "te_tx_315.1"; gene_id "te_tx_315";
chr10	exon	7474467	7477061	-	transcript_id "te_tx_315.1"; gene_id "te_tx_315";
chr10	exon	7482388	7482597	-	transcript_id "te_tx_315.1"; gene_id "te_tx_315";
chr10	transcript	7474467	7481195	-	transcript_id "te_tx_315.2"; gene_id "te_tx_315";
chr10	exon	7474467	7481195	-	transcript_id "te_tx_315.2"; gene_id "te_tx_315";
chr10	transcript	7649773	7651681	+	transcript_id "te_tx_316.1"; gene_id "te_tx_316";
chr10	exon	7649773	7649819	+	transcript_id "te_tx_316.1"; gene_id "te_tx_316";
chr10	exon	7651517	7651681	+	transcript_id "te_tx_316.1"; gene_id "te_tx_316";
chr10	transcript	7789663	7792823	-	transcript_id "te_tx_317.1"; gene_id "te_tx_317";
chr10	exon	7789663	7790456	-	transcript_id "te_tx_317.1"; gene_id "te_tx_317";
chr10	exon	7792508	7792823	-	transcript_id "te_tx_317.1"; gene_id "te_tx_317";
chr10	transcript	8544136	8545465	-	transcript_id "te_tx_318.1"; gene_id "te_tx_318";
chr10	exon	8544136	8545465	-	transcript_id "te_tx_318.1"; gene_id "te_tx_318";
chr10	transcript	8544136	8547063	-	transcript_id "te_tx_318.2"; gene_id "te_tx_318";
chr10	exon	8544136	8545269	-	transcript_id "te_tx_318.2"; gene_id "te_tx_318";
chr10	exon	8546440	8547063	-	transcript_id "te_tx_318.2"; gene_id "te_tx_318";
chr10	transcript	8838596	8842298	+	transcript_id "te_tx_319.1"; gene_id "te_tx_319";
chr10	exon	8838596	8838704	+	transcript_id "te_tx_319.1"; gene_id "te_tx_319";
chr10	exon	8841933	8842298	+	transcript_id "te_tx_319.1"; gene_id "te_tx_319";
chr10	transcript	11128798	11130785	+	transcript_id "te_tx_320.1"; gene_id "te_tx_320";
chr10	exon	11128798	11128879	+	transcript_id "te_tx_320.1"; gene_id "te_tx_320";
chr10	exon	11130525	11130785	+	transcript_id "te_tx_320.1"; gene_id "te_tx_320";
chr10	transcript	11128798	11146571	+	transcript_id "te_tx_320.2"; gene_id "te_tx_320";
chr10	exon	11128798	11128879	+	transcript_id "te_tx_320.2"; gene_id "te_tx_320";
chr10	exon	11130525	11130618	+	transcript_id "te_tx_320.2"; gene_id "te_tx_320";
chr10	exon	11131340	11131431	+	transcript_id "te_tx_320.2"; gene_id "te_tx_320";
chr10	exon	11144774	11146571	+	transcript_id "te_tx_320.2"; gene_id "te_tx_320";
chr10	transcript	12845902	12846559	-	transcript_id "te_tx_321.1"; gene_id "te_tx_321";
chr10	exon	12845902	12846559	-	transcript_id "te_tx_321.1"; gene_id "te_tx_321";
chr10	transcript	12916643	12923116	-	transcript_id "te_tx_322.1"; gene_id "te_tx_322";
chr10	exon	12916643	12917071	-	transcript_id "te_tx_322.1"; gene_id "te_tx_322";
chr10	exon	12921609	12921717	-	transcript_id "te_tx_322.1"; gene_id "te_tx_322";
chr10	exon	12922574	12923116	-	transcript_id "te_tx_322.1"; gene_id "te_tx_322";
chr10	transcript	12921608	12921718	-	transcript_id "te_tx_322.2"; gene_id "te_tx_322";
chr10	exon	12921608	12921718	-	transcript_id "te_tx_322.2"; gene_id "te_tx_322";
chr10	transcript	13060729	13084674	+	transcript_id "te_tx_323.1"; gene_id "te_tx_323";
chr10	exon	13060729	13060859	+	transcript_id "te_tx_323.1"; gene_id "te_tx_323";
chr10	exon	13081476	13081522	+	transcript_id "te_tx_323.1"; gene_id "te_tx_323";
chr10	exon	13084638	13084674	+	transcript_id "te_tx_323.1"; gene_id "te_tx_323";
chr10	transcript	15208292	15211485	-	transcript_id "te_tx_324.1"; gene_id "te_tx_324";
chr10	exon	15208292	15209981	-	transcript_id "te_tx_324.1"; gene_id "te_tx_324";
chr10	exon	15211351	15211485	-	transcript_id "te_tx_324.1"; gene_id "te_tx_324";
chr10	transcript	15791652	15807074	+	transcript_id "te_tx_325.1"; gene_id "te_tx_325";
chr10	exon	15791652	15792043	+	transcript_id "te_tx_325.1"; gene_id "te_tx_325";
chr10	exon	15801416	15801592	+	transcript_id "te_tx_325.1"; gene_id "te_tx_325";
chr10	exon	15806871	15807074	+	transcript_id "te_tx_325.1"; gene_id "te_tx_325";
chr10	transcript	15791652	15819637	+	transcript_id "te_tx_325.2"; gene_id "te_tx_325";
chr10	exon	15791652	15792032	+	transcript_id "te_tx_325.2"; gene_id "te_tx_325";
chr10	exon	15801416	15801592	+	transcript_id "te_tx_325.2"; gene_id "te_tx_325";
chr10	exon	15819522	15819637	+	transcript_id "te_tx_325.2"; gene_id "te_tx_325";
chr10	transcript	15791652	15806652	+	transcript_id "te_tx_325.3"; gene_id "te_tx_325";
chr10	exon	15791652	15792032	+	transcript_id "te_tx_325.3"; gene_id "te_tx_325";
chr10	exon	15801416	15801592	+	transcript_id "te_tx_325.3"; gene_id "te_tx_325";
chr10	exon	15806341	15806652	+	transcript_id "te_tx_325.3"; gene_id "te_tx_325";
chr10	transcript	17317142	17322049	-	transcript_id "te_tx_326.1"; gene_id "te_tx_326";
chr10	exon	17317142	17318857	-	transcript_id "te_tx_326.1"; gene_id "te_tx_326";
chr10	exon	17319429	17320441	-	transcript_id "te_tx_326.1"; gene_id "te_tx_326";
chr10	exon	17320835	17322049	-	transcript_id "te_tx_326.1"; gene_id "te_tx_326";
chr10	transcript	17317142	17322049	-	transcript_id "te_tx_326.2"; gene_id "te_tx_326";
chr10	exon	17317142	17320908	-	transcript_id "te_tx_326.2"; gene_id "te_tx_326";
chr10	exon	17320990	17322049	-	transcript_id "te_tx_326.2"; gene_id "te_tx_326";
chr10	transcript	17317142	17324615	-	transcript_id "te_tx_326.3"; gene_id "te_tx_326";
chr10	exon	17317142	17318857	-	transcript_id "te_tx_326.3"; gene_id "te_tx_326";
chr10	exon	17319429	17320908	-	transcript_id "te_tx_326.3"; gene_id "te_tx_326";
chr10	exon	17320990	17321255	-	transcript_id "te_tx_326.3"; gene_id "te_tx_326";
chr10	exon	17322736	17324615	-	transcript_id "te_tx_326.3"; gene_id "te_tx_326";
chr10	transcript	18338212	18342230	+	transcript_id "te_tx_327.1"; gene_id "te_tx_327";
chr10	exon	18338212	18338457	+	transcript_id "te_tx_327.1"; gene_id "te_tx_327";
chr10	exon	18342115	18342230	+	transcript_id "te_tx_327.1"; gene_id "te_tx_327";
chr10	transcript	18818565	18829543	-	transcript_id "te_tx_328.1"; gene_id "te_tx_328";
chr10	exon	18818565	18818846	-	transcript_id "te_tx_328.1"; gene_id "te_tx_328";
chr10	exon	18829518	18829543	-	transcript_id "te_tx_328.1"; gene_id "te_tx_328";
chr10	transcript	19361653	19370756	+	transcript_id "te_tx_329.1"; gene_id "te_tx_329";
chr10	exon	19361653	19361702	+	transcript_id "te_tx_329.1"; gene_id "te_tx_329";
chr10	exon	19370577	19370756	+	transcript_id "te_tx_329.1"; gene_id "te_tx_329";
chr10	transcript	19724782	19728670	-	transcript_id "te_tx_330.1"; gene_id "te_tx_330";
chr10	exon	19724782	19724891	-	transcript_id "te_tx_330.1"; gene_id "te_tx_330";
chr10	exon	19728550	19728670	-	transcript_id "te_tx_330.1"; gene_id "te_tx_330";
chr10	transcript	20345869	20347809	-	transcript_id "te_tx_331.1"; gene_id "te_tx_331";
chr10	exon	20345869	20346043	-	transcript_id "te_tx_331.1"; gene_id "te_tx_331";
chr10	exon	20347728	20347809	-	transcript_id "te_tx_331.1"; gene_id "te_tx_331";
chr10	transcript	21365115	21367619	-	transcript_id "te_tx_332.1"; gene_id "te_tx_332";
chr10	exon	21365115	21367167	-	transcript_id "te_tx_332.1"; gene_id "te_tx_332";
chr10	exon	21367595	21367619	-	transcript_id "te_tx_332.1"; gene_id "te_tx_332";
chr10	transcript	21367812	21368220	-	transcript_id "te_tx_333.1"; gene_id "te_tx_333";
chr10	exon	21367812	21367852	-	transcript_id "te_tx_333.1"; gene_id "te_tx_333";
chr10	exon	21367940	21368220	-	transcript_id "te_tx_333.1"; gene_id "te_tx_333";
chr10	transcript	21367812	21374847	-	transcript_id "te_tx_333.2"; gene_id "te_tx_333";
chr10	exon	21367812	21367852	-	transcript_id "te_tx_333.2"; gene_id "te_tx_333";
chr10	exon	21374563	21374847	-	transcript_id "te_tx_333.2"; gene_id "te_tx_333";
chr10	transcript	21419341	21426443	+	transcript_id "te_tx_334.1"; gene_id "te_tx_334";
chr10	exon	21419341	21419384	+	transcript_id "te_tx_334.1"; gene_id "te_tx_334";
chr10	exon	21419416	21419518	+	transcript_id "te_tx_334.1"; gene_id "te_tx_334";
chr10	exon	21425304	21426443	+	transcript_id "te_tx_334.1"; gene_id "te_tx_334";
chr10	transcript	21593124	21622346	+	transcript_id "te_tx_335.1"; gene_id "te_tx_335";
chr10	exon	21593124	21593234	+	transcript_id "te_tx_335.1"; gene_id "te_tx_335";
chr10	exon	21593332	21593572	+	transcript_id "te_tx_335.1"; gene_id "te_tx_335";
chr10	exon	21621646	21622346	+	transcript_id "te_tx_335.1"; gene_id "te_tx_335";
chr10	transcript	21690899	21691889	+	transcript_id "te_tx_336.1"; gene_id "te_tx_336";
chr10	exon	21690899	21691237	+	transcript_id "te_tx_336.1"; gene_id "te_tx_336";
chr10	exon	21691582	21691889	+	transcript_id "te_tx_336.1"; gene_id "te_tx_336";
chr10	transcript	21834106	21845768	-	transcript_id "te_tx_337.2"; gene_id "te_tx_337";
chr10	exon	21834106	21835109	-	transcript_id "te_tx_337.2"; gene_id "te_tx_337";
chr10	exon	21836383	21836442	-	transcript_id "te_tx_337.2"; gene_id "te_tx_337";
chr10	exon	21844426	21844472	-	transcript_id "te_tx_337.2"; gene_id "te_tx_337";
chr10	exon	21844846	21844981	-	transcript_id "te_tx_337.2"; gene_id "te_tx_337";
chr10	exon	21845339	21845768	-	transcript_id "te_tx_337.2"; gene_id "te_tx_337";
chr10	transcript	21830203	21845023	-	transcript_id "te_tx_337.1"; gene_id "te_tx_337";
chr10	exon	21830203	21831433	-	transcript_id "te_tx_337.1"; gene_id "te_tx_337";
chr10	exon	21844426	21844472	-	transcript_id "te_tx_337.1"; gene_id "te_tx_337";
chr10	exon	21844846	21845023	-	transcript_id "te_tx_337.1"; gene_id "te_tx_337";
chr10	transcript	22038545	22044082	-	transcript_id "te_tx_338.1"; gene_id "te_tx_338";
chr10	exon	22038545	22040831	-	transcript_id "te_tx_338.1"; gene_id "te_tx_338";
chr10	exon	22042193	22042333	-	transcript_id "te_tx_338.1"; gene_id "te_tx_338";
chr10	exon	22043947	22044082	-	transcript_id "te_tx_338.1"; gene_id "te_tx_338";
chr10	transcript	22054883	22058622	-	transcript_id "te_tx_339.1"; gene_id "te_tx_339";
chr10	exon	22054883	22055117	-	transcript_id "te_tx_339.1"; gene_id "te_tx_339";
chr10	exon	22057529	22057604	-	transcript_id "te_tx_339.1"; gene_id "te_tx_339";
chr10	exon	22058350	22058622	-	transcript_id "te_tx_339.1"; gene_id "te_tx_339";
chr10	transcript	22054883	22057883	-	transcript_id "te_tx_339.2"; gene_id "te_tx_339";
chr10	exon	22054883	22055117	-	transcript_id "te_tx_339.2"; gene_id "te_tx_339";
chr10	exon	22057529	22057883	-	transcript_id "te_tx_339.2"; gene_id "te_tx_339";
chr10	transcript	22240511	22241909	+	transcript_id "te_tx_340.1"; gene_id "te_tx_340";
chr10	exon	22240511	22240773	+	transcript_id "te_tx_340.1"; gene_id "te_tx_340";
chr10	exon	22241110	22241909	+	transcript_id "te_tx_340.1"; gene_id "te_tx_340";
chr10	transcript	22430737	22433065	+	transcript_id "te_tx_341.1"; gene_id "te_tx_341";
chr10	exon	22430737	22430999	+	transcript_id "te_tx_341.1"; gene_id "te_tx_341";
chr10	exon	22431337	22433065	+	transcript_id "te_tx_341.1"; gene_id "te_tx_341";
chr10	transcript	22689458	22689987	-	transcript_id "te_tx_342.1"; gene_id "te_tx_342";
chr10	exon	22689458	22689742	-	transcript_id "te_tx_342.1"; gene_id "te_tx_342";
chr10	exon	22689818	22689987	-	transcript_id "te_tx_342.1"; gene_id "te_tx_342";
chr10	transcript	24126117	24132472	-	transcript_id "te_tx_343.1"; gene_id "te_tx_343";
chr10	exon	24126117	24126445	-	transcript_id "te_tx_343.1"; gene_id "te_tx_343";
chr10	exon	24132280	24132472	-	transcript_id "te_tx_343.1"; gene_id "te_tx_343";
chr10	transcript	24842306	24860056	+	transcript_id "te_tx_344.1"; gene_id "te_tx_344";
chr10	exon	24842306	24842763	+	transcript_id "te_tx_344.1"; gene_id "te_tx_344";
chr10	exon	24854762	24860056	+	transcript_id "te_tx_344.1"; gene_id "te_tx_344";
chr10	transcript	24842306	24842783	+	transcript_id "te_tx_344.2"; gene_id "te_tx_344";
chr10	exon	24842306	24842783	+	transcript_id "te_tx_344.2"; gene_id "te_tx_344";
chr10	transcript	24854780	24863885	-	transcript_id "te_tx_345.1"; gene_id "te_tx_345";
chr10	exon	24854780	24859548	-	transcript_id "te_tx_345.1"; gene_id "te_tx_345";
chr10	exon	24863479	24863885	-	transcript_id "te_tx_345.1"; gene_id "te_tx_345";
chr10	transcript	24927647	24930731	+	transcript_id "te_tx_346.1"; gene_id "te_tx_346";
chr10	exon	24927647	24927773	+	transcript_id "te_tx_346.1"; gene_id "te_tx_346";
chr10	exon	24929492	24930731	+	transcript_id "te_tx_346.1"; gene_id "te_tx_346";
chr10	transcript	25301061	25303591	+	transcript_id "te_tx_347.1"; gene_id "te_tx_347";
chr10	exon	25301061	25301233	+	transcript_id "te_tx_347.1"; gene_id "te_tx_347";
chr10	exon	25303514	25303591	+	transcript_id "te_tx_347.1"; gene_id "te_tx_347";
chr10	transcript	25895611	25903974	+	transcript_id "te_tx_348.1"; gene_id "te_tx_348";
chr10	exon	25895611	25899439	+	transcript_id "te_tx_348.1"; gene_id "te_tx_348";
chr10	exon	25901417	25903974	+	transcript_id "te_tx_348.1"; gene_id "te_tx_348";
chr10	transcript	25895611	25903974	+	transcript_id "te_tx_348.2"; gene_id "te_tx_348";
chr10	exon	25895611	25903974	+	transcript_id "te_tx_348.2"; gene_id "te_tx_348";
chr10	transcript	26500626	26500979	+	transcript_id "te_tx_349.2"; gene_id "te_tx_349";
chr10	exon	26500626	26500979	+	transcript_id "te_tx_349.2"; gene_id "te_tx_349";
chr10	transcript	26494776	26500979	+	transcript_id "te_tx_349.1"; gene_id "te_tx_349";
chr10	exon	26494776	26494920	+	transcript_id "te_tx_349.1"; gene_id "te_tx_349";
chr10	exon	26498626	26498747	+	transcript_id "te_tx_349.1"; gene_id "te_tx_349";
chr10	exon	26500733	26500979	+	transcript_id "te_tx_349.1"; gene_id "te_tx_349";
chr10	transcript	26926974	26935378	-	transcript_id "te_tx_350.1"; gene_id "te_tx_350";
chr10	exon	26926974	26929574	-	transcript_id "te_tx_350.1"; gene_id "te_tx_350";
chr10	exon	26934891	26935378	-	transcript_id "te_tx_350.1"; gene_id "te_tx_350";
chr10	transcript	29200286	29201163	-	transcript_id "te_tx_351.1"; gene_id "te_tx_351";
chr10	exon	29200286	29200785	-	transcript_id "te_tx_351.1"; gene_id "te_tx_351";
chr10	exon	29200845	29201163	-	transcript_id "te_tx_351.1"; gene_id "te_tx_351";
chr10	transcript	29288009	29289207	-	transcript_id "te_tx_352.1"; gene_id "te_tx_352";
chr10	exon	29288009	29288267	-	transcript_id "te_tx_352.1"; gene_id "te_tx_352";
chr10	exon	29289096	29289207	-	transcript_id "te_tx_352.1"; gene_id "te_tx_352";
chr10	transcript	30105460	30110045	-	transcript_id "te_tx_353.1"; gene_id "te_tx_353";
chr10	exon	30105460	30105719	-	transcript_id "te_tx_353.1"; gene_id "te_tx_353";
chr10	exon	30110023	30110045	-	transcript_id "te_tx_353.1"; gene_id "te_tx_353";
chr10	transcript	30115286	30117512	-	transcript_id "te_tx_354.1"; gene_id "te_tx_354";
chr10	exon	30115286	30117512	-	transcript_id "te_tx_354.1"; gene_id "te_tx_354";
chr10	transcript	30631813	30636559	-	transcript_id "te_tx_355.1"; gene_id "te_tx_355";
chr10	exon	30631813	30632000	-	transcript_id "te_tx_355.1"; gene_id "te_tx_355";
chr10	exon	30636448	30636559	-	transcript_id "te_tx_355.1"; gene_id "te_tx_355";
chr10	transcript	31187715	31189759	-	transcript_id "te_tx_356.1"; gene_id "te_tx_356";
chr10	exon	31187715	31188076	-	transcript_id "te_tx_356.1"; gene_id "te_tx_356";
chr10	exon	31188799	31188926	-	transcript_id "te_tx_356.1"; gene_id "te_tx_356";
chr10	exon	31189702	31189759	-	transcript_id "te_tx_356.1"; gene_id "te_tx_356";
chr10	transcript	31248273	31252335	-	transcript_id "te_tx_357.1"; gene_id "te_tx_357";
chr10	exon	31248273	31251189	-	transcript_id "te_tx_357.1"; gene_id "te_tx_357";
chr10	exon	31252143	31252335	-	transcript_id "te_tx_357.1"; gene_id "te_tx_357";
chr10	transcript	34230214	34233610	-	transcript_id "te_tx_358.1"; gene_id "te_tx_358";
chr10	exon	34230214	34230391	-	transcript_id "te_tx_358.1"; gene_id "te_tx_358";
chr10	exon	34230907	34231074	-	transcript_id "te_tx_358.1"; gene_id "te_tx_358";
chr10	exon	34231319	34231403	-	transcript_id "te_tx_358.1"; gene_id "te_tx_358";
chr10	exon	34233407	34233610	-	transcript_id "te_tx_358.1"; gene_id "te_tx_358";
chr10	transcript	34230214	34233610	-	transcript_id "te_tx_358.2"; gene_id "te_tx_358";
chr10	exon	34230214	34230391	-	transcript_id "te_tx_358.2"; gene_id "te_tx_358";
chr10	exon	34230907	34231074	-	transcript_id "te_tx_358.2"; gene_id "te_tx_358";
chr10	exon	34233407	34233610	-	transcript_id "te_tx_358.2"; gene_id "te_tx_358";
chr10	transcript	34230214	34233610	-	transcript_id "te_tx_358.3"; gene_id "te_tx_358";
chr10	exon	34230214	34230391	-	transcript_id "te_tx_358.3"; gene_id "te_tx_358";
chr10	exon	34230907	34231074	-	transcript_id "te_tx_358.3"; gene_id "te_tx_358";
chr10	exon	34231319	34231423	-	transcript_id "te_tx_358.3"; gene_id "te_tx_358";
chr10	exon	34233407	34233610	-	transcript_id "te_tx_358.3"; gene_id "te_tx_358";
chr10	transcript	34230214	34233999	-	transcript_id "te_tx_358.4"; gene_id "te_tx_358";
chr10	exon	34230214	34230391	-	transcript_id "te_tx_358.4"; gene_id "te_tx_358";
chr10	exon	34230907	34231074	-	transcript_id "te_tx_358.4"; gene_id "te_tx_358";
chr10	exon	34231319	34231403	-	transcript_id "te_tx_358.4"; gene_id "te_tx_358";
chr10	exon	34233407	34233573	-	transcript_id "te_tx_358.4"; gene_id "te_tx_358";
chr10	exon	34233752	34233999	-	transcript_id "te_tx_358.4"; gene_id "te_tx_358";
chr10	transcript	34285955	34286369	+	transcript_id "te_tx_359.1"; gene_id "te_tx_359";
chr10	exon	34285955	34285975	+	transcript_id "te_tx_359.1"; gene_id "te_tx_359";
chr10	exon	34286097	34286369	+	transcript_id "te_tx_359.1"; gene_id "te_tx_359";
chr10	transcript	37139438	37151077	+	transcript_id "te_tx_360.1"; gene_id "te_tx_360";
chr10	exon	37139438	37141185	+	transcript_id "te_tx_360.1"; gene_id "te_tx_360";
chr10	exon	37148877	37149006	+	transcript_id "te_tx_360.1"; gene_id "te_tx_360";
chr10	exon	37150487	37151077	+	transcript_id "te_tx_360.1"; gene_id "te_tx_360";
chr10	transcript	37142480	37149007	+	transcript_id "te_tx_360.2"; gene_id "te_tx_360";
chr10	exon	37142480	37142521	+	transcript_id "te_tx_360.2"; gene_id "te_tx_360";
chr10	exon	37148877	37149007	+	transcript_id "te_tx_360.2"; gene_id "te_tx_360";
chr10	transcript	38069633	38122112	-	transcript_id "te_tx_361.1"; gene_id "te_tx_361";
chr10	exon	38069633	38069673	-	transcript_id "te_tx_361.1"; gene_id "te_tx_361";
chr10	exon	38117872	38117930	-	transcript_id "te_tx_361.1"; gene_id "te_tx_361";
chr10	exon	38121957	38122112	-	transcript_id "te_tx_361.1"; gene_id "te_tx_361";
chr10	transcript	38116085	38122112	-	transcript_id "te_tx_361.2"; gene_id "te_tx_361";
chr10	exon	38116085	38116347	-	transcript_id "te_tx_361.2"; gene_id "te_tx_361";
chr10	exon	38117872	38117930	-	transcript_id "te_tx_361.2"; gene_id "te_tx_361";
chr10	exon	38121957	38122112	-	transcript_id "te_tx_361.2"; gene_id "te_tx_361";
chr10	transcript	39164853	39173238	-	transcript_id "te_tx_362.1"; gene_id "te_tx_362";
chr10	exon	39164853	39167888	-	transcript_id "te_tx_362.1"; gene_id "te_tx_362";
chr10	exon	39172631	39173238	-	transcript_id "te_tx_362.1"; gene_id "te_tx_362";
chr10	transcript	39502455	39503285	-	transcript_id "te_tx_363.1"; gene_id "te_tx_363";
chr10	exon	39502455	39502863	-	transcript_id "te_tx_363.1"; gene_id "te_tx_363";
chr10	exon	39503204	39503285	-	transcript_id "te_tx_363.1"; gene_id "te_tx_363";
chr10	transcript	39555197	39558515	-	transcript_id "te_tx_364.1"; gene_id "te_tx_364";
chr10	exon	39555197	39557285	-	transcript_id "te_tx_364.1"; gene_id "te_tx_364";
chr10	exon	39557965	39558515	-	transcript_id "te_tx_364.1"; gene_id "te_tx_364";
chr10	transcript	39665726	39668708	+	transcript_id "te_tx_365.1"; gene_id "te_tx_365";
chr10	exon	39665726	39665824	+	transcript_id "te_tx_365.1"; gene_id "te_tx_365";
chr10	exon	39667105	39668708	+	transcript_id "te_tx_365.1"; gene_id "te_tx_365";
chr10	transcript	39890173	39899218	-	transcript_id "te_tx_366.1"; gene_id "te_tx_366";
chr10	exon	39890173	39892929	-	transcript_id "te_tx_366.1"; gene_id "te_tx_366";
chr10	exon	39894016	39894132	-	transcript_id "te_tx_366.1"; gene_id "te_tx_366";
chr10	exon	39894772	39894940	-	transcript_id "te_tx_366.1"; gene_id "te_tx_366";
chr10	exon	39898914	39899218	-	transcript_id "te_tx_366.1"; gene_id "te_tx_366";
chr10	transcript	39890173	39899218	-	transcript_id "te_tx_366.2"; gene_id "te_tx_366";
chr10	exon	39890173	39892929	-	transcript_id "te_tx_366.2"; gene_id "te_tx_366";
chr10	exon	39894016	39894132	-	transcript_id "te_tx_366.2"; gene_id "te_tx_366";
chr10	exon	39894772	39899218	-	transcript_id "te_tx_366.2"; gene_id "te_tx_366";
chr10	transcript	39890173	39899218	-	transcript_id "te_tx_366.3"; gene_id "te_tx_366";
chr10	exon	39890173	39892929	-	transcript_id "te_tx_366.3"; gene_id "te_tx_366";
chr10	exon	39894016	39894132	-	transcript_id "te_tx_366.3"; gene_id "te_tx_366";
chr10	exon	39894772	39894940	-	transcript_id "te_tx_366.3"; gene_id "te_tx_366";
chr10	exon	39895512	39899218	-	transcript_id "te_tx_366.3"; gene_id "te_tx_366";
chr10	transcript	40282896	40283511	+	transcript_id "te_tx_367.1"; gene_id "te_tx_367";
chr10	exon	40282896	40283122	+	transcript_id "te_tx_367.1"; gene_id "te_tx_367";
chr10	exon	40283429	40283511	+	transcript_id "te_tx_367.1"; gene_id "te_tx_367";
chr10	transcript	41414875	41415541	-	transcript_id "te_tx_368.1"; gene_id "te_tx_368";
chr10	exon	41414875	41415082	-	transcript_id "te_tx_368.1"; gene_id "te_tx_368";
chr10	exon	41415196	41415541	-	transcript_id "te_tx_368.1"; gene_id "te_tx_368";
chr10	transcript	41470365	41477979	-	transcript_id "te_tx_369.1"; gene_id "te_tx_369";
chr10	exon	41470365	41472292	-	transcript_id "te_tx_369.1"; gene_id "te_tx_369";
chr10	exon	41477674	41477979	-	transcript_id "te_tx_369.1"; gene_id "te_tx_369";
chr10	transcript	43435900	43441183	-	transcript_id "te_tx_370.1"; gene_id "te_tx_370";
chr10	exon	43435900	43438514	-	transcript_id "te_tx_370.1"; gene_id "te_tx_370";
chr10	exon	43441017	43441183	-	transcript_id "te_tx_370.1"; gene_id "te_tx_370";
chr10	transcript	45178098	45180967	+	transcript_id "te_tx_371.1"; gene_id "te_tx_371";
chr10	exon	45178098	45178192	+	transcript_id "te_tx_371.1"; gene_id "te_tx_371";
chr10	exon	45180394	45180571	+	transcript_id "te_tx_371.1"; gene_id "te_tx_371";
chr10	exon	45180658	45180967	+	transcript_id "te_tx_371.1"; gene_id "te_tx_371";
chr10	transcript	45828996	45838332	+	transcript_id "te_tx_372.1"; gene_id "te_tx_372";
chr10	exon	45828996	45829028	+	transcript_id "te_tx_372.1"; gene_id "te_tx_372";
chr10	exon	45838084	45838332	+	transcript_id "te_tx_372.1"; gene_id "te_tx_372";
chr10	transcript	46670654	46819978	-	transcript_id "te_tx_373.1"; gene_id "te_tx_373";
chr10	exon	46670654	46670714	-	transcript_id "te_tx_373.1"; gene_id "te_tx_373";
chr10	exon	46819783	46819978	-	transcript_id "te_tx_373.1"; gene_id "te_tx_373";
chr10	transcript	47333968	47442296	-	transcript_id "te_tx_374.1"; gene_id "te_tx_374";
chr10	exon	47333968	47334045	-	transcript_id "te_tx_374.1"; gene_id "te_tx_374";
chr10	exon	47441975	47442296	-	transcript_id "te_tx_374.1"; gene_id "te_tx_374";
chr10	transcript	47757460	47805431	+	transcript_id "te_tx_375.1"; gene_id "te_tx_375";
chr10	exon	47757460	47757956	+	transcript_id "te_tx_375.1"; gene_id "te_tx_375";
chr10	exon	47804978	47805431	+	transcript_id "te_tx_375.1"; gene_id "te_tx_375";
chr10	transcript	50889157	50894523	-	transcript_id "te_tx_376.1"; gene_id "te_tx_376";
chr10	exon	50889157	50892590	-	transcript_id "te_tx_376.1"; gene_id "te_tx_376";
chr10	exon	50893080	50894523	-	transcript_id "te_tx_376.1"; gene_id "te_tx_376";
chr10	transcript	51413625	51418305	-	transcript_id "te_tx_377.1"; gene_id "te_tx_377";
chr10	exon	51413625	51413663	-	transcript_id "te_tx_377.1"; gene_id "te_tx_377";
chr10	exon	51414765	51414859	-	transcript_id "te_tx_377.1"; gene_id "te_tx_377";
chr10	exon	51415135	51415223	-	transcript_id "te_tx_377.1"; gene_id "te_tx_377";
chr10	exon	51418120	51418305	-	transcript_id "te_tx_377.1"; gene_id "te_tx_377";
chr10	transcript	52496492	52583397	+	transcript_id "te_tx_378.1"; gene_id "te_tx_378";
chr10	exon	52496492	52496565	+	transcript_id "te_tx_378.1"; gene_id "te_tx_378";
chr10	exon	52583186	52583397	+	transcript_id "te_tx_378.1"; gene_id "te_tx_378";
chr10	transcript	55718388	55720596	-	transcript_id "te_tx_379.1"; gene_id "te_tx_379";
chr10	exon	55718388	55719560	-	transcript_id "te_tx_379.1"; gene_id "te_tx_379";
chr10	exon	55719600	55720596	-	transcript_id "te_tx_379.1"; gene_id "te_tx_379";
chr10	transcript	56431952	56470552	+	transcript_id "te_tx_380.1"; gene_id "te_tx_380";
chr10	exon	56431952	56432183	+	transcript_id "te_tx_380.1"; gene_id "te_tx_380";
chr10	exon	56438536	56438650	+	transcript_id "te_tx_380.1"; gene_id "te_tx_380";
chr10	exon	56439664	56439773	+	transcript_id "te_tx_380.1"; gene_id "te_tx_380";
chr10	exon	56452277	56452396	+	transcript_id "te_tx_380.1"; gene_id "te_tx_380";
chr10	exon	56470274	56470552	+	transcript_id "te_tx_380.1"; gene_id "te_tx_380";
chr10	transcript	57767843	57851520	+	transcript_id "te_tx_381.1"; gene_id "te_tx_381";
chr10	exon	57767843	57768063	+	transcript_id "te_tx_381.1"; gene_id "te_tx_381";
chr10	exon	57851427	57851520	+	transcript_id "te_tx_381.1"; gene_id "te_tx_381";
chr10	transcript	58243713	58253124	-	transcript_id "te_tx_382.1"; gene_id "te_tx_382";
chr10	exon	58243713	58243910	-	transcript_id "te_tx_382.1"; gene_id "te_tx_382";
chr10	exon	58253100	58253124	-	transcript_id "te_tx_382.1"; gene_id "te_tx_382";
chr10	transcript	58308479	58311553	+	transcript_id "te_tx_383.1"; gene_id "te_tx_383";
chr10	exon	58308479	58308637	+	transcript_id "te_tx_383.1"; gene_id "te_tx_383";
chr10	exon	58310457	58311553	+	transcript_id "te_tx_383.1"; gene_id "te_tx_383";
chr10	transcript	58530497	58536495	-	transcript_id "te_tx_384.1"; gene_id "te_tx_384";
chr10	exon	58530497	58530849	-	transcript_id "te_tx_384.1"; gene_id "te_tx_384";
chr10	exon	58536057	58536244	-	transcript_id "te_tx_384.1"; gene_id "te_tx_384";
chr10	exon	58536320	58536495	-	transcript_id "te_tx_384.1"; gene_id "te_tx_384";
chr10	transcript	58530497	58536495	-	transcript_id "te_tx_384.2"; gene_id "te_tx_384";
chr10	exon	58530497	58530849	-	transcript_id "te_tx_384.2"; gene_id "te_tx_384";
chr10	exon	58536057	58536228	-	transcript_id "te_tx_384.2"; gene_id "te_tx_384";
chr10	exon	58536320	58536495	-	transcript_id "te_tx_384.2"; gene_id "te_tx_384";
chr10	transcript	58530497	58536495	-	transcript_id "te_tx_384.3"; gene_id "te_tx_384";
chr10	exon	58530497	58530849	-	transcript_id "te_tx_384.3"; gene_id "te_tx_384";
chr10	exon	58536057	58536495	-	transcript_id "te_tx_384.3"; gene_id "te_tx_384";
chr10	transcript	58751862	58757814	+	transcript_id "te_tx_385.1"; gene_id "te_tx_385";
chr10	exon	58751862	58751948	+	transcript_id "te_tx_385.1"; gene_id "te_tx_385";
chr10	exon	58756927	58757814	+	transcript_id "te_tx_385.1"; gene_id "te_tx_385";
chr10	transcript	59202009	59203744	-	transcript_id "te_tx_386.1"; gene_id "te_tx_386";
chr10	exon	59202009	59203744	-	transcript_id "te_tx_386.1"; gene_id "te_tx_386";
chr10	transcript	59254442	59261845	-	transcript_id "te_tx_387.1"; gene_id "te_tx_387";
chr10	exon	59254442	59254466	-	transcript_id "te_tx_387.1"; gene_id "te_tx_387";
chr10	exon	59261308	59261450	-	transcript_id "te_tx_387.1"; gene_id "te_tx_387";
chr10	exon	59261619	59261845	-	transcript_id "te_tx_387.1"; gene_id "te_tx_387";
chr10	transcript	59380266	59387052	+	transcript_id "te_tx_388.1"; gene_id "te_tx_388";
chr10	exon	59380266	59382409	+	transcript_id "te_tx_388.1"; gene_id "te_tx_388";
[truncated: 34,659 more rows]
