# Supplementary material for: Transcript assembly improves expression quantification of transposable elements in single-cell RNA-seq data
Source: HighWire-hosted journal article supplement (doi:10.1101/gr.265173.120), 2020-12-21
Supplement: Supplemental_Table_S3.xlsx [file Supplemental_Table_S3.xlsx]

## Sheet: Supplemental_Table_S3
Supplemental Table S3 Expression patterns of 146 TE transcripts with strong tissue enrichment during mouse gastrulation and early organogenesis
Expression patterns of 146 TE transcripts with strong tissue enrichment during mouse gastrulation and early organogenesis
gene_name	enriched_tissues
te-tx-1899	ExE ectoderm, Parietal endoderm
te-tx-4854	ExE ectoderm
te-tx-3173	ExE ectoderm
te-tx-2841	ExE ectoderm
te-tx-1424	ExE ectoderm, Neural crest, Caudal Mesoderm, Endothelium, Surface ectoderm, PGC
te-tx-1767	ExE ectoderm, Neural crest, Caudal Mesoderm, Endothelium, Surface ectoderm, PGC
te-tx-379	ExE ectoderm, PGC
te-tx-1447	ExE ectoderm
te-tx-2125	ExE ectoderm
te-tx-2953	ExE ectoderm
te-tx-3699	ExE ectoderm, ExE endoderm, Visceral endoderm
te-tx-935	ExE ectoderm
te-tx-3799	ExE ectoderm
te-tx-2870	ExE ectoderm
te-tx-4028	ExE ectoderm
te-tx-648	ExE endoderm, Visceral endoderm, PGC
te-tx-2401	ExE endoderm, Visceral endoderm
te-tx-496	ExE endoderm
te-tx-139	ExE endoderm, Visceral endoderm
te-tx-4359	ExE endoderm
te-tx-1140	ExE endoderm, ExE mesoderm, Mesenchyme, Allantois, Visceral endoderm
te-tx-1142	ExE endoderm, Mesenchyme, Visceral endoderm
te-tx-719	ExE endoderm, Parietal endoderm, Visceral endoderm
te-tx-4036	ExE endoderm, Erythroid3, Erythroid1, Visceral endoderm, Erythroid2
te-tx-622	ExE endoderm
te-tx-3144	ExE endoderm
te-tx-5272	ExE endoderm, Visceral endoderm
te-tx-420	ExE endoderm
te-tx-2054	ExE endoderm, PGC
te-tx-5097	ExE endoderm
te-tx-2286	ExE mesoderm, Mixed mesoderm, Intermediate mesoderm, Pharyngeal mesoderm, Mesenchyme, Allantois, Gut, Cardiomyocytes, PGC
te-tx-4522	ExE mesoderm, Intermediate mesoderm, Somitic mesoderm
te-tx-136	Primitive Streak, Epiblast
te-tx-81	Primitive Streak, Nascent mesoderm, Caudal epiblast, Epiblast, Rostral neurectoderm, Caudal neurectoderm
te-tx-1010	Primitive Streak, Epiblast, Rostral neurectoderm
te-tx-1306	Primitive Streak, Nascent mesoderm, Def. endoderm, Epiblast, Anterior Primitive Streak
te-tx-3686	Blood progenitors 2, Erythroid3, Erythroid1, Cardiomyocytes, Erythroid2
te-tx-2716	Blood progenitors 2, Erythroid1
te-tx-2255	Blood progenitors 2, Neural crest, Blood progenitors 1
te-tx-927	Nascent mesoderm, Somitic mesoderm
te-tx-3472	Neural crest
te-tx-2490	Erythroid3, Erythroid2
te-tx-2080	Pharyngeal mesoderm, Mesenchyme, Paraxial mesoderm, Gut, Cardiomyocytes, Notochord
te-tx-4365	Pharyngeal mesoderm, Cardiomyocytes
te-tx-4674	Pharyngeal mesoderm, Gut, Cardiomyocytes, Notochord
te-tx-4670	Pharyngeal mesoderm, Cardiomyocytes
te-tx-4750	Forebrain/Midbrain/Hindbrain
te-tx-4796	Epiblast
te-tx-232	Epiblast, Endothelium
te-tx-2003	Epiblast
te-tx-3571	Epiblast
te-tx-3022	Epiblast
te-tx-3488	Paraxial mesoderm
te-tx-1931	Spinal cord
te-tx-5158	Rostral neurectoderm, Somitic mesoderm
te-tx-1387	Endothelium
te-tx-684	Endothelium
te-tx-4194	Erythroid1
te-tx-1399	Parietal endoderm, Visceral endoderm
te-tx-4051	Visceral endoderm
te-tx-72	Visceral endoderm
te-tx-4357	Cardiomyocytes
te-tx-2861	Cardiomyocytes
te-tx-210	PGC
te-tx-1169	Notochord
te-tx-4076	Notochord
te-tx-1613	Notochord
te-tx-1523	Notochord
te-tx-2916	Notochord
te-tx-571	Notochord
te-tx-3715	Notochord
te-tx-2367	Notochord
te-tx-4795	Notochord
te-tx-685	Notochord
te-tx-1171	ExE_ectoderm
te-tx-1354	ExE_ectoderm
te-tx-1356	ExE_ectoderm
te-tx-1721	ExE_ectoderm
te-tx-2227	ExE_ectoderm
te-tx-2624	ExE_ectoderm, Nascent_mesoderm
te-tx-3024	ExE_ectoderm, ExE_endoderm, Visceral_endoderm
te-tx-339	ExE_ectoderm, ExE_endoderm
te-tx-3694	ExE_ectoderm
te-tx-4339	ExE_ectoderm
te-tx-4848	ExE_ectoderm
te-tx-5114	ExE_ectoderm
te-tx-5184	ExE_ectoderm
te-tx-772	ExE_ectoderm, ExE_endoderm, Visceral_endoderm
te-tx-918	ExE_ectoderm
te-tx-959	ExE_ectoderm
te-tx-973	ExE_ectoderm
te-tx-1144	ExE_endoderm, Mesenchyme, Visceral_endoderm
te-tx-1549	ExE_endoderm
te-tx-1977	ExE_endoderm, Visceral_endoderm
te-tx-2026	ExE_endoderm, Visceral_endoderm
te-tx-2126	ExE_endoderm
te-tx-492	ExE_endoderm
te-tx-502	ExE_endoderm
te-tx-5190	ExE_endoderm
te-tx-778	ExE_endoderm, Parietal_endoderm, Visceral_endoderm
te-tx-4809	ExE_mesoderm
te-tx-474	Blood_progenitors_2, Erythroid1
te-tx-2940	Intermediate_mesoderm, Somitic_mesoderm
te-tx-4363	Def._endoderm, Visceral_endoderm, Anterior_Primitive_Streak
te-tx-4698	Def._endoderm
te-tx-1415	Neural_crest
te-tx-5046	Erythroid3
te-tx-769	Erythroid3, Erythroid1, Erythroid2
te-tx-991	Erythroid3, Erythroid2
te-tx-432	Pharyngeal_mesoderm, Mesenchyme, Cardiomyocytes
te-tx-1590	Mesenchyme
te-tx-3856	Forebrain_Midbrain_Hindbrain, Spinal_cord
te-tx-470	Forebrain_Midbrain_Hindbrain
te-tx-3178	Epiblast
te-tx-5215	Epiblast
te-tx-3483	Paraxial_mesoderm
te-tx-3380	Spinal_cord
te-tx-3382	Spinal_cord
te-tx-857	Allantois
te-tx-3907	Rostral_neurectoderm, Caudal_neurectoderm
te-tx-4217	Rostral_neurectoderm, Notochord
te-tx-133	Endothelium
te-tx-2371	Endothelium
te-tx-2508	Endothelium
te-tx-2511	Endothelium, Haematoendothelial_progenitors, Blood_progenitors_1
te-tx-2882	Endothelium
te-tx-4103	Endothelium
te-tx-4268	Endothelium
te-tx-1004	Erythroid1
te-tx-1801	Erythroid1, Erythroid2
te-tx-325	Visceral_endoderm
te-tx-596	Visceral_endoderm
te-tx-620	Somitic_mesoderm
te-tx-2665	Cardiomyocytes
te-tx-3300	Cardiomyocytes
te-tx-3857	Cardiomyocytes
te-tx-4680	Cardiomyocytes
te-tx-806	Cardiomyocytes
te-tx-1614	Notochord
te-tx-1702	Notochord
te-tx-1921	Notochord
te-tx-2578	Notochord
te-tx-2813	Notochord
te-tx-3172	Notochord
te-tx-3886	Notochord
te-tx-3906	Notochord
